# Supplementary material for: Antioxidant Activities of Phenolic Metabolites from Flemingia philippinensis Merr. et Rolfe and Their Application to DNA Damage Protection
Source: PubMed Central journal article supplement (PMC6017228; doi:10.3390/molecules23040816), 2018-04-02
Supplement: molecules-23-00816-s001.pdf [file molecules-23-00816-s001.pdf]

## **Supplementary materials**

### **Antioxidant activities of phenolic metabolites from *Flemingia philippinensis* and application to DNA damage protection**

Jeong Yoon Kim <sup>1</sup>, Yan Wang <sup>2</sup>, Yeong Hun Song <sup>1</sup>, Zia Uddin <sup>1</sup>,

Zuo Peng Li <sup>1</sup>, Yeong Jun Ban<sup>1</sup> and Ki Hun Park <sup>1,\*</sup>

<sup>1</sup> *Division of Applied Life Science (BK21 plus), IALS, Gyeongsang National University, Jinju 52828, Republic of Korea*

<sup>2</sup> *College of Food and Biological Engineering, Qiqihar University, Qiqihar 161006, China*

## List of supporting information

**Figure S1.**  $^1\text{H-NMR}$  and  $^{13}\text{C-NMR}$  spectrums of compound **1**

**Figure S2.** EIMS and HREIMS data of compound **1**

**Figure S3.**  $^1\text{H-NMR}$  and  $^{13}\text{C-NMR}$  spectrums of compound **2**

**Figure S4.** EIMS and HREIMS data of compound **2**

**Figure S5.**  $^1\text{H-NMR}$  and  $^{13}\text{C-NMR}$  spectrums of compound **3**

**Figure S6.** EIMS and HREIMS data of compound **3**

**Figure S7.**  $^1\text{H-NMR}$  and  $^{13}\text{C-NMR}$  spectrums of compound **4**

**Figure S8.** EIMS and HREIMS data of compound **4**

**Figure S9.**  $^1\text{H-NMR}$  and  $^{13}\text{C-NMR}$  spectrums of compound **5**

**Figure S10.** EIMS and HREIMS data of compound **5**

**Figure S11.**  $^1\text{H-NMR}$  and  $^{13}\text{C-NMR}$  spectrums of compound **6**

**Figure S12.** EIMS and HREIMS data of compound **6**

**Figure S13.**  $^1\text{H-NMR}$  and  $^{13}\text{C-NMR}$  spectrums of compound **7**

**Figure S14.** EIMS and HREIMS data of compound **7**

**Figure S15.**  $^1\text{H-NMR}$  and  $^{13}\text{C-NMR}$  spectrums of compound **8**

**Figure S16.** EIMS and HREIMS data of compound **8**

**Figure S17.**  $^1\text{H-NMR}$  and  $^{13}\text{C-NMR}$  spectrums of compound **9**

**Figure S18.** EIMS and HREIMS data of compound **9**

**Figure S19.**  $^1\text{H-NMR}$  and  $^{13}\text{C-NMR}$  spectrums of compound **10**

**Figure S20.** EIMS and HREIMS data of compound **10**

**Figure S21.**  $^1\text{H-NMR}$  and  $^{13}\text{C-NMR}$  spectrums of compound **11**

**Figure S22.** EIMS and HREIMS data of compound **11**

**Figure S23.**  $^1\text{H-NMR}$  and  $^{13}\text{C-NMR}$  spectrums of compound **12**

**Figure S24.** EIMS and HREIMS data of compound **12**

**Figure S25.**  $^1\text{H-NMR}$  and  $^{13}\text{C-NMR}$  spectrums of compound **13**

**Figure S26.** EIMS and HREIMS data of compound **13**

**Figure S27.**  $^1\text{H-NMR}$  and  $^{13}\text{C-NMR}$  spectrums of compound **14**

**Figure S28.** EIMS and HREIMS data of compound **14**

**Figure S29.**  $^1\text{H-NMR}$  and  $^{13}\text{C-NMR}$  spectrums of compound **15**

**Figure S30.** EIMS and HREIMS data of compound **15**

**Figure S31.**  $^1\text{H-NMR}$  and  $^{13}\text{C-NMR}$  spectrums of compound **16**

**Figure S32.** EIMS and HREIMS data of compound **16**

**Figure S33.**  $^1\text{H-NMR}$  and  $^{13}\text{C-NMR}$  spectrums of compound **17**

**Figure S34.** EIMS and HREIMS data of compound **17**

**Figure S35.**  $^1\text{H-NMR}$  and  $^{13}\text{C-NMR}$  spectrums of compound **18**

**Figure S36.** EIMS and HREIMS data of compound **18**

**Figure S37.** ESR spectra of DPPH radical scavenging effect of compounds**1-9**

**Figure S38.** ESR spectra of DPPH radical scavenging effect of compounds**10-18**

**Figure S39.** ESR spectra of hydroxyl radical scavenging effect of compounds**1-9**

**Figure S40.** ESR spectra of hydroxyl radical scavenging effect of compounds**10-18**

**Figure S41.** ESR spectra of superoxide radical scavenging effect of compounds**1-9**

**Figure S42.** ESR spectra of superoxide radical scavenging effect of compounds**10-18**

**Figure S43-45.** Results of electrophoresis by pBR322 plasmid DNA band intensity

**Table S1.** pBR322 plasmid DNA damage protective effect of **1-18**.

**Table S2.** Protective effect of pBR322 plasmid DNA by dose dependent of compound **2**

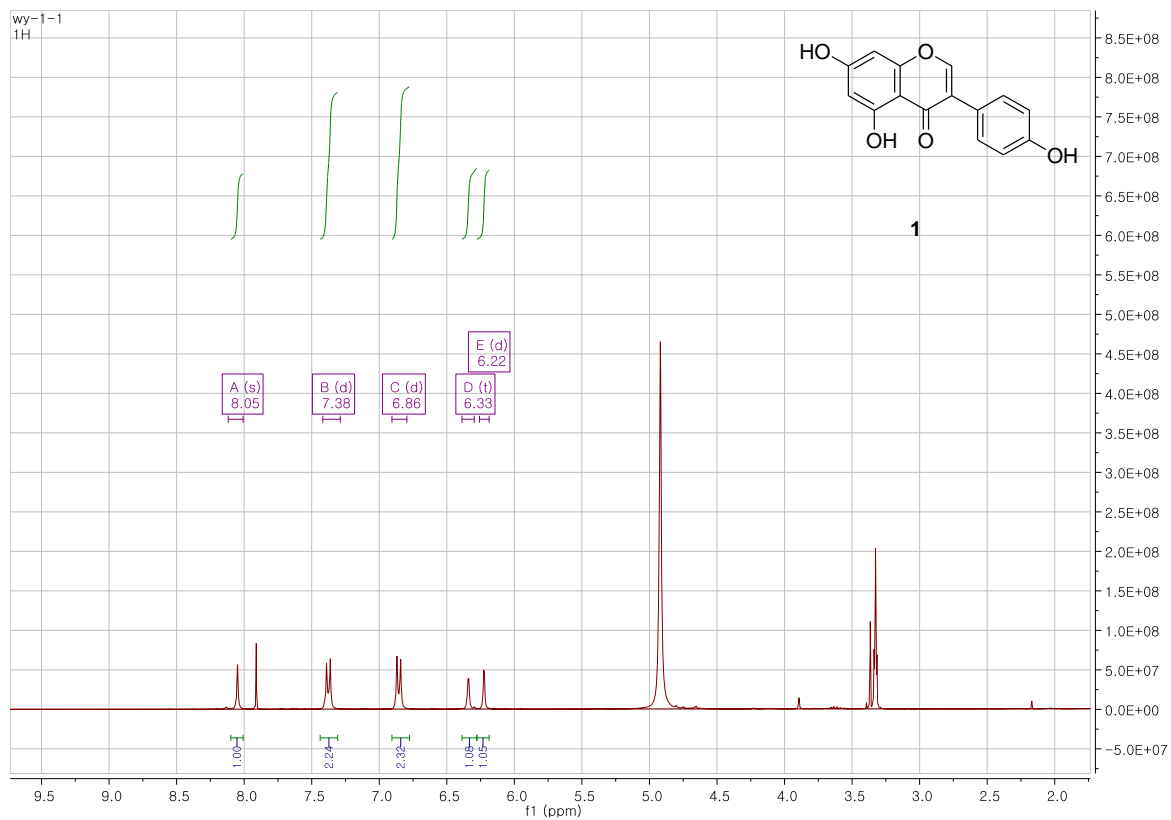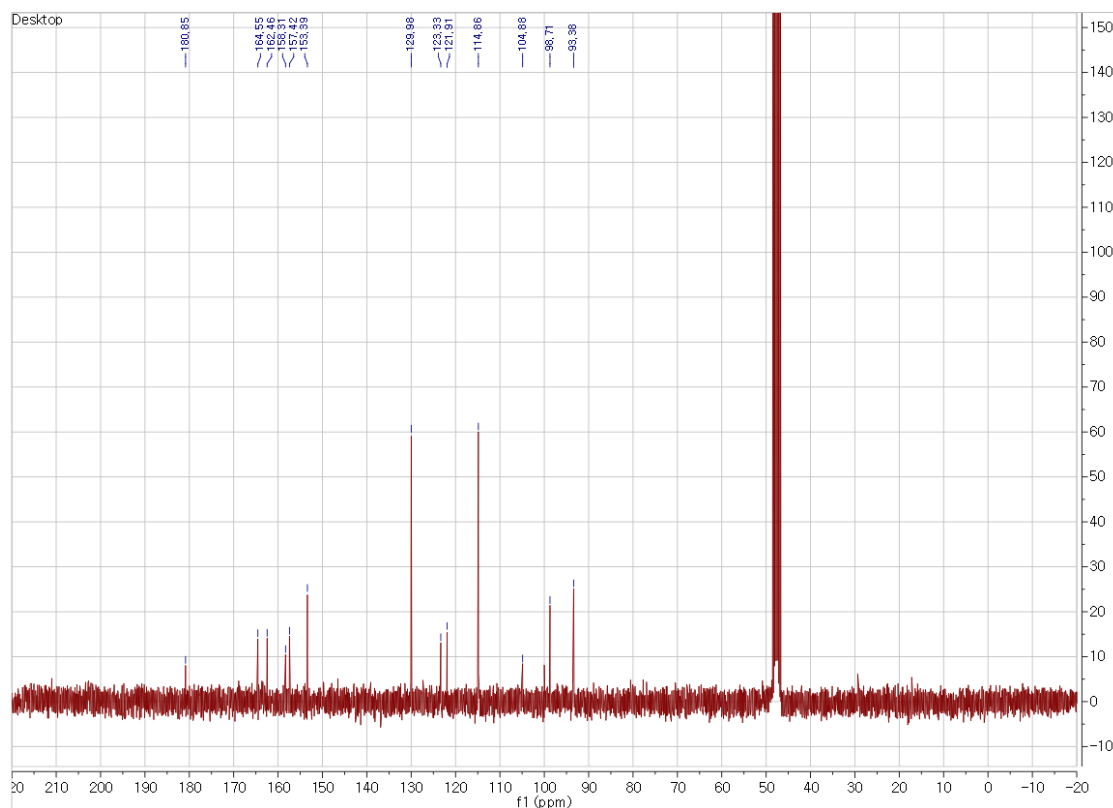

**Figure 1.**  $^1\text{H}$ -NMR (500 MHz) and  $^{13}\text{C}$ -NMR (125 MHz) spectrums of compound 1( $\text{CD}_3\text{OD}$ )



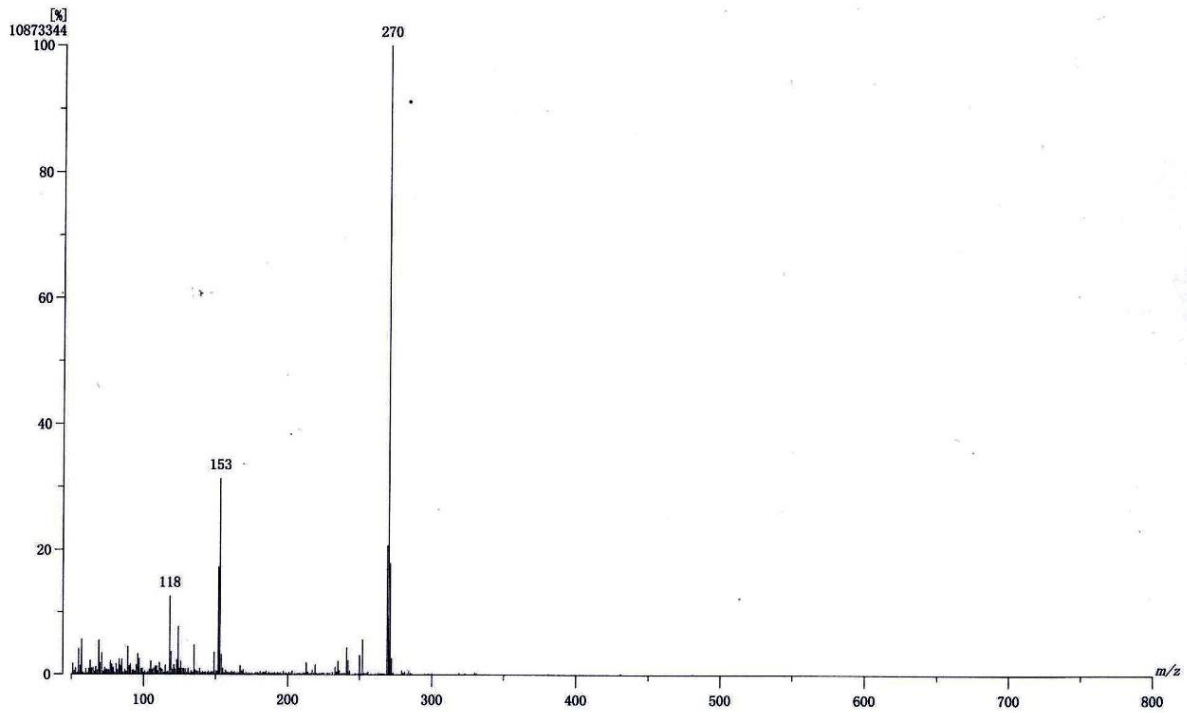

Instrument : MStation  
 Sample : -  
 Note : -  
 Inlet : Direct    Ion Mode : EI+  
 RT : 1.87 min    Scan# : 29  
 Elements : C 24/1, H 49/1, O 10/1  
 Mass Tolerance : 3mmu  
 Unsaturation (U.S.) : -0.5 - 30.0

|   | Observed m/z | Int%  | Err [ppm / mmu] | U.S. Composition |
|---|--------------|-------|-----------------|------------------|
| 1 | 270.0531     | 84.93 | +1.0 / +0.3     | 11.0 C15 H10 O5  |

Figure 2. EIMS and HREIMS data of compound 1

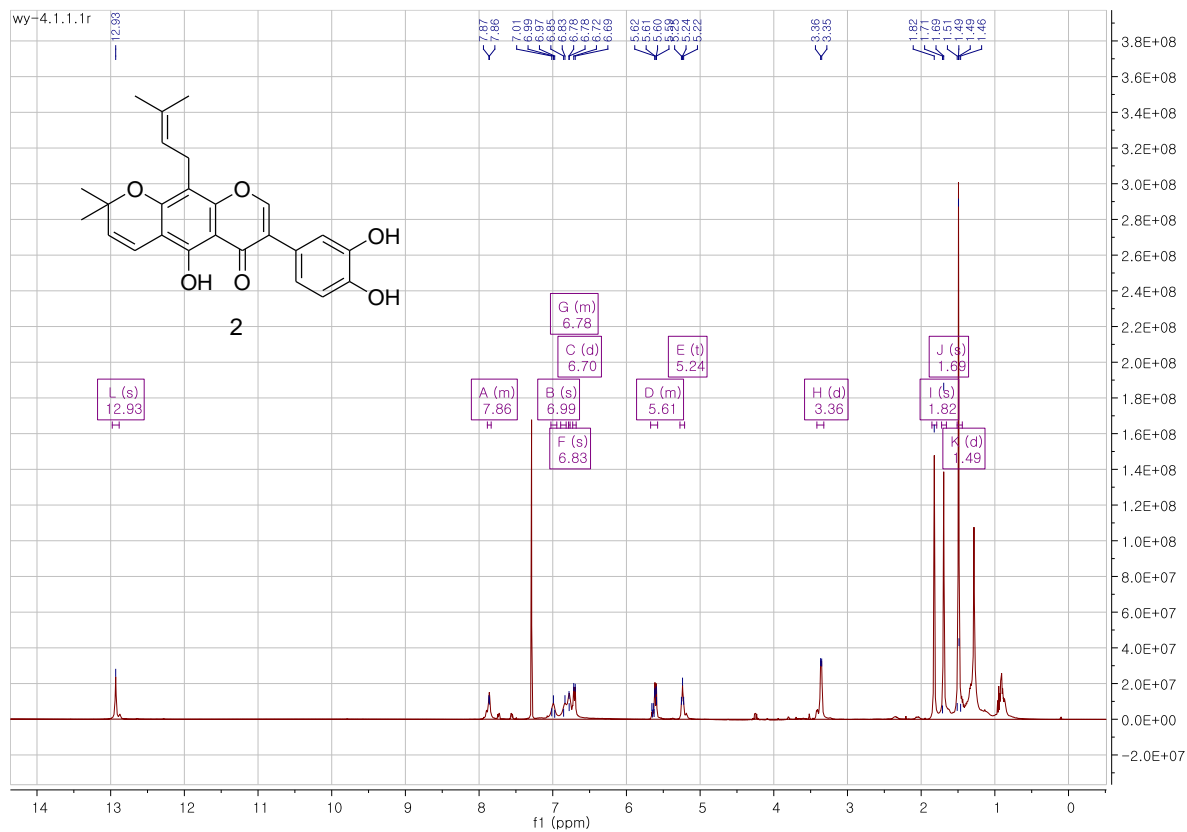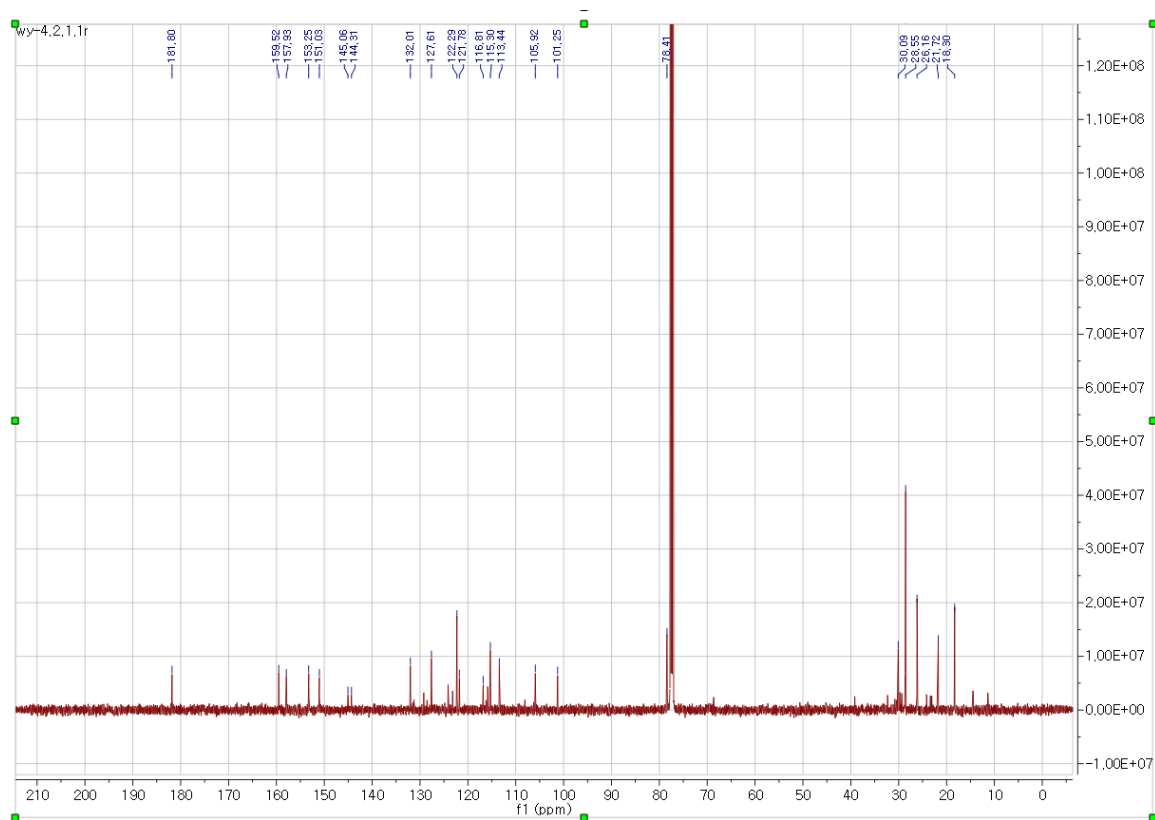

**Figure 3.**  $^1\text{H-NMR}$  (500 MHz) and  $^{13}\text{C-NMR}$  (125 MHz) spectrums of compound **2** ( $\text{CDCl}_3$ )

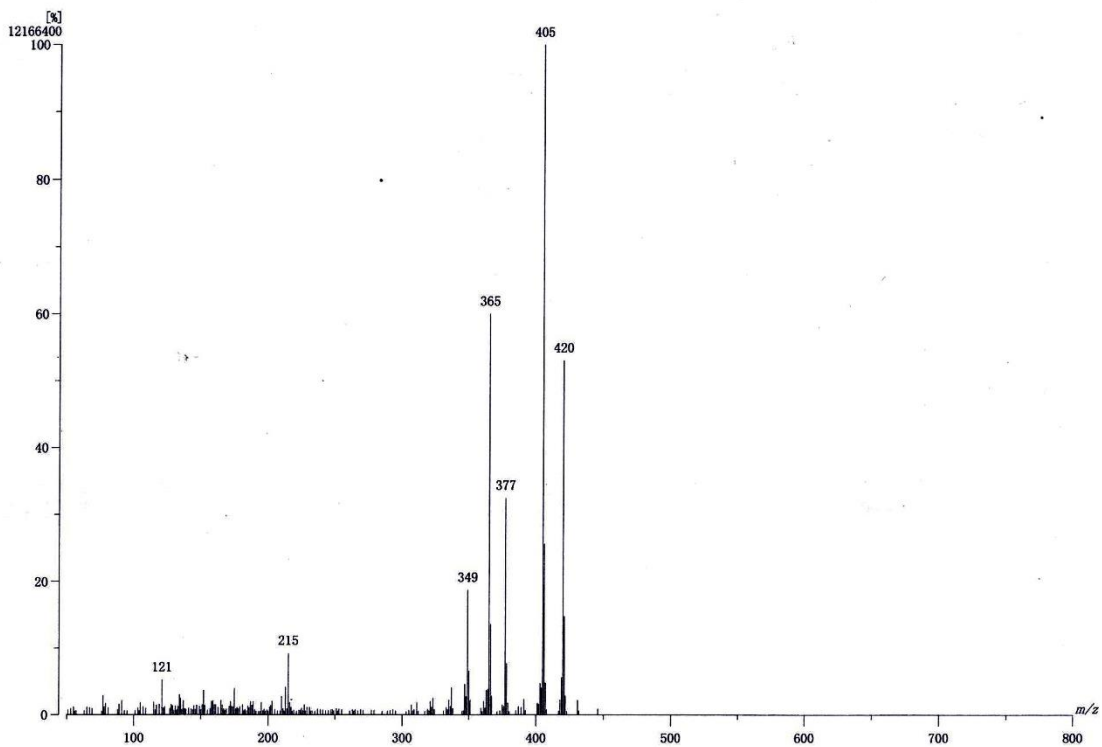

**Instrument :** MStation  
**Sample :** -  
**Note :** -  
**Inlet :** Direct    **Ion Mode :** EI+  
**RT :** 2.04 min    **Scan# :** 62  
**Elements :** C 100/1, H 100/1, O 10/1  
**Mass Tolerance :** 1000ppm, 3mmu if m/z > 3  
**Unsaturation (U.S.) :** -0.5 - 20.0

|   | Observed m/z | Int%  | Err [ppm / mmu] | U.S. Composition |
|---|--------------|-------|-----------------|------------------|
| 1 | 420.1572     | 52.63 | -0.2 / -0.1     | 14.0 C25 H24 O6  |

Figure 4. EIMS and HREIMS data of compound 2

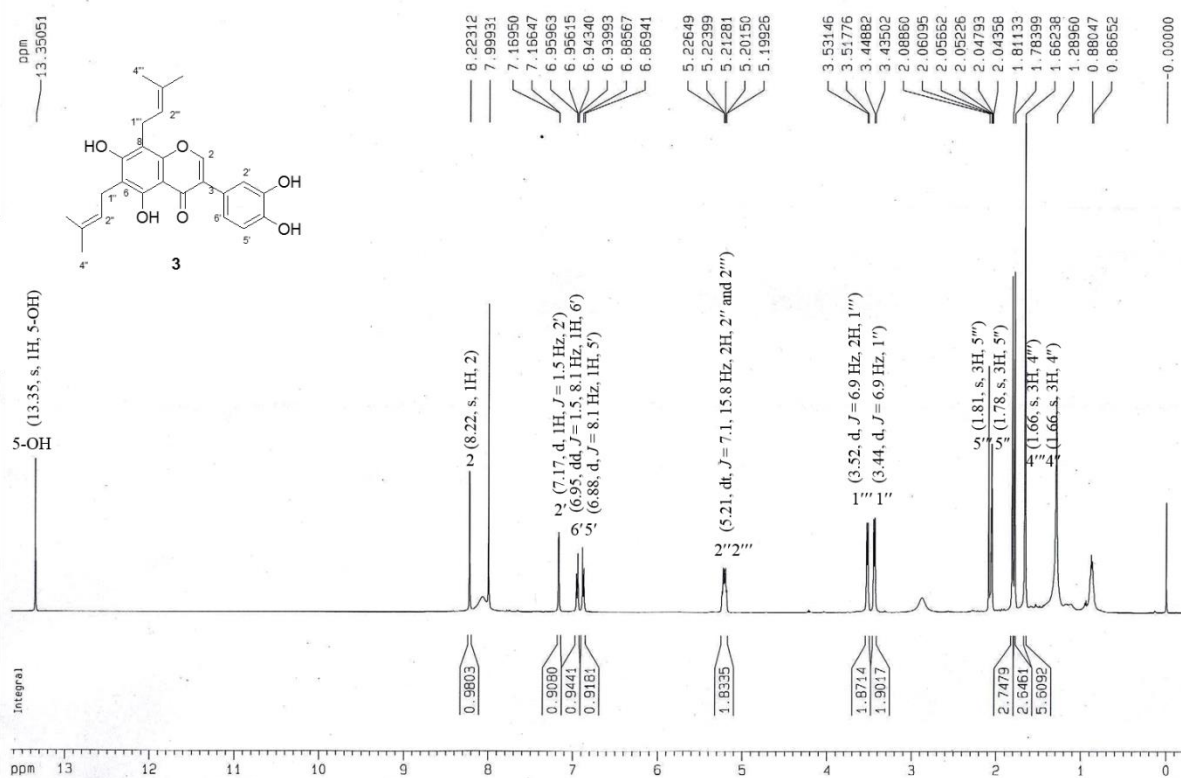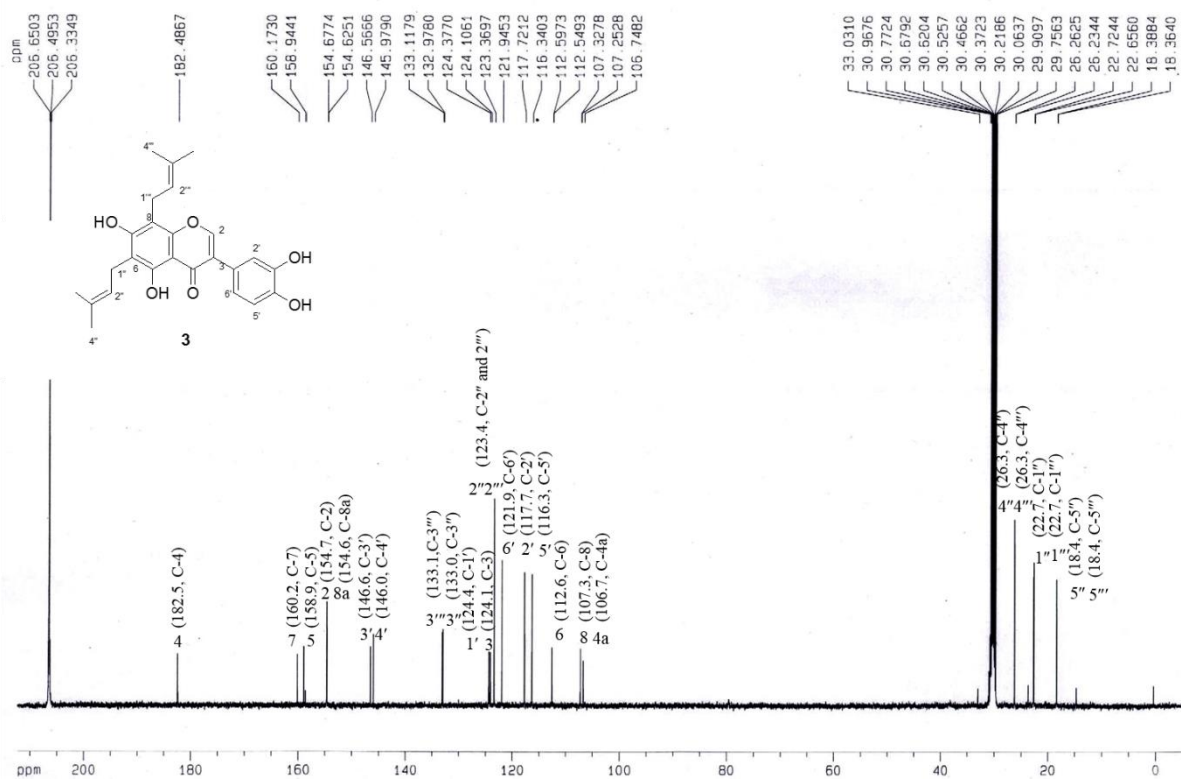

Figure 5.  $^1\text{H}$  (500 MHz) and  $^{13}\text{C}$ -NMR (125 MHz) spectrums of compound 3 (Acetone- $d_6$ )

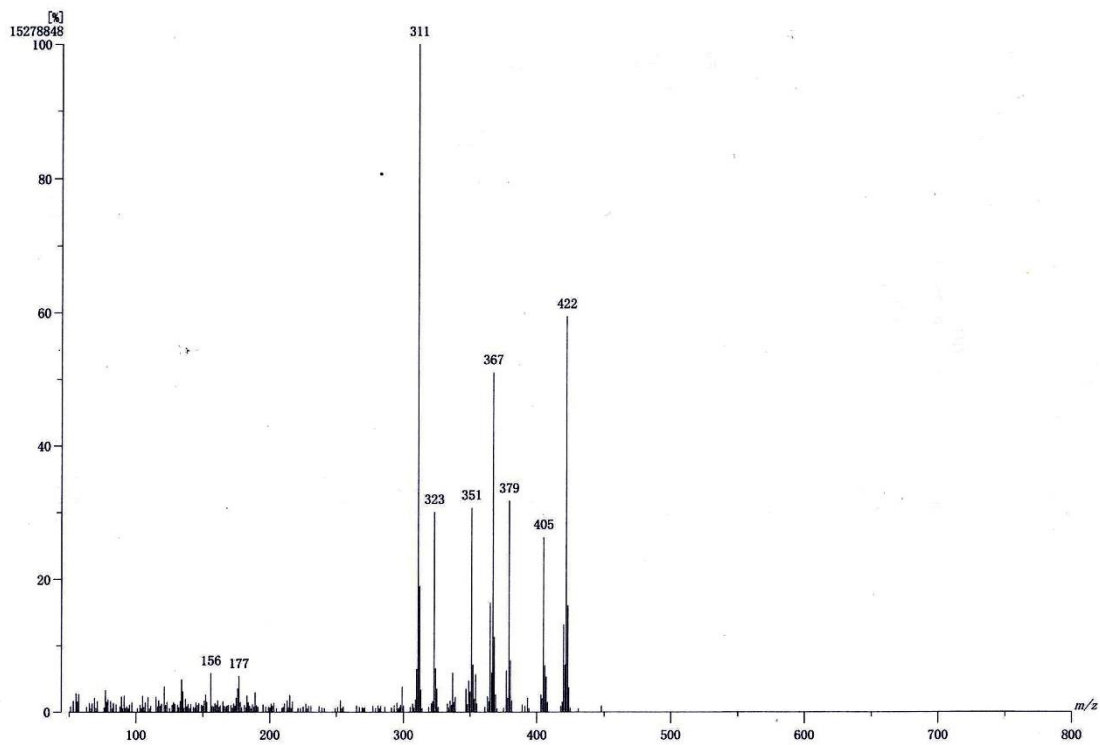

Instrument : MStation

Sample : -

Note : -

Inlet : Direct Ion Mode : EI+

RT : 2.37 min Scan# : 72

Elements : C 100/1, H 100/1, O 10/1

Mass Tolerance : 1000ppm, 3mmu if m/z > 3

Unsaturation (U.S.) : -0.5 - 20.0

| Observed m/z | Int%   | Err [ppm / mmu] | U.S. Composition |
|--------------|--------|-----------------|------------------|
| 1 422.1728   | 100.00 | -0.3 / -0.1     | 13.0 C25 H26 O6  |

Figure 6. EIMS and HREIMS data of compound 3

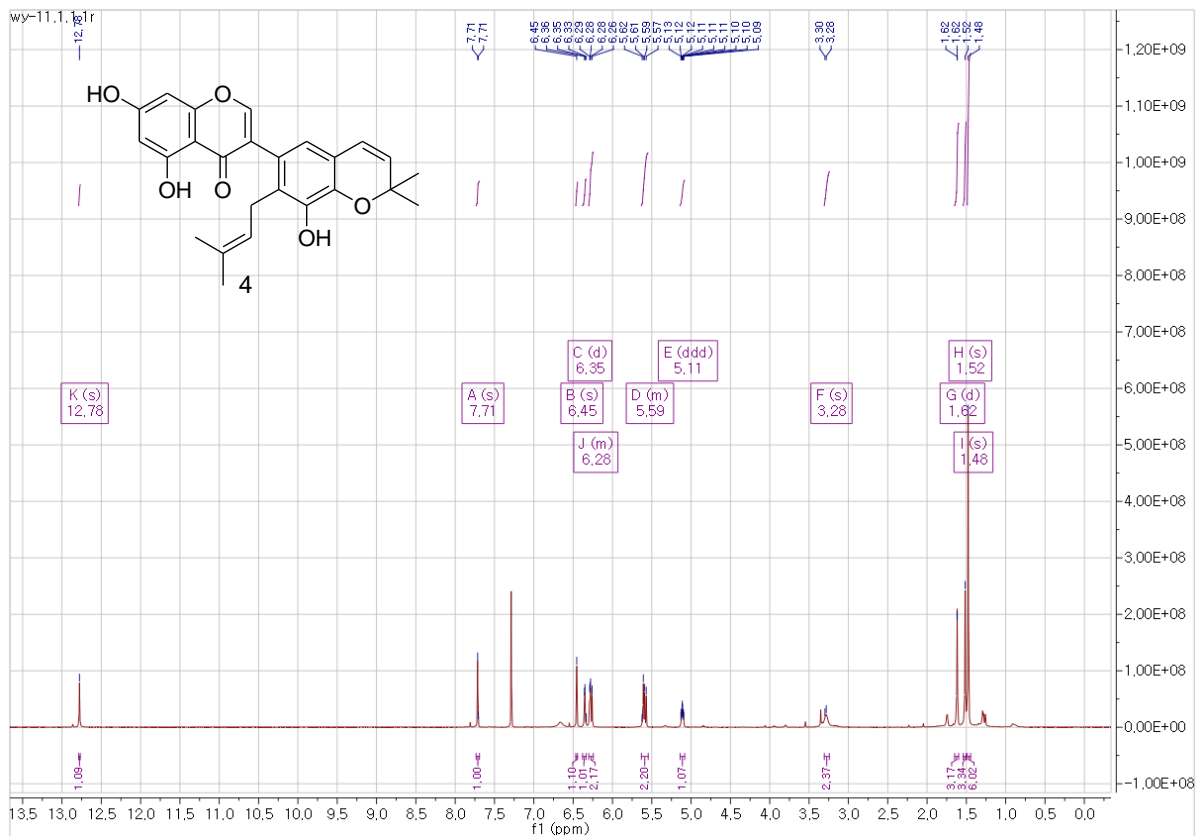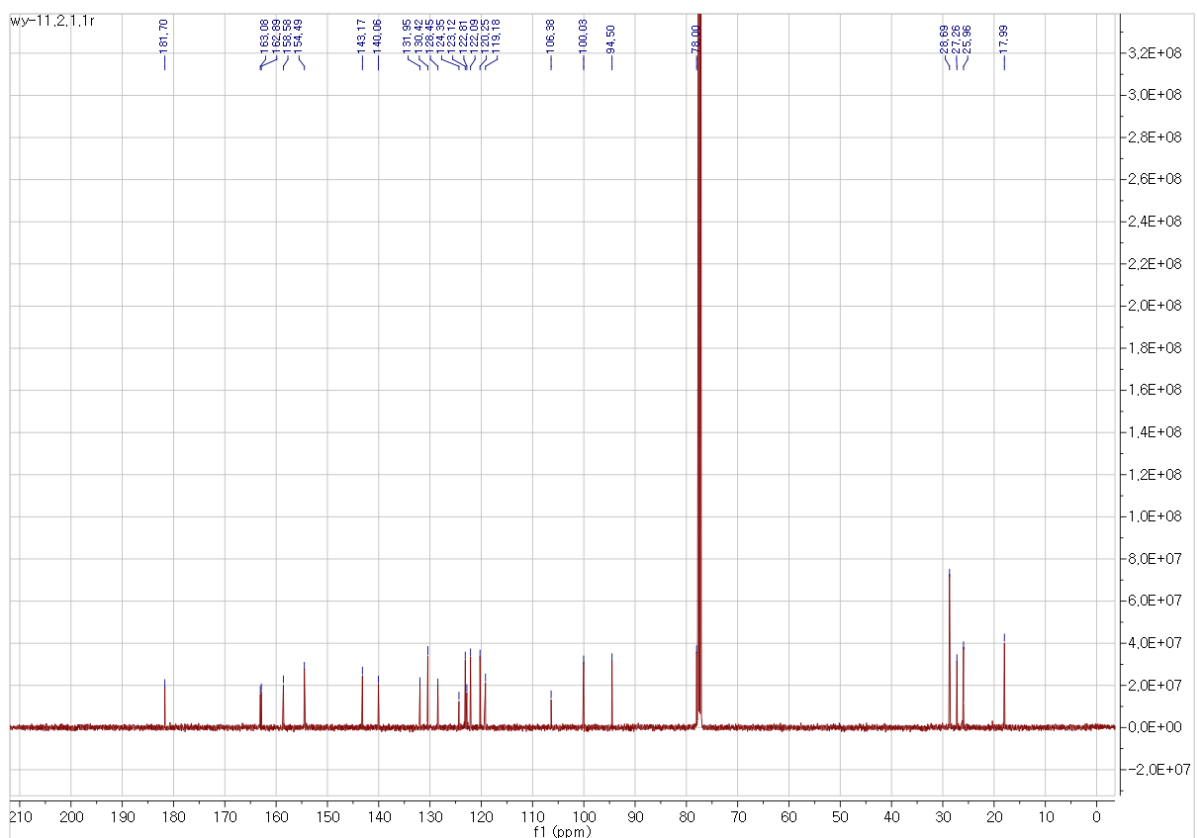

**Figure 7.** <sup>1</sup>H-NMR (500 MHz) and <sup>13</sup>C-NMR (125 MHz) spectrums of compound **4** (CDCl<sub>3</sub>)

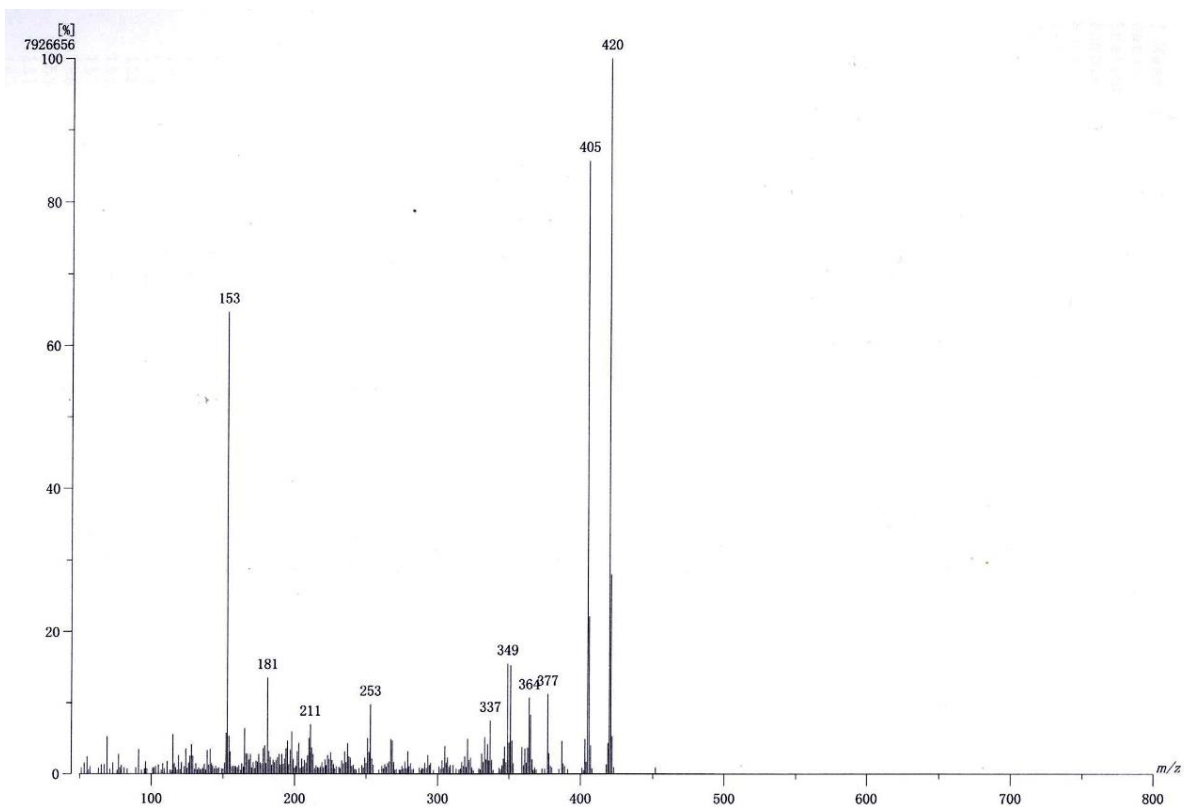

Instrument : MStation

Sample : -

Note : -

Inlet : Direct Ion Mode : EI+

RT : 3.14 min Scan# : 95

Elements : C 100/1, H 100/1, O 10/1

Mass Tolerance : 1000ppm, 3mmu if m/z > 3

Unsaturation (U.S.) : -0.5 - 20.0

| Observed m/z | Int%  | Err [ppm / mmu] | U.S. Composition |
|--------------|-------|-----------------|------------------|
| 1 420.1573   | 38.36 | +0.0 / +0.0     | 14.0 C25 H24 O6  |

Figure 8. EIMS and HREIMS data of compound 4

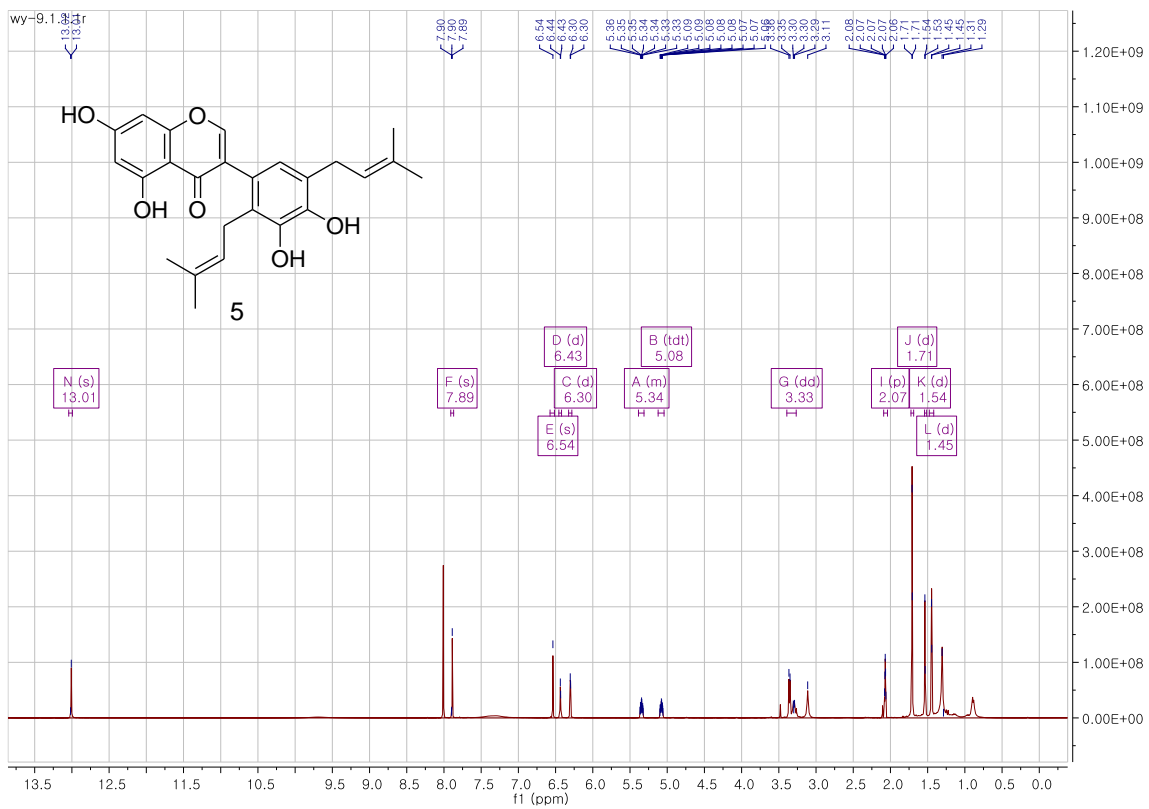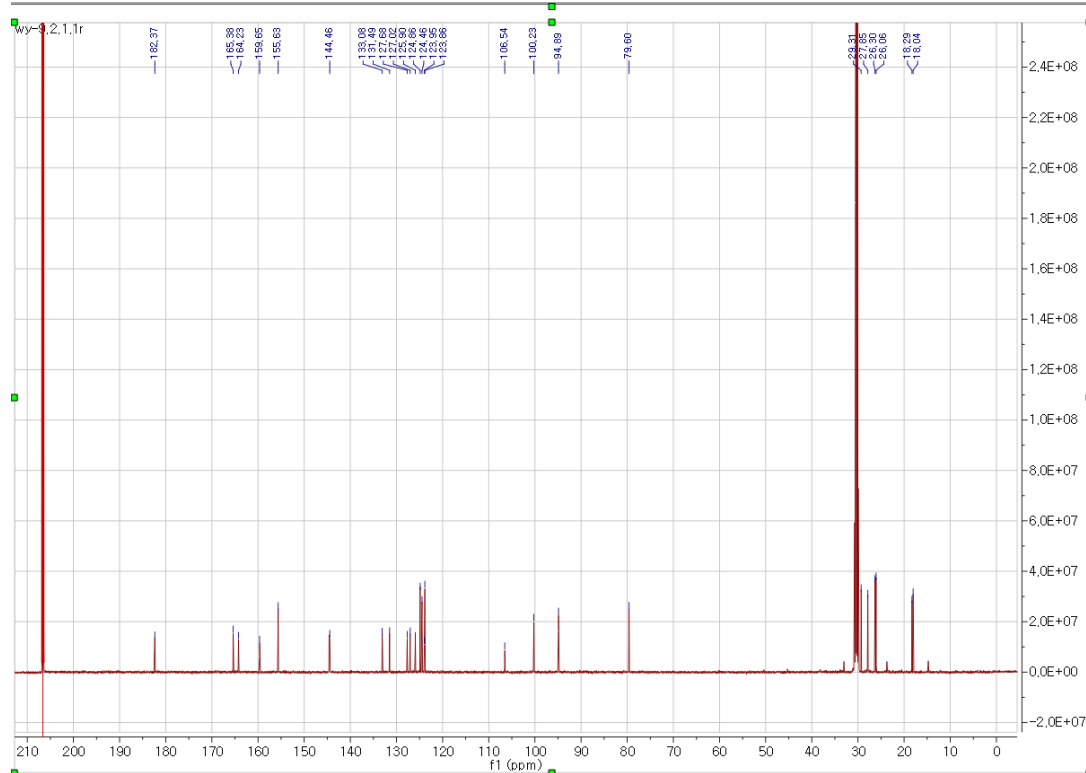

Figure 9.  $^1\text{H}$ -NMR (500 MHz) and  $^{13}\text{C}$ -NMR (125 MHz) spectrums of compound 5 (Acetone- $d$ )



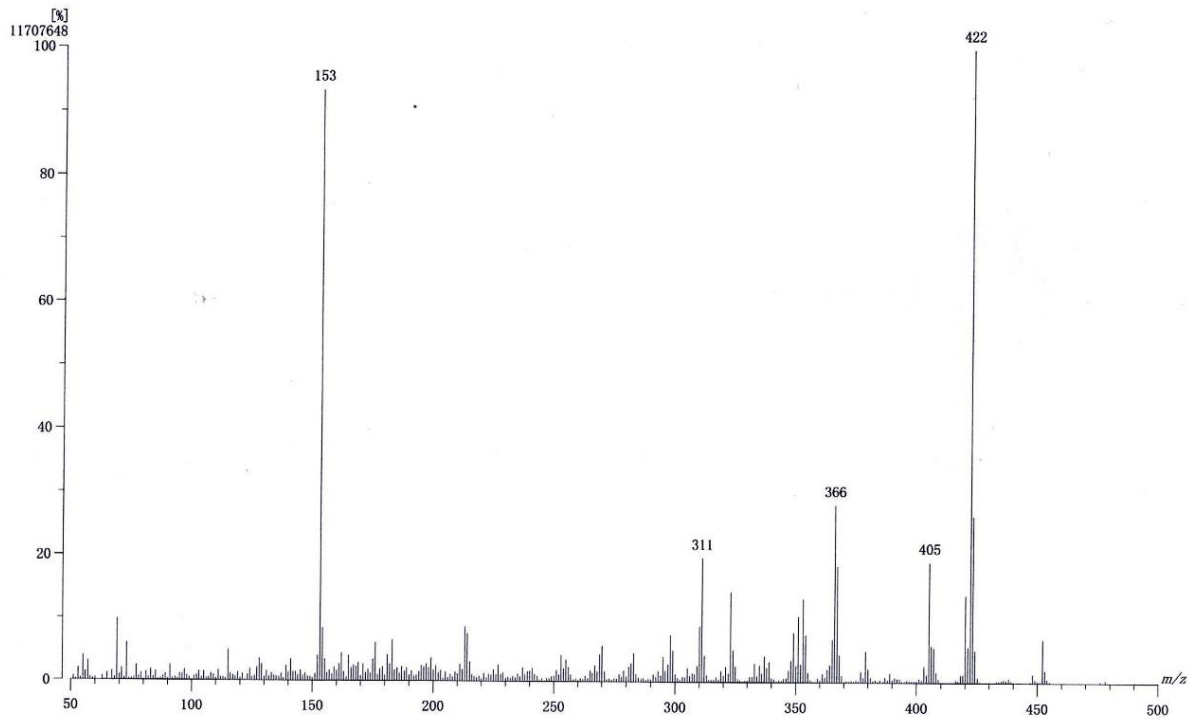

Sample: -  
 Note: -  
 Inlet: Direct  
 RT: 2.65 min  
 Elements: C 100/1, H 100/1, O 10/1  
 Mass Tolerance: 3mmu  
 Unsaturation (U.S.): 0.0 - 20.0  
 Ion Mode: EI+  
 Scan#: 54

| Observed m/z | Int%  | Err [ppm / mmu] | U.S. | Composition   |
|--------------|-------|-----------------|------|---------------|
| 422.1727     | 100.0 | -0.6 / -0.3     | 13.0 | C 25 H 26 O 6 |

**Figure 10.** EIMS and HREIMS data of compound **5**

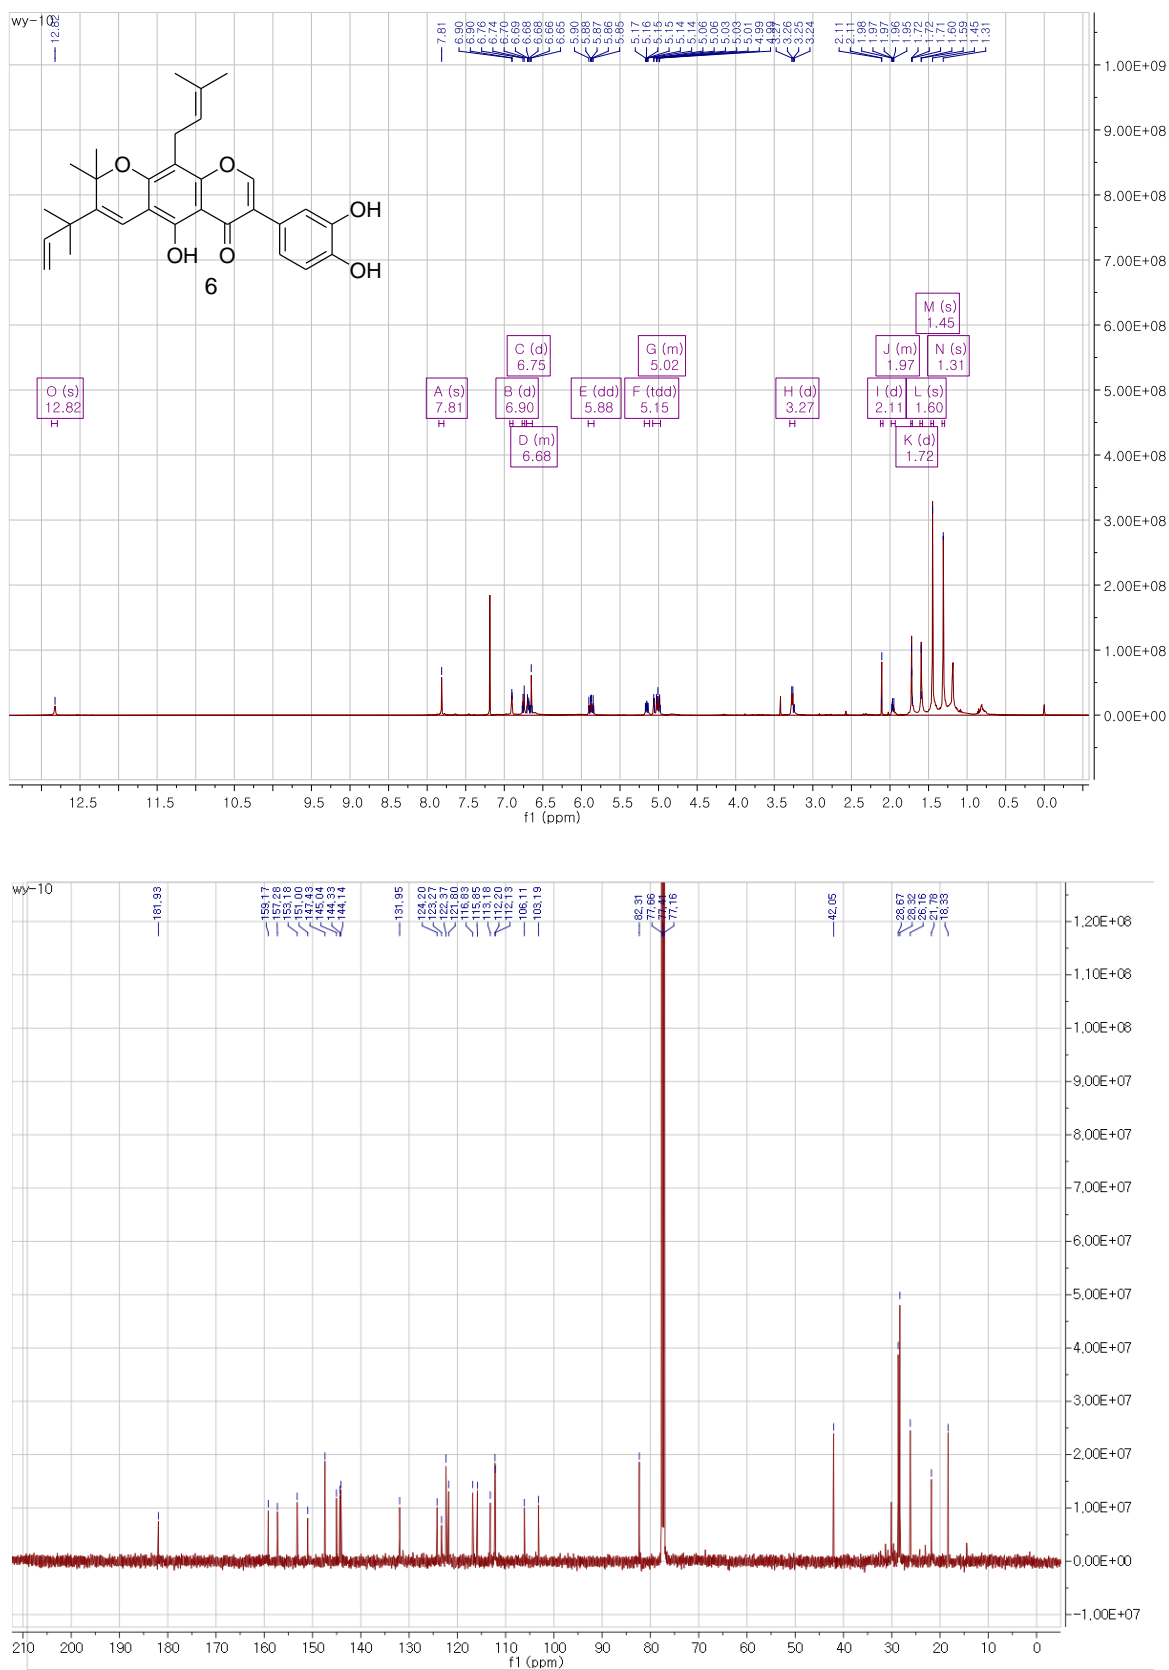

**Figure 11.** <sup>1</sup>H-NMR (500 MHz) and <sup>13</sup>C-NMR (125 MHz) spectrums of compound **6** (CDCl<sub>3</sub>)

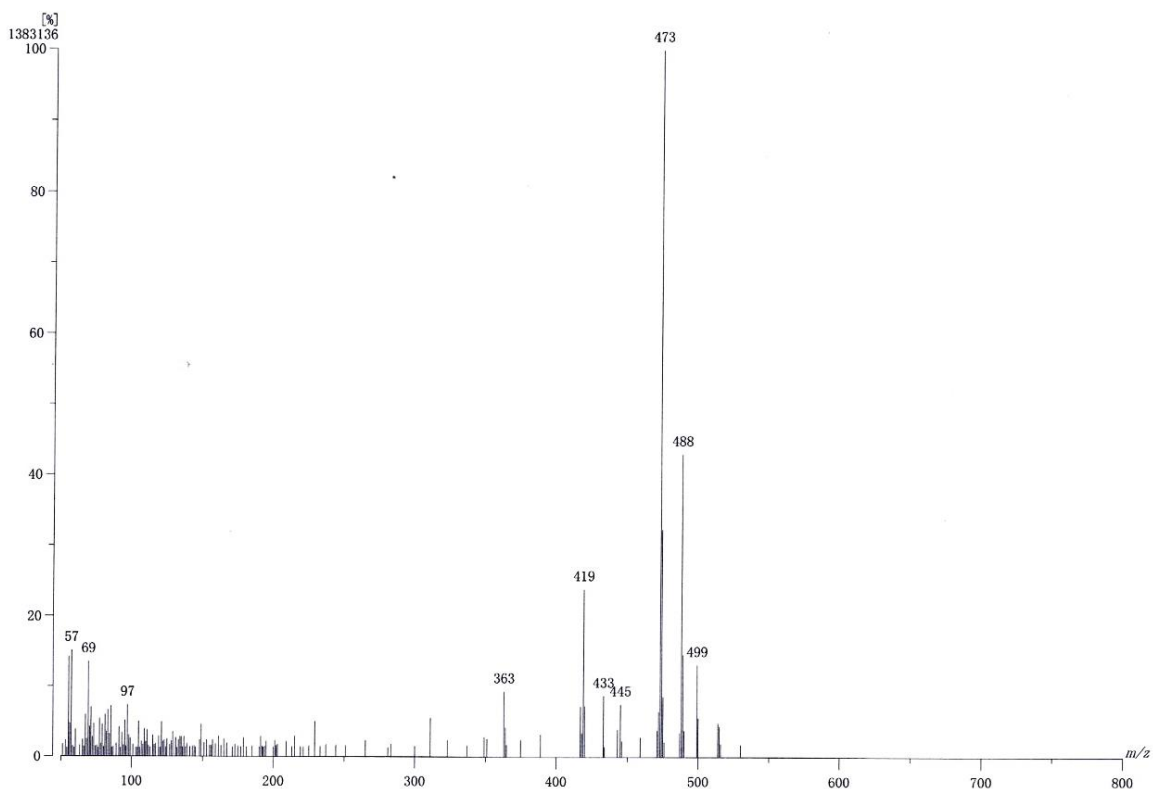

Instrument : MStation

Sample : -

Note : -

Inlet : Direct Ion Mode : EI+

RT : 1.14 min Scan# : 35

Elements : C 100/1, H 100/1, O 10/1

Mass Tolerance : 1000ppm, 3mmu if m/z > 3

Unsaturation (U.S.) : -0.5 - 20.0

|   | Observed m/z | Int%  | Err [ppm / mmu] | U.S. Composition |
|---|--------------|-------|-----------------|------------------|
| 1 | 488.2199     | 70.20 | +0.0 / +0.0     | 15.0 C30 H32 O6  |

**Figure 12.** EIMS and HREIMS data of compound **6**

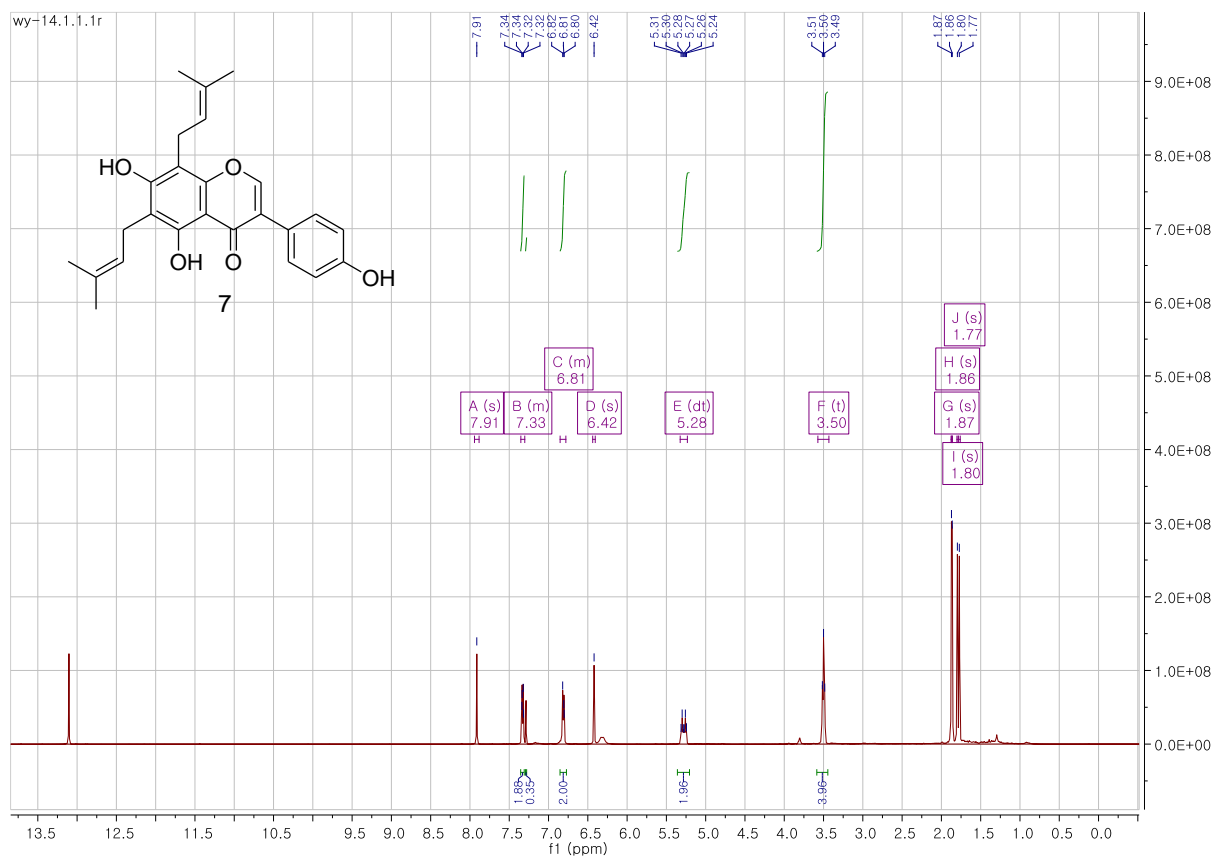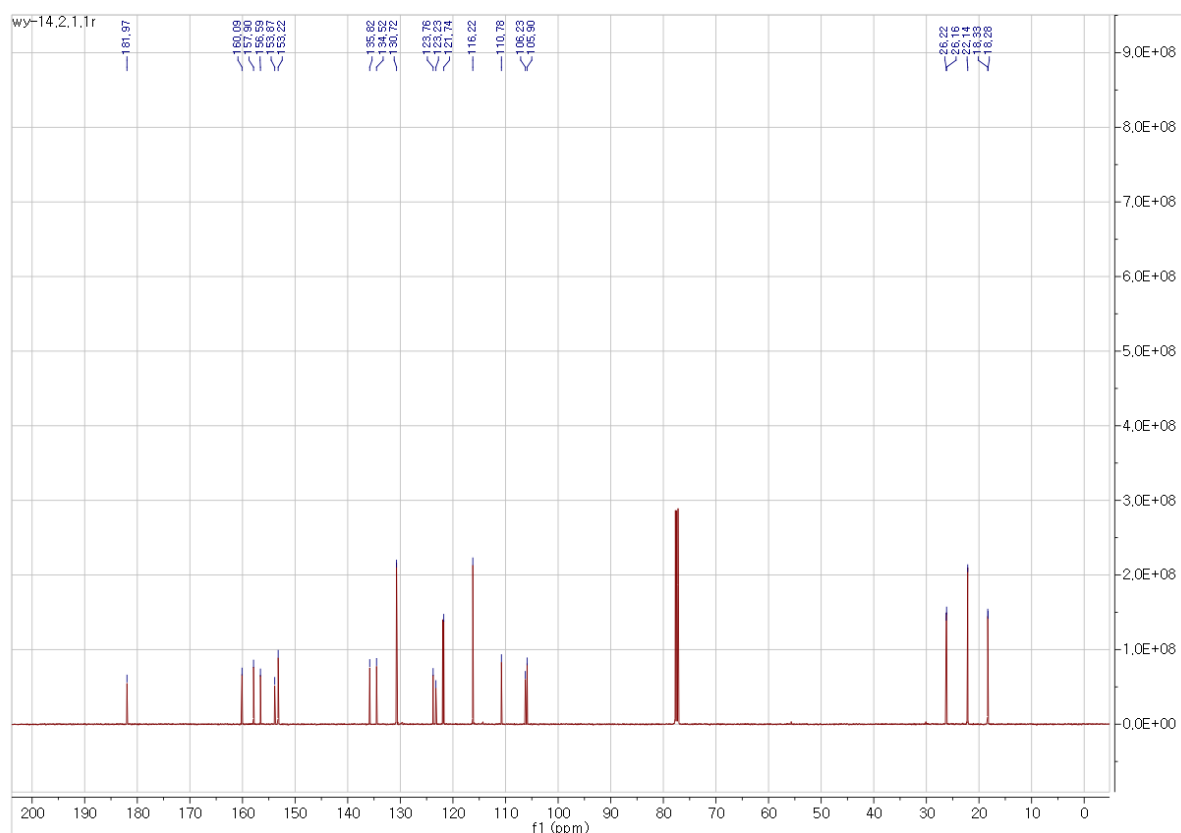

**Figure 13.**  $^1\text{H}$ -NMR (500 MHz) and  $^{13}\text{C}$ -NMR (125 MHz) spectrums of compound **7** ( $\text{CDCl}_3$ )

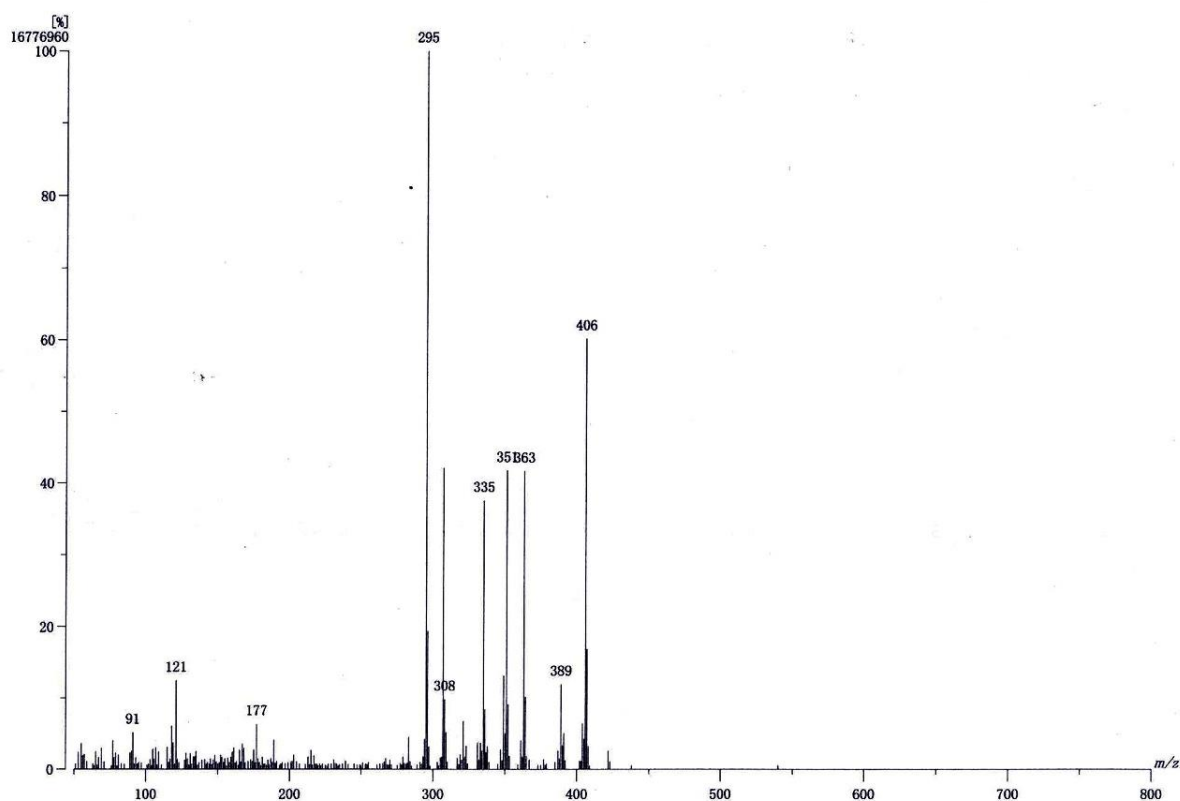

Instrument : MStation

Sample : -

Note : -

Inlet : Direct Ion Mode : EI+

RT : 0.80 min Scan# : 25

Elements : C 100/1, H 100/1, O 10/1

Mass Tolerance : 1000ppm, 3mmu if m/z > 3

Unsaturation (U.S.) : -0.5 - 20.0

| Observed m/z | Int%  | Err [ppm / mmu] | U.S. Composition |
|--------------|-------|-----------------|------------------|
| 1 406.1780   | 35.09 | -0.1 / -0.0     | 13.0 C25 H26 O5  |

Figure 14. EIMS and HREIMS data of compound 7

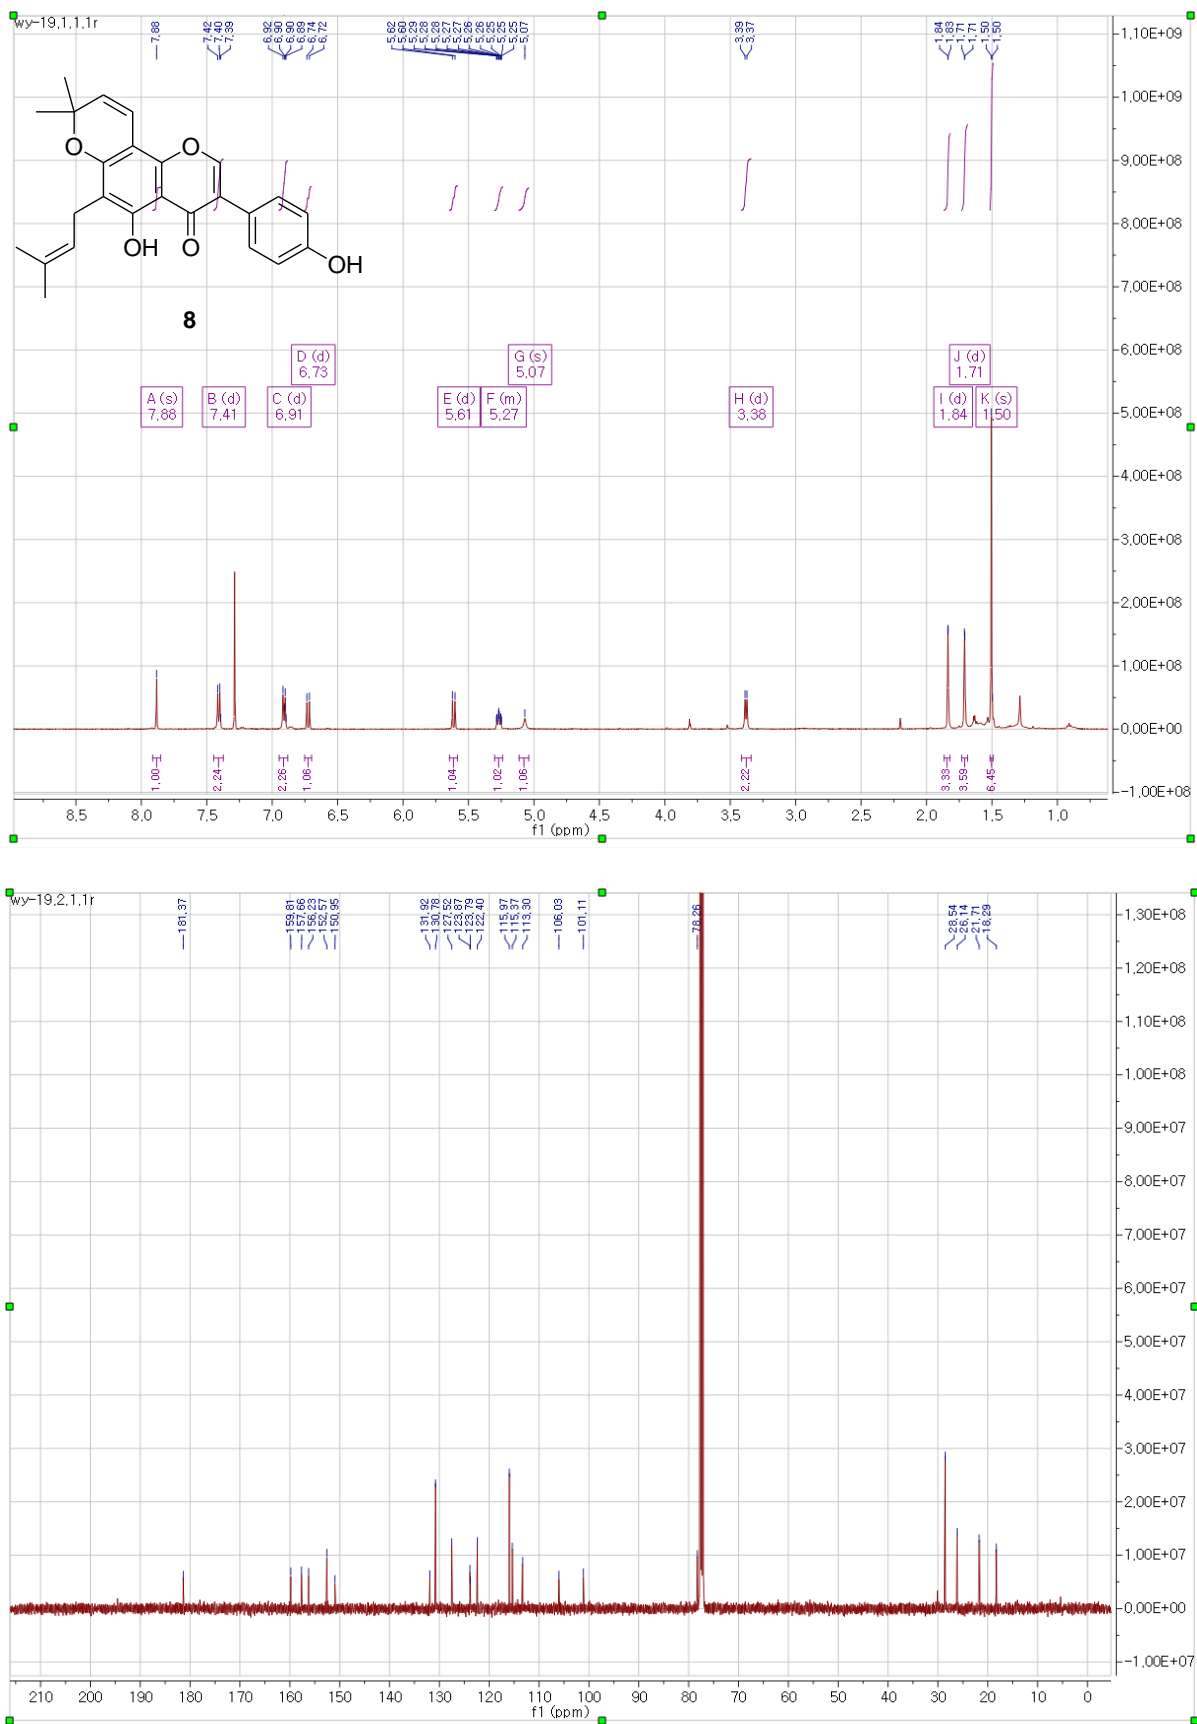

**Figure 15.** <sup>1</sup>H-NMR (500 MHz) and <sup>13</sup>C-NMR (125 MHz) spectrums of compound **8** (CDCl<sub>3</sub>)

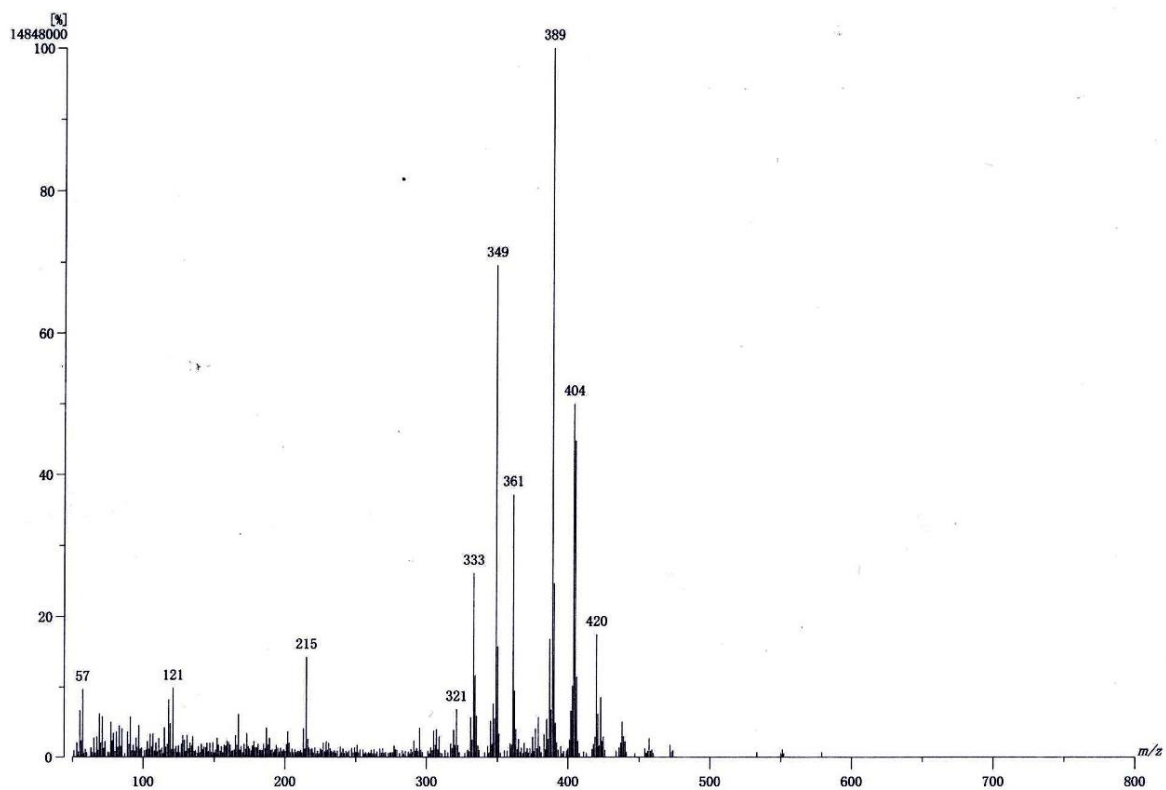

Instrument : MStation

Sample : -

Note : -

Inlet : Direct Ion Mode : EI+

RT : 3.30 min Scan# : 100

Elements : C 100/1, H 100/1, O 10/1

Mass Tolerance : 1000ppm, 3mmu if m/z > 3

Unsaturation (U.S.) : -0.5 - 20.0

|   | Observed m/z | Int%  | Err [ppm / mmu] | U.S. Composition |
|---|--------------|-------|-----------------|------------------|
| 1 | 404.1621     | 53.53 | -0.7 / -0.3     | 14.0 C25 H24 O5  |

Figure 16. EIMS and HREIMS data of compound 8

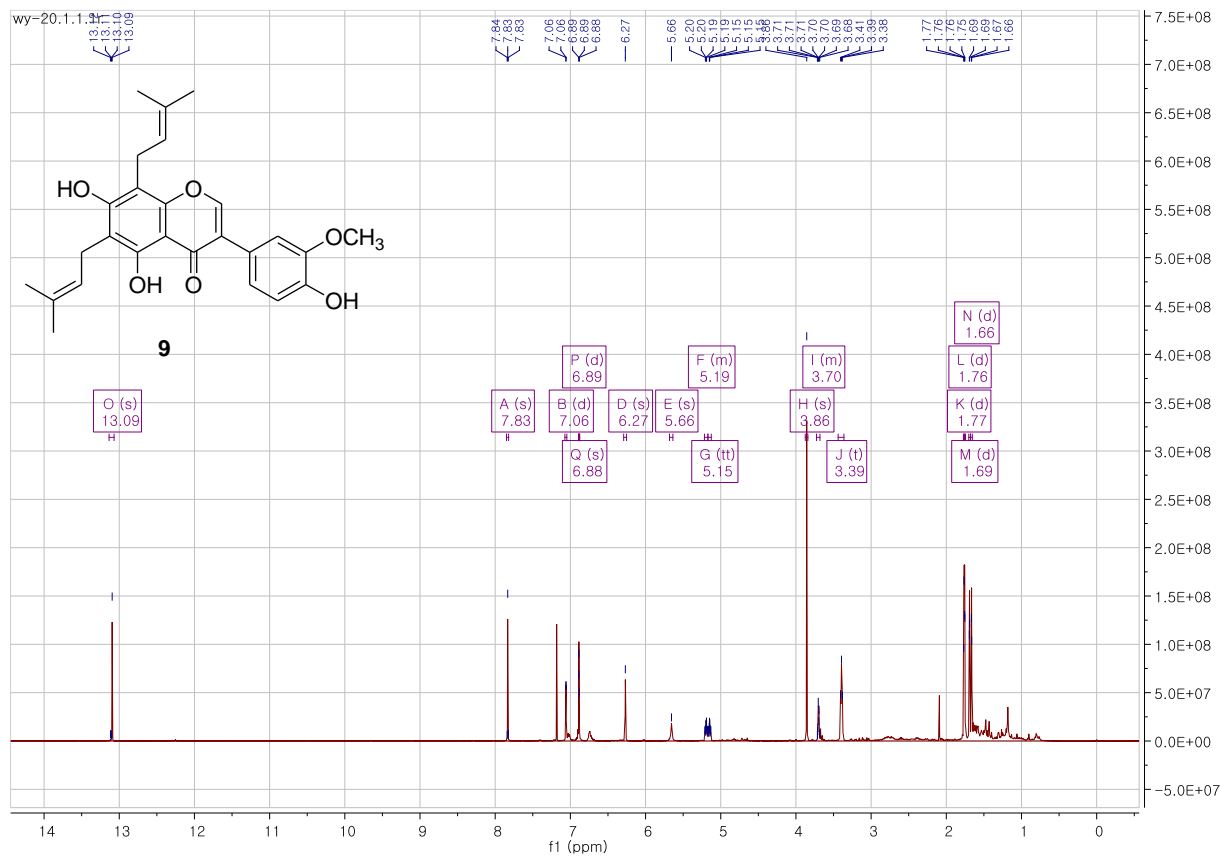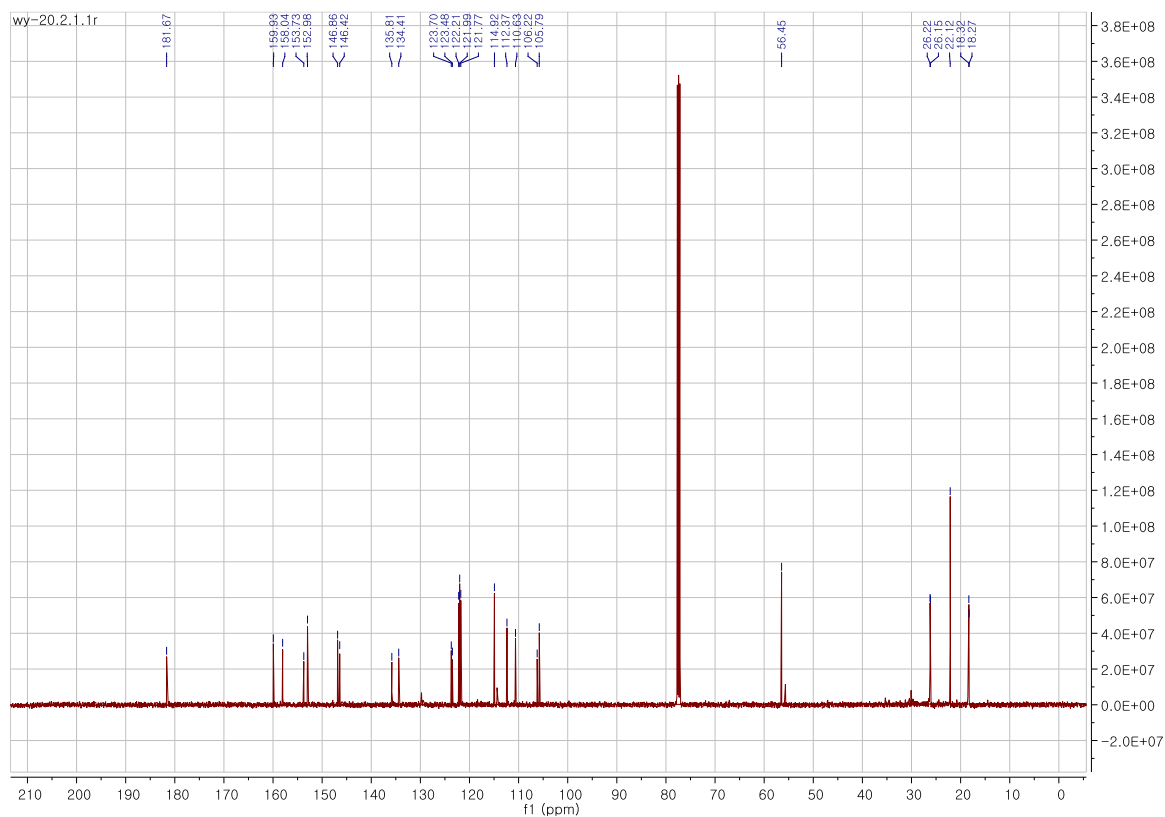

**Figure 17.**  $^1\text{H}$ -NMR (500 MHz) and  $^{13}\text{C}$ -NMR (125 MHz) spectrums of compound **9** ( $\text{CDCl}_3$ )



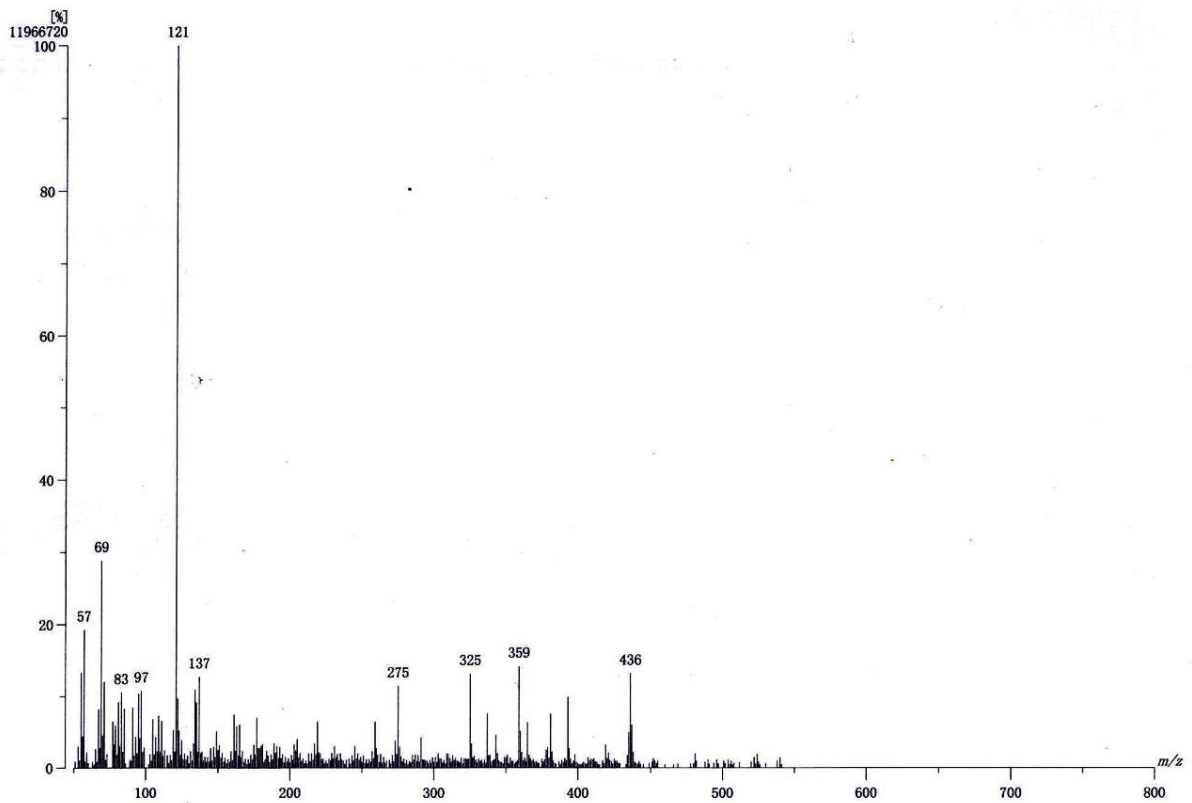

Instrument : MStation

Sample : -

Note : -

Inlet : Direct Ion Mode : EI+

RT : 0.64 min Scan# : 20

Elements : C 100/1, H 100/1, O 10/1

Mass Tolerance : 1000ppm, 3mmu if m/z > 3

Unsaturation (U.S.) : -0.5 - 20.0

| Observed m/z | Int%  | Err [ppm / mmu] | U.S. Composition |
|--------------|-------|-----------------|------------------|
| 1 436.1888   | 54.16 | +0.5 / +0.2     | 13.0 C26 H28 O6  |

Figure 18. EIMS and HREIMS data of compound 9

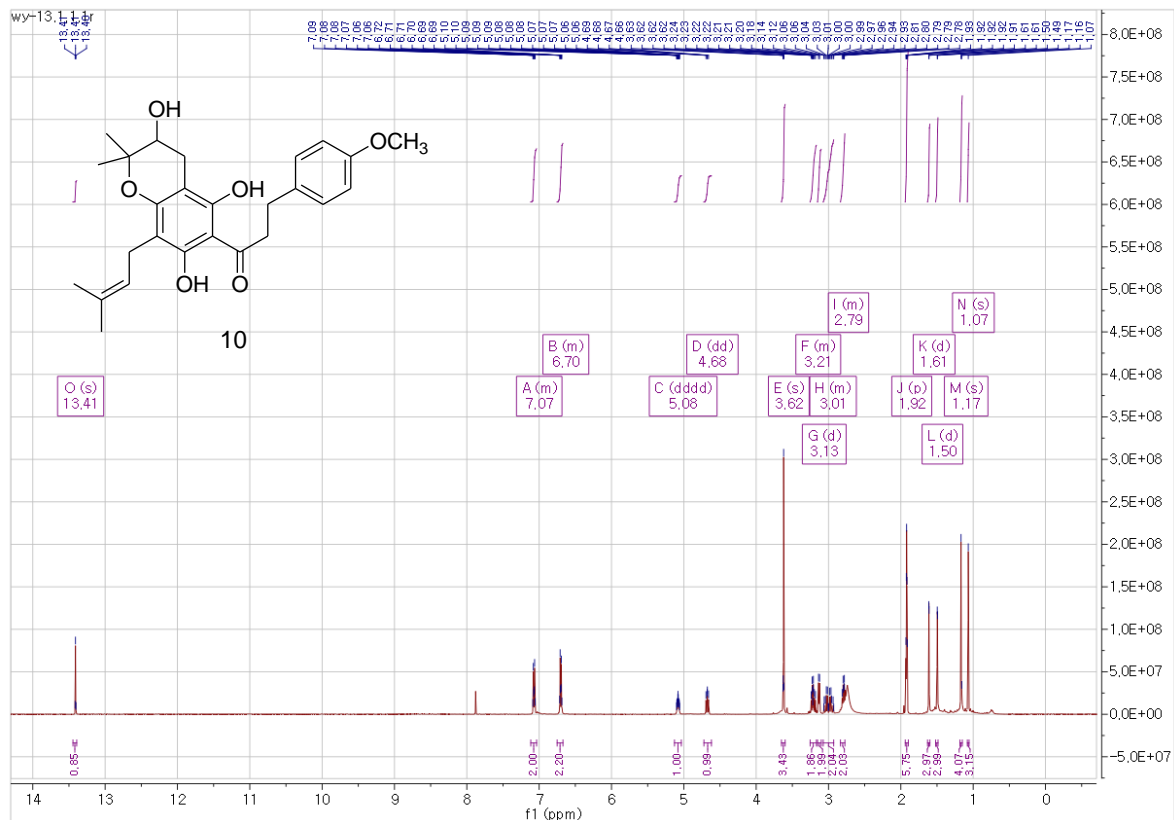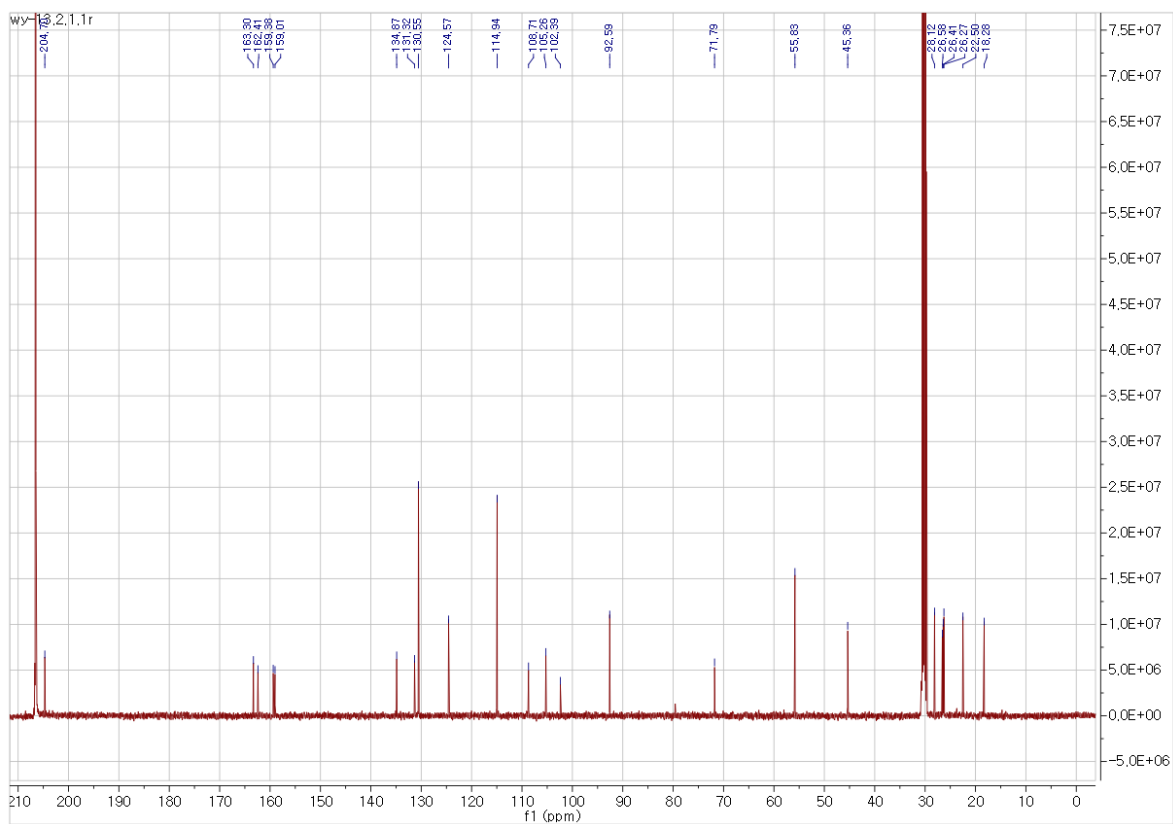

**Figure 19.**  $^1\text{H-NMR}$  (500 MHz) and  $^{13}\text{C-NMR}$  (125 MHz) spectrums of compound **10** (Acetone- $d_6$ )

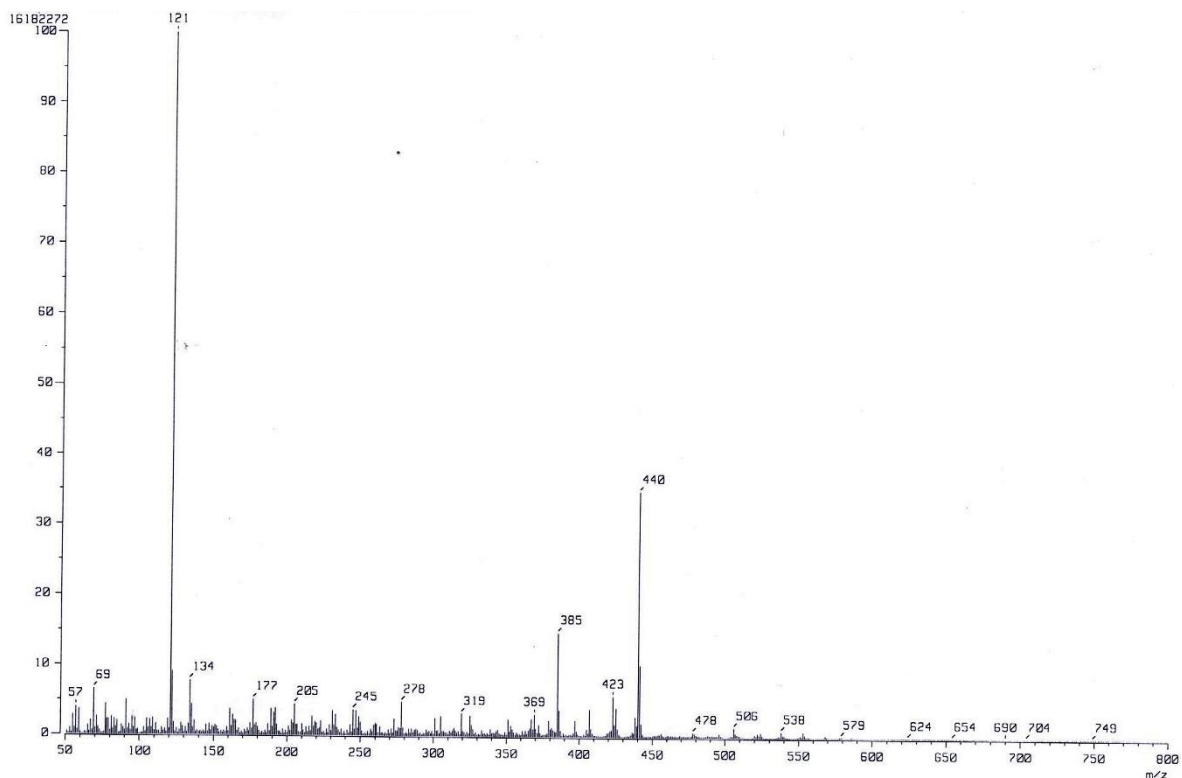

Instrument : MStation

Sample : -

Note : -

Inlet : Direct Ion Mode : EI+

RT : 1.47 min Scan# : 45

Elements : C 100/1, H 100/1, O 10/1

Mass Tolerance : 1000ppm, 3mmu if m/z > 3

Unsaturation (U.S.) : -0.5 - 20.0

| Observed m/z | Int%  | Err [ppm / mmu] | U.S. Composition |
|--------------|-------|-----------------|------------------|
| 1 440.2199   | 53.13 | +0.0 / +0.0     | 11.0 C26 H32 O6  |

Figure 20. EIMS and HREIMS data of compound 10

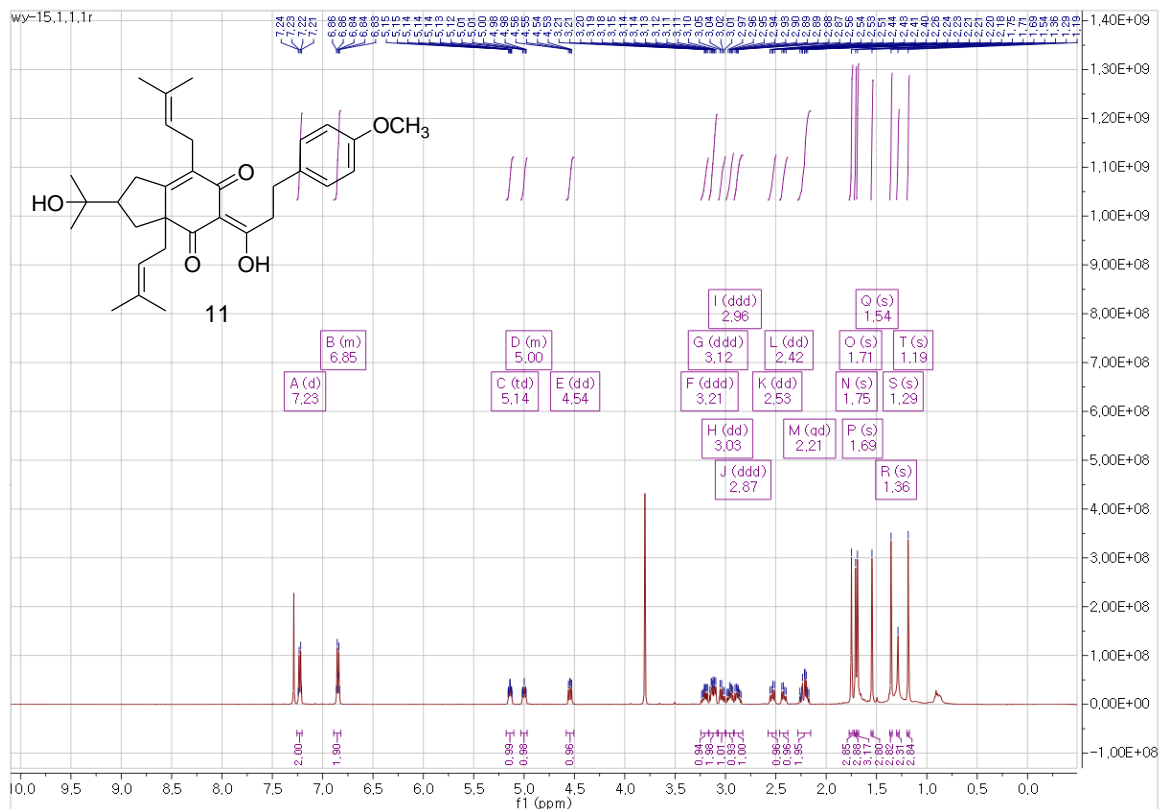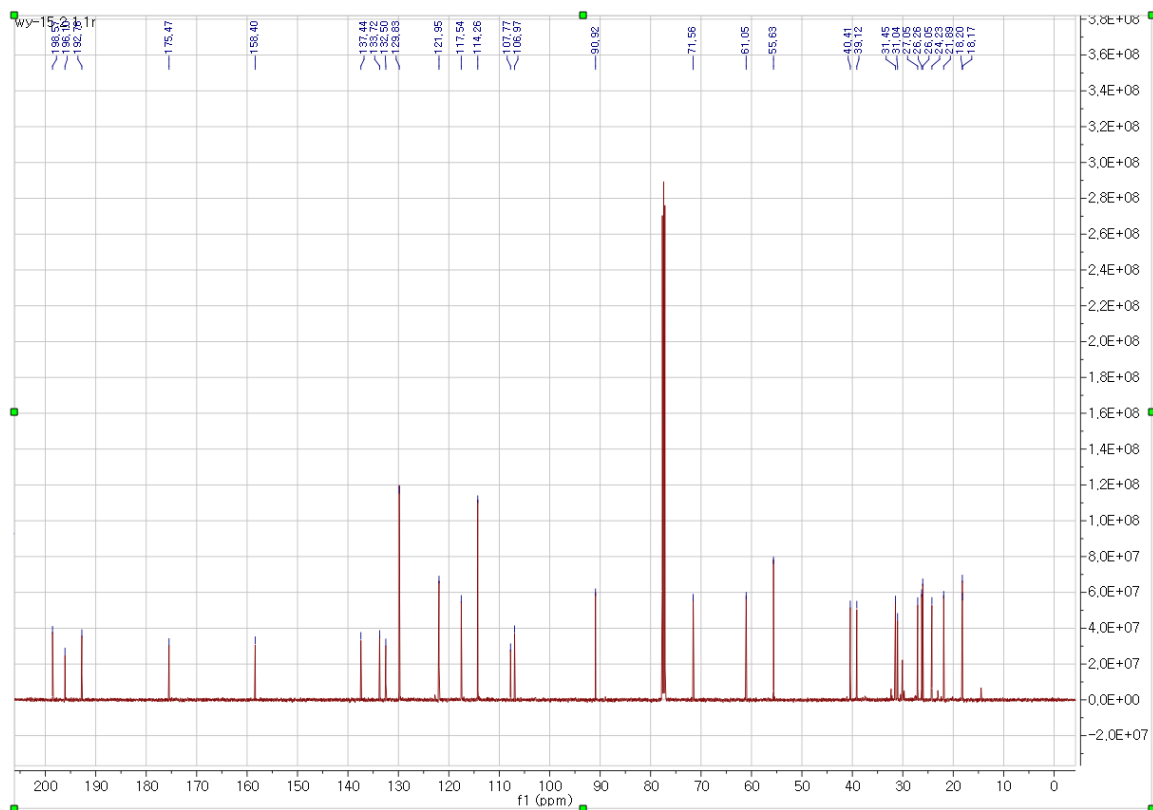

**Figure 21.**  $^1\text{H-NMR}$  (500 MHz) and  $^{13}\text{C-NMR}$  (125 MHz) spectrums of compound **11** ( $\text{CDCl}_3$ )

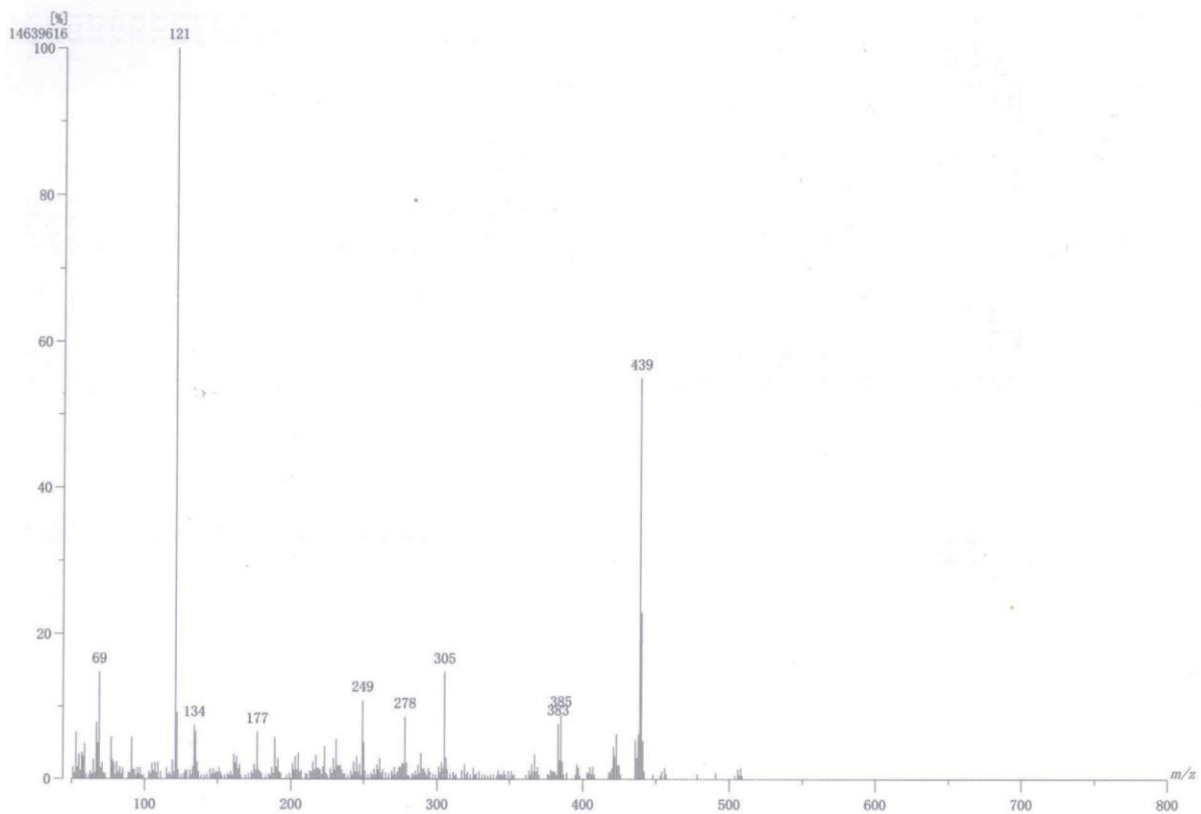

Instrument : MStation

Sample : -

Note : -

Inlet : Direct Ion Mode : EI+

RT : 0.80 min Scan# : 25

Elements : C 100/1, H 100/1, O 10/1

Mass Tolerance : 1000ppm, 3mmu if m/z > 3

Unsaturation (U.S.) : -0.5 - 20.0

| Observed m/z | Int%   | Err [ppm / mmu] | U.S. Composition |
|--------------|--------|-----------------|------------------|
| 1 508.2820   | 100.00 | -1.0 / -0.5     | 12.0 C31 H40 O6  |

**Figure 22.**  $^1\text{H}$ -NMR (500 MHz) and  $^{13}\text{C}$ -NMR (125 MHz) spectrums of compound **11** ( $\text{CDCl}_3$ )

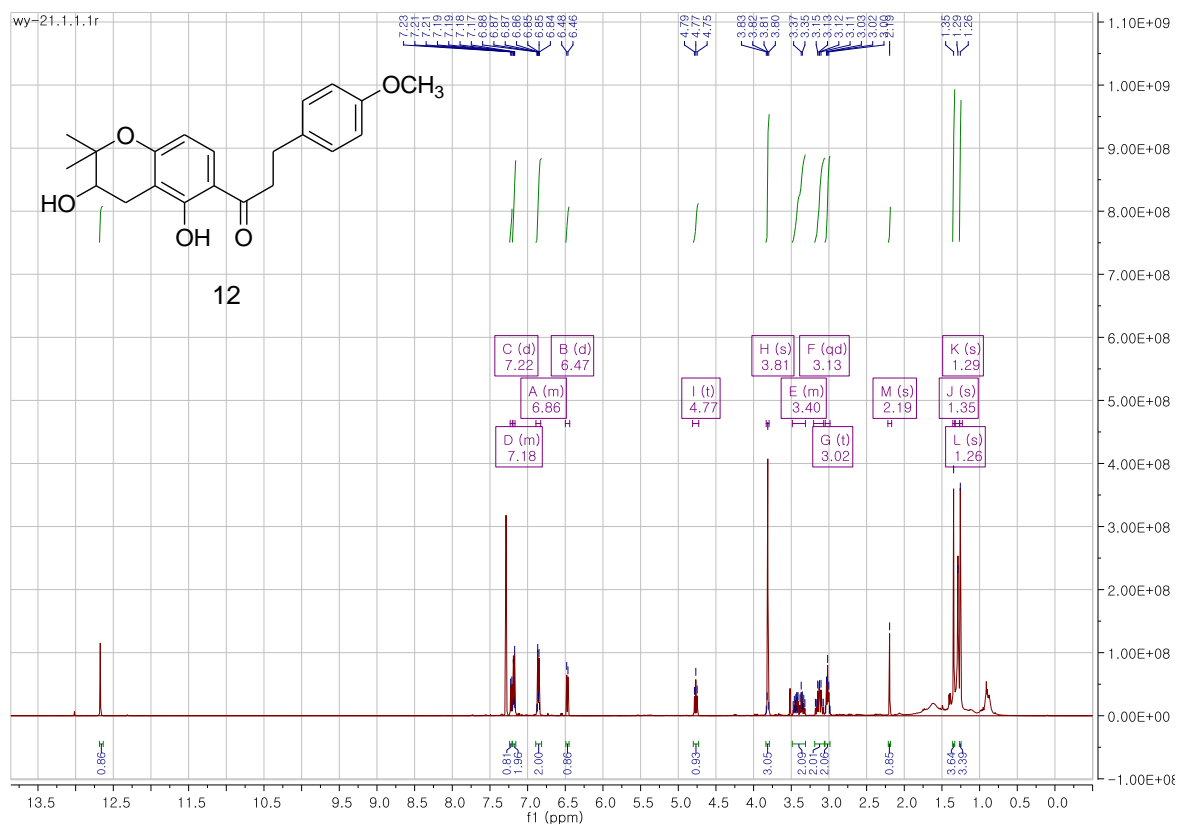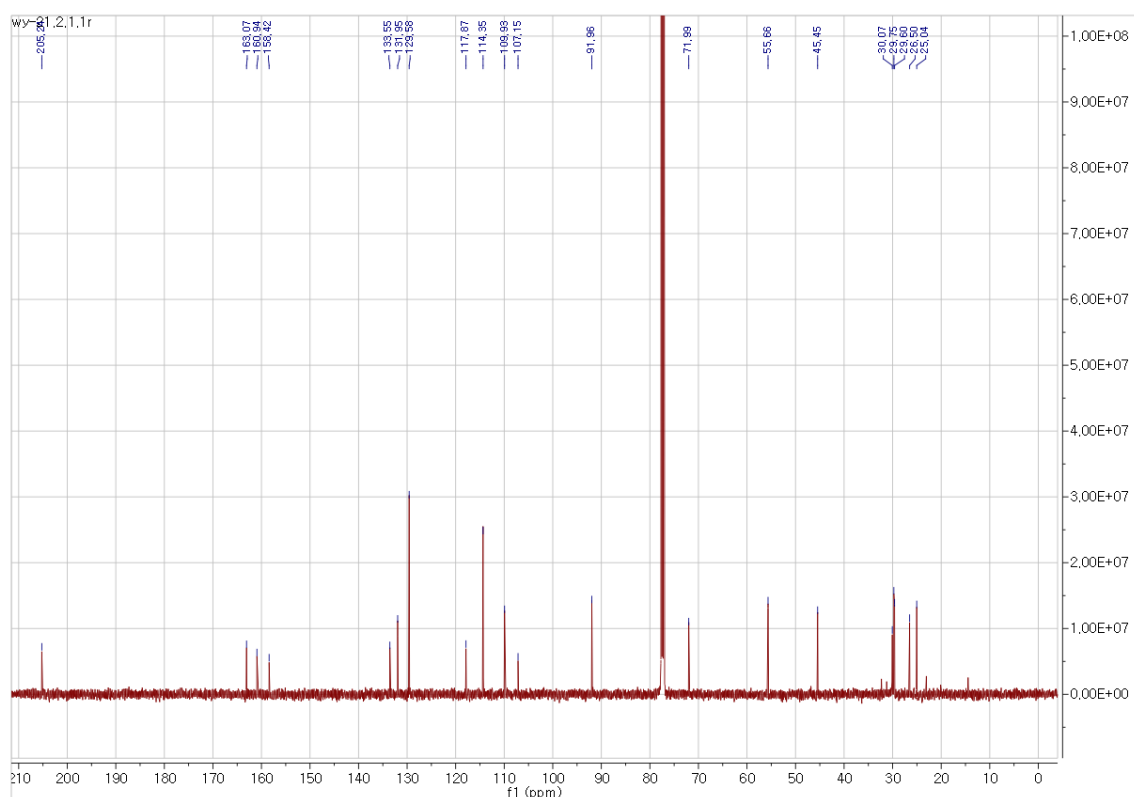

**Figure 23.**  $^1\text{H}$ -NMR (500 MHz) and  $^{13}\text{C}$ -NMR (125 MHz) spectrums of compound **12** ( $\text{CDCl}_3$ )

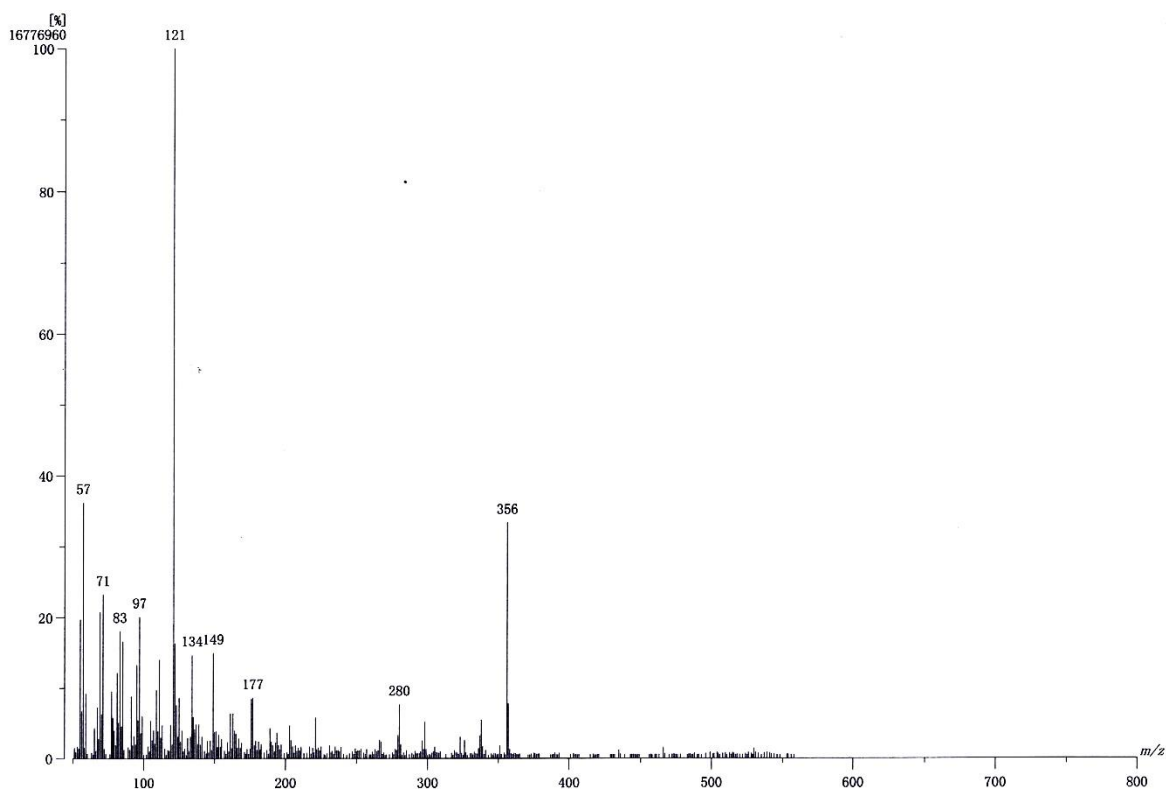

Instrument : MStation

Sample : -

Note : -

Inlet : Direct Ion Mode : EI+

RT : 1.00 min Scan# : 31

Elements : C 100/1, H 100/1, O 10/1

Mass Tolerance : 1000ppm, 3mmu if m/z > 3

Unsaturation (U.S.) : -0.5 - 20.0

| Observed m/z | Int%  | Err [ppm / mmu] | U.S. Composition |
|--------------|-------|-----------------|------------------|
| 1 356.1625   | 61.52 | +0.4 / +0.1     | 10.0 C21 H24 O5  |

**Figure 24.** EIMS and HREIMS data of compound **12**

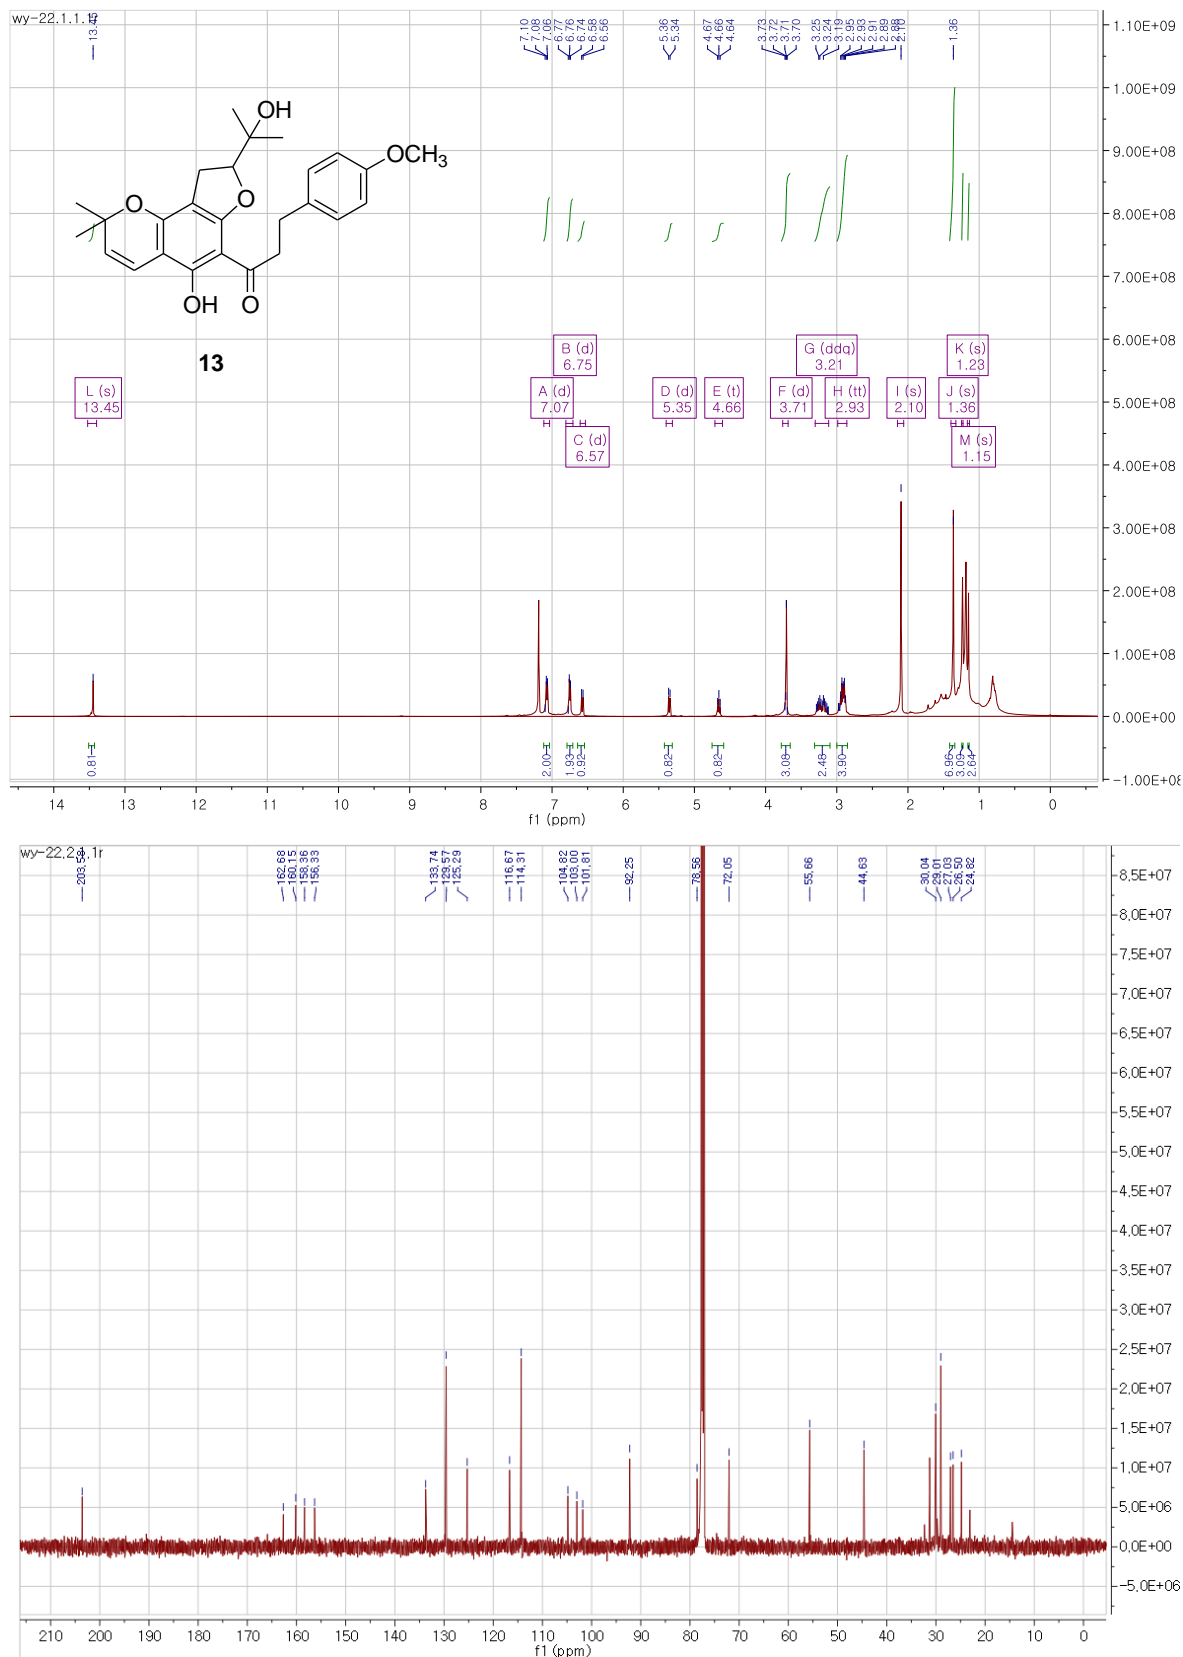

**Figure 25.** <sup>1</sup>H-NMR (500 MHz) and <sup>13</sup>C-NMR (125 MHz) spectrums of compound **13** (CDCl<sub>3</sub>)



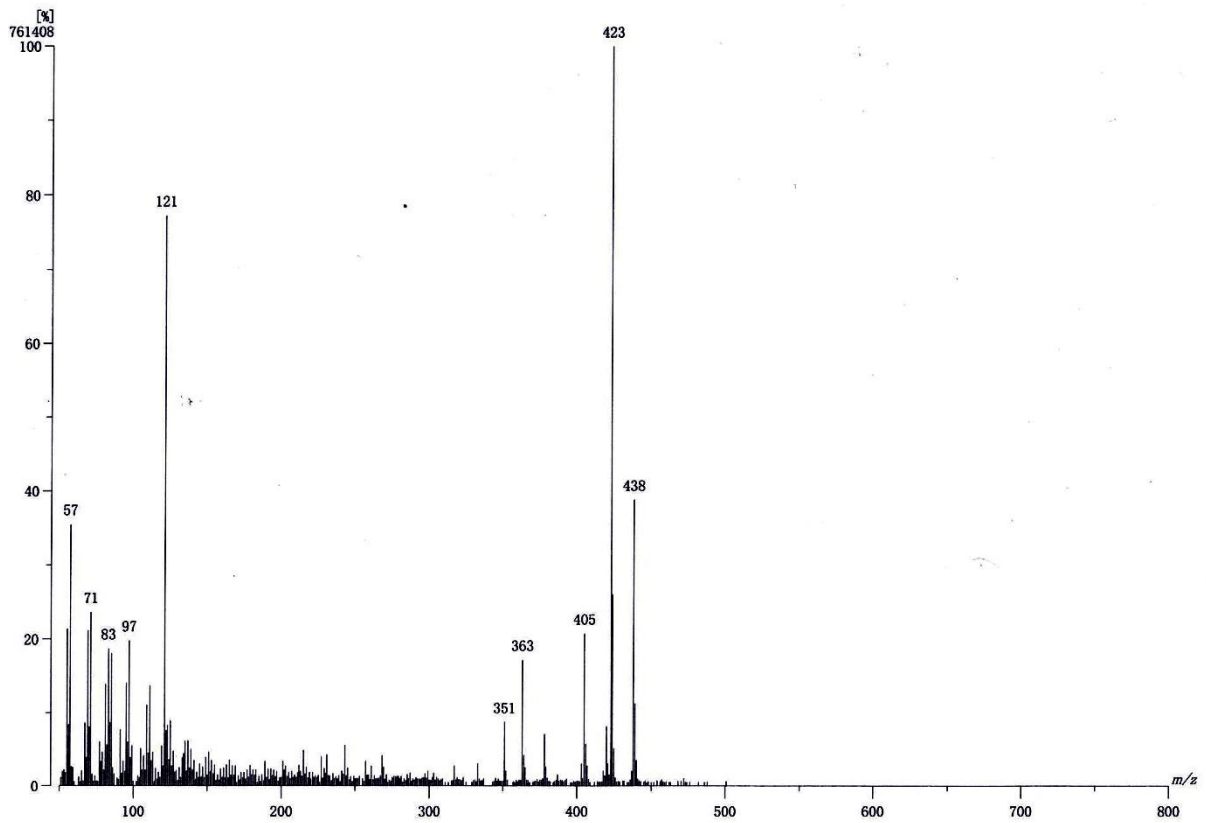

Instrument : MStation  
 Sample : -  
 Note : -  
 Inlet : Direct Ion Mode : EI+  
 RT : 2.64 min Scan# : 80  
 Elements : C 100/1, H 100/1, O 10/1  
 Mass Tolerance : 1000ppm, 3mmu if m/z > 3  
 Unsaturation (U.S.) : -0.5 - 20.0

|   | Observed m/z | Int%  | Err [ppm / mmu] | U.S. Composition |
|---|--------------|-------|-----------------|------------------|
| 1 | 438.2039     | 40.22 | -0.8 / -0.3     | 12.0 C26 H30 O6  |

**Figure 26.** EIMS and HREIMS data of compound **13**

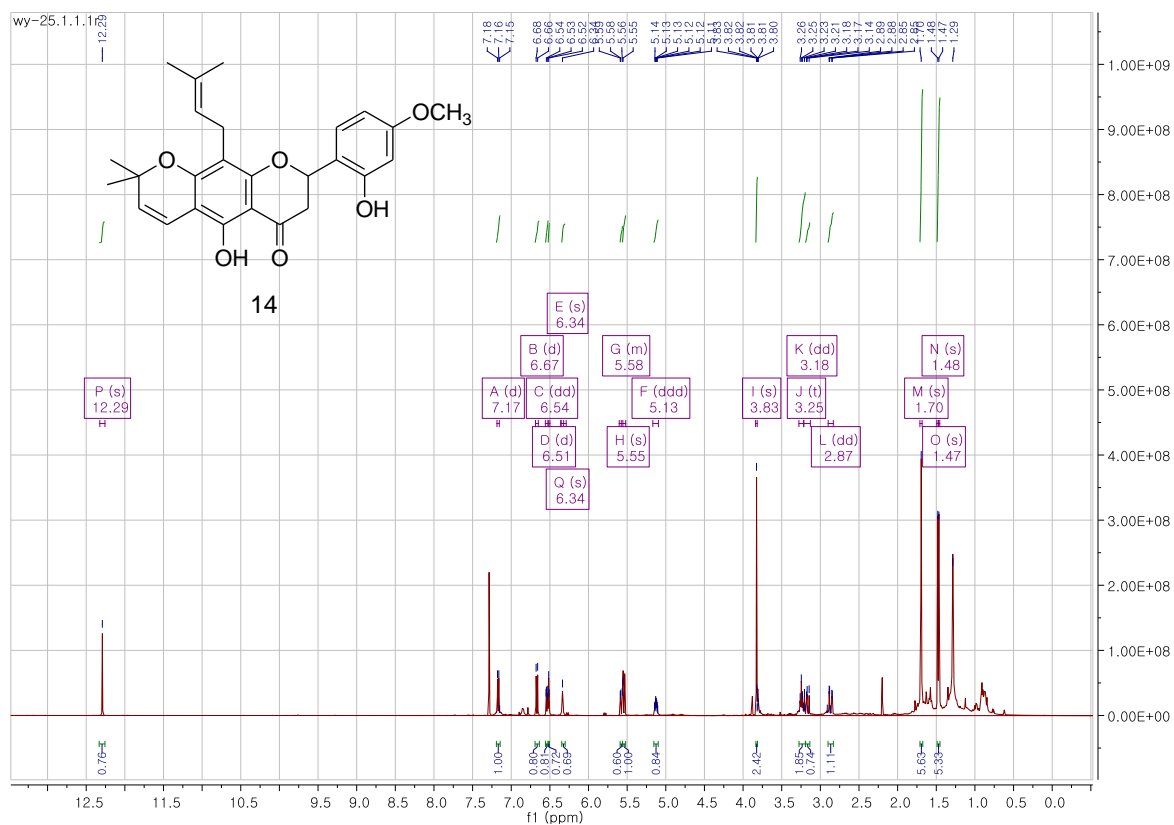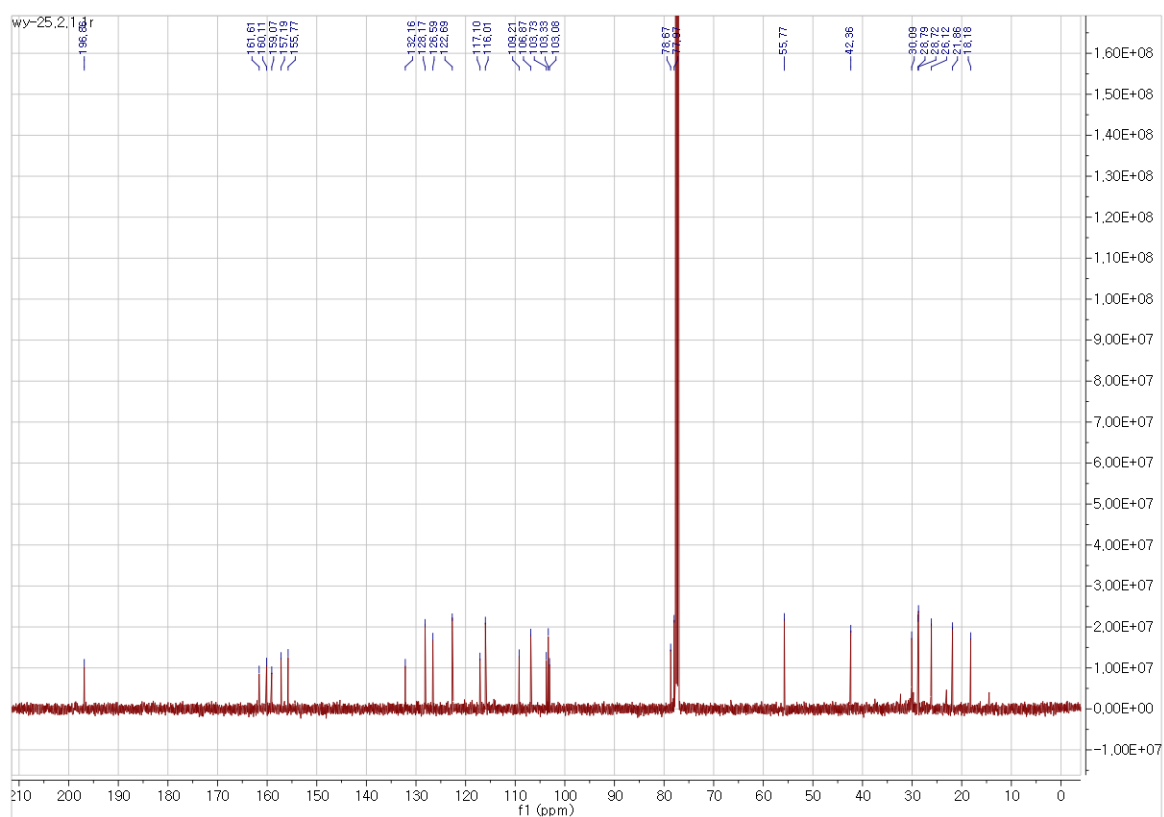

**Figure 27.**  $^1\text{H}$ -NMR (500 MHz) and  $^{13}\text{C}$ -NMR (125 MHz) spectrums of compound **14** ( $\text{CDCl}_3$ )

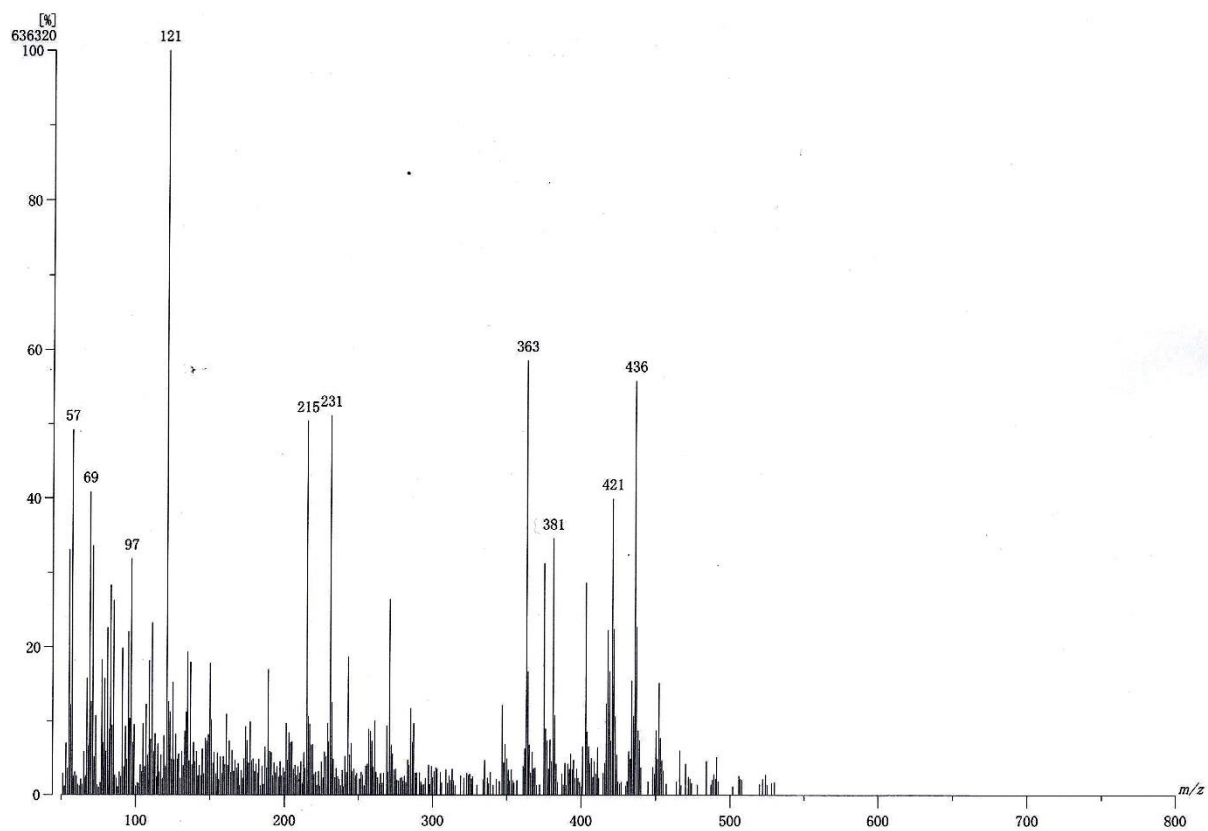

Instrument : MStation  
 Sample : -  
 Note : -  
 Inlet : Direct Ion Mode : EI+  
 RT : 1.14 min Scan# : 35  
 Elements : C 100/1, H 100/1, O 10/1  
 Mass Tolerance : 1000ppm, 3mmu if m/z > 3  
 Unsaturation (U.S.) : -0.5 - 20.0

| Observed m/z | Int%  | Err[ppm / mmu] | U.S. Composition |
|--------------|-------|----------------|------------------|
| 1 436.1882   | 77.13 | -0.9 / -0.4    | 13.0 C26 H28 O6  |

**Figure 28.** EIMS and HREIMS data of compound **14**

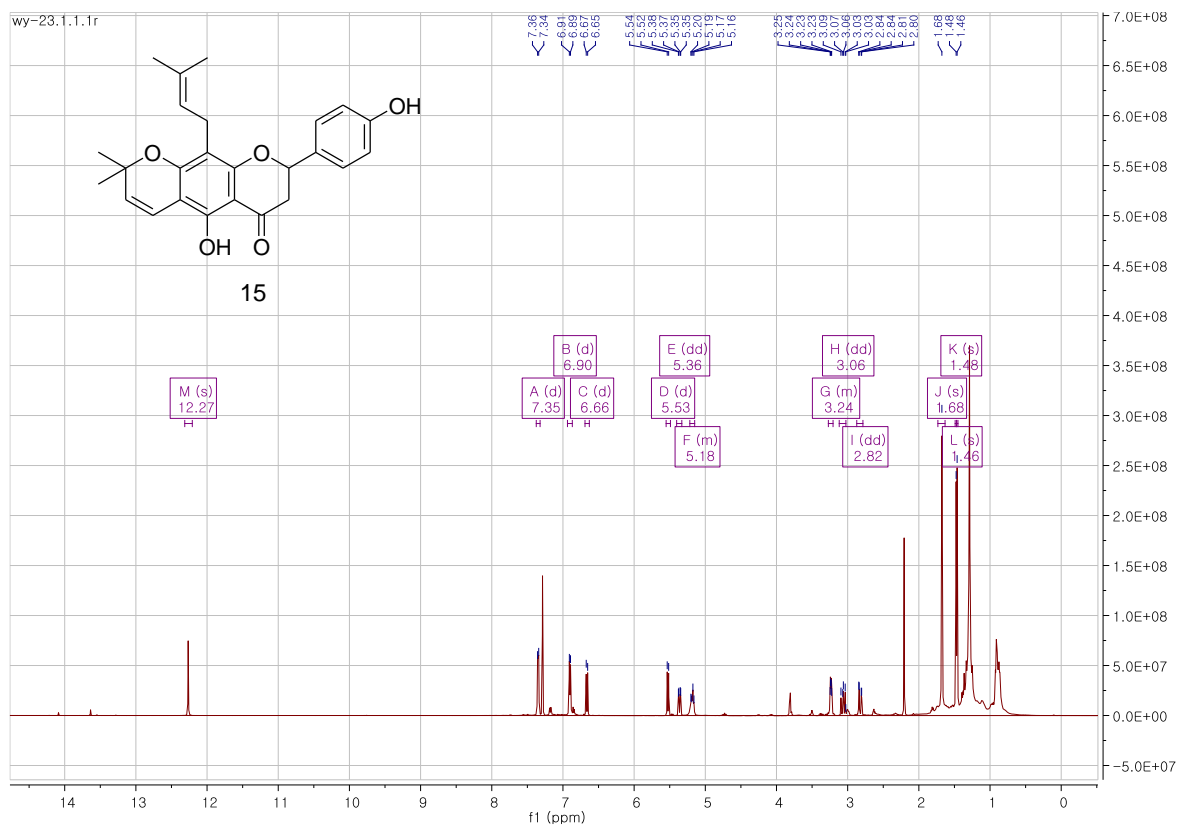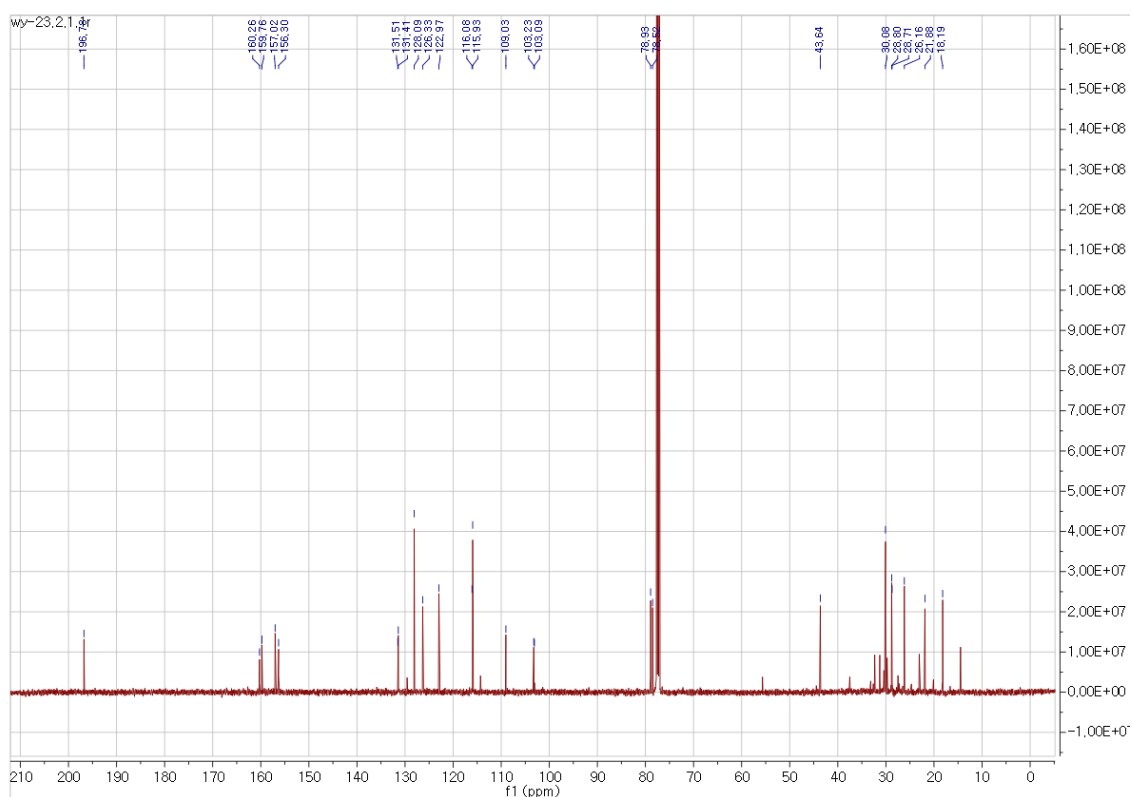

**Figure 29.**  $^1\text{H-NMR}$  (500 MHz) and  $^{13}\text{C-NMR}$  (125 MHz) spectrums of compound **15** ( $\text{CDCl}_3$ )

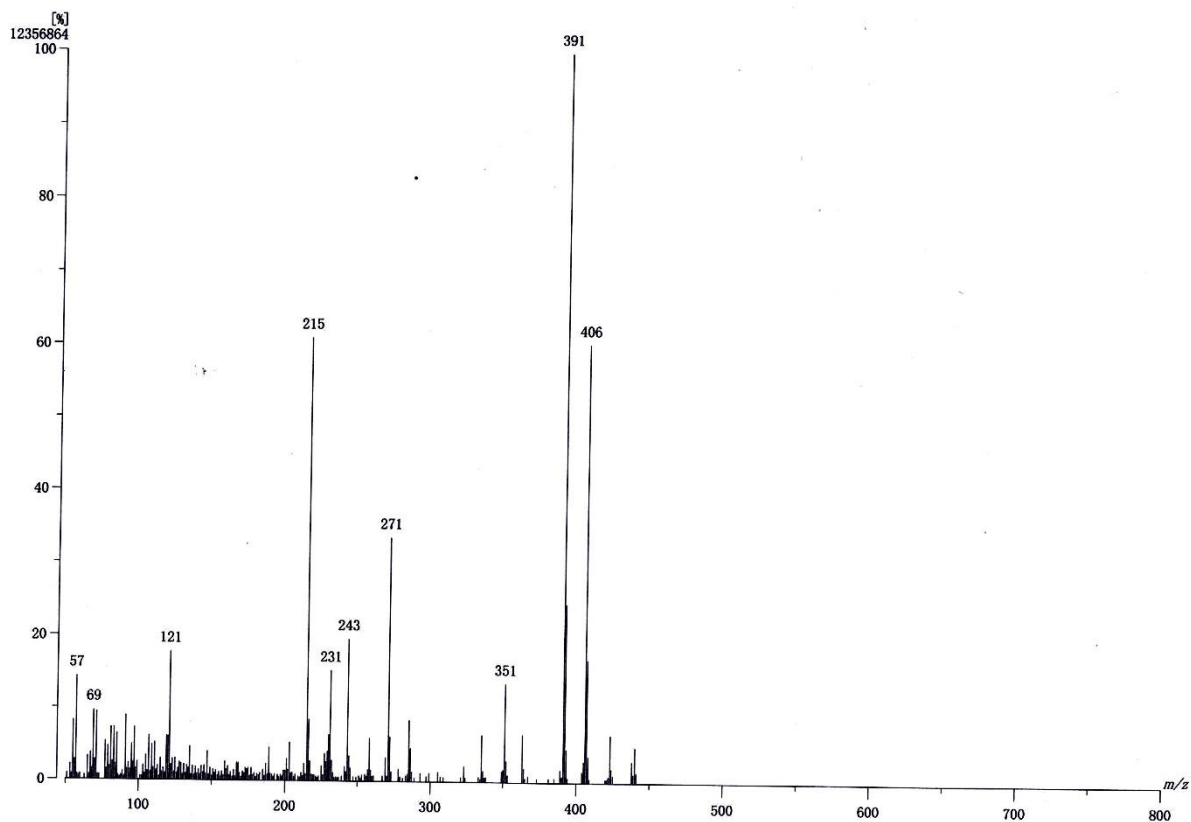

Instrument : MStation

Sample : -

Note : -

Inlet : Direct Ion Mode : EI+

RT : 1.30 min Scan# : 40

Elements : C 100/1, H 100/1, O 10/1

Mass Tolerance : 1000ppm, 3mmu if m/z > 3

Unsaturation (U.S.) : -0.5 - 20.0

| Observed m/z | Int%  | Err [ppm / mmu] | U.S. Composition |
|--------------|-------|-----------------|------------------|
| 1 406.1778   | 41.79 | -0.6 / -0.2     | 13.0 C25 H26 O5  |

**Figure 30.** EIMS and HREIMS data of compound **15**

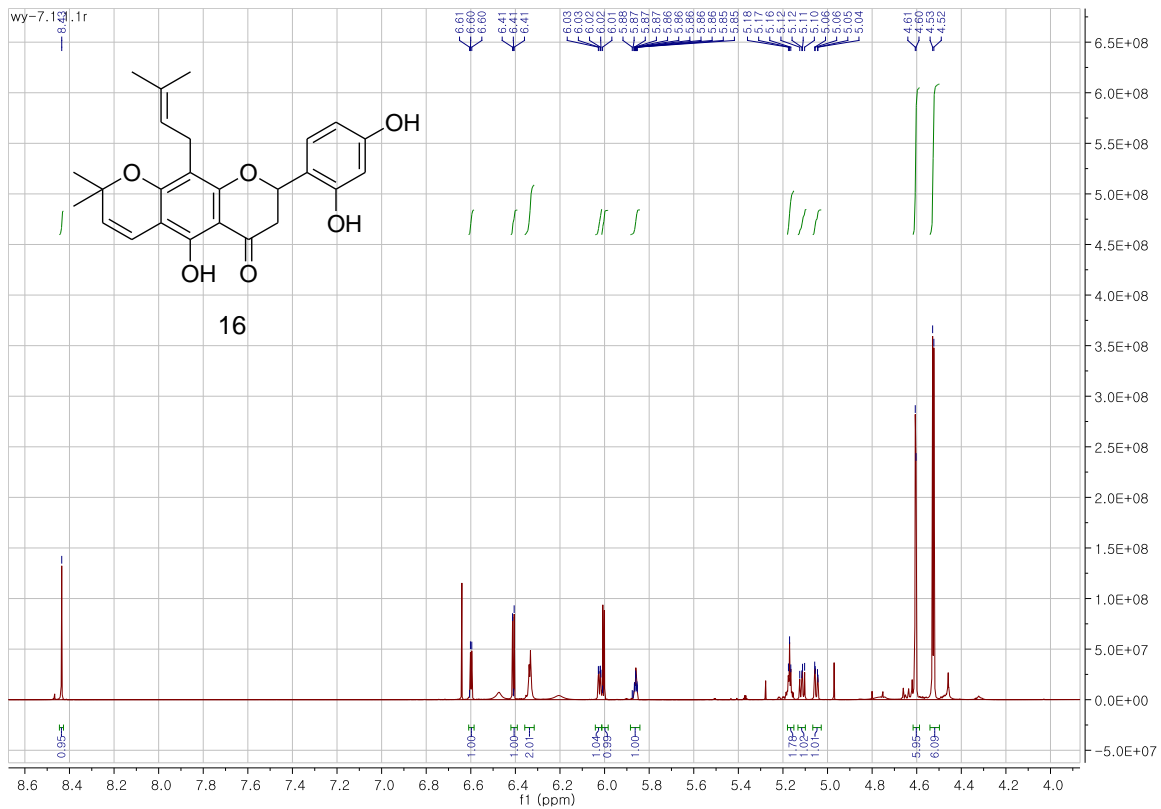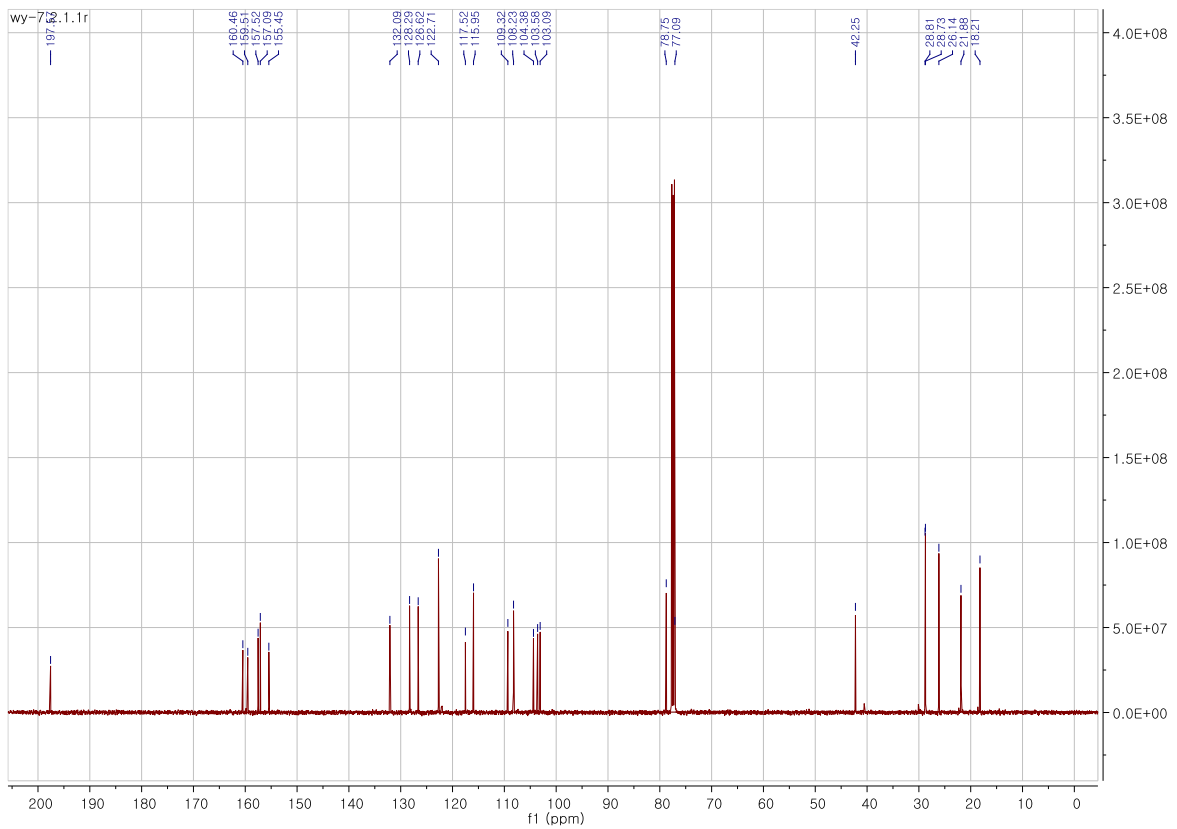

**Figure 31.** <sup>1</sup>H-NMR (500 MHz) and <sup>13</sup>C-NMR (125 MHz) spectrums of compound **16** (CDCl<sub>3</sub>)

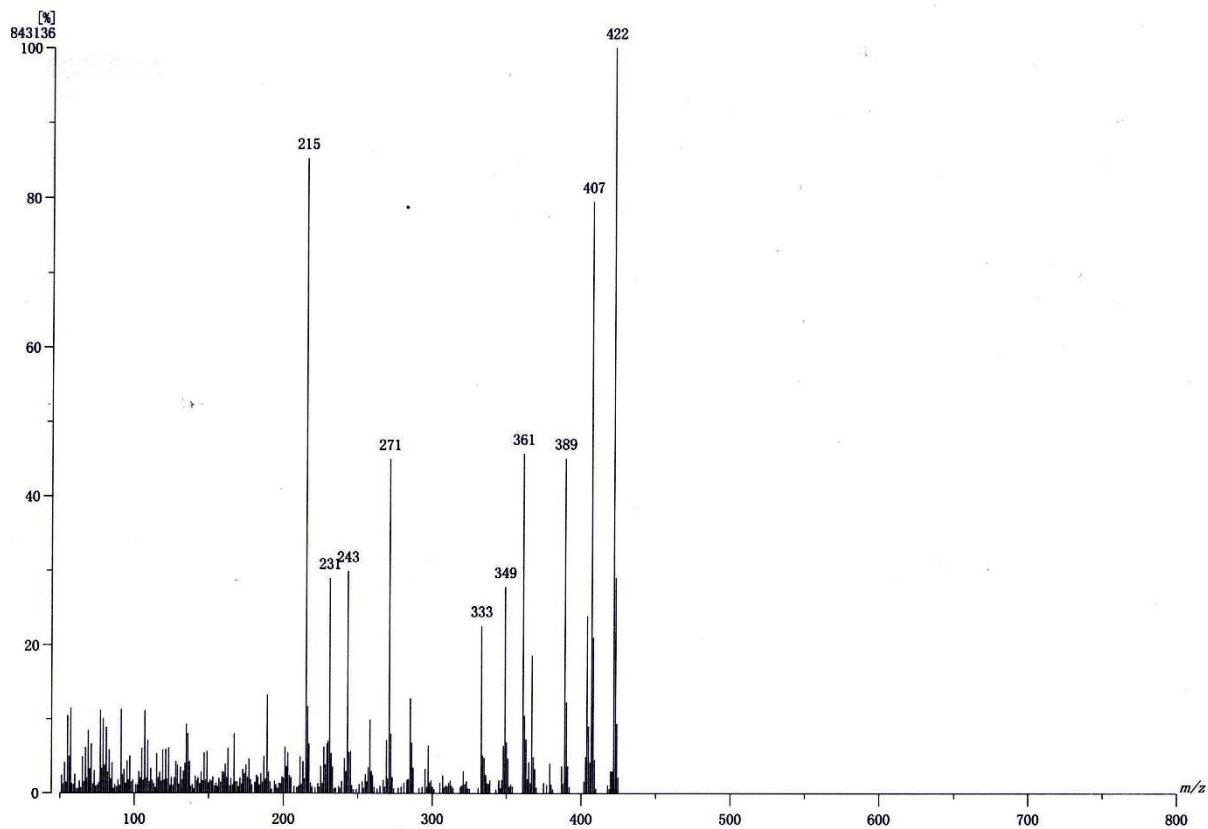

Instrument : MStation

Sample : -

Note : -

Inlet : Direct Ion Mode : EI+

RT : 1.67 min Scan# : 51

Elements : C 100/1, H 100/1, O 10/1

Mass Tolerance : 1000ppm, 3mmu if m/z > 3

Unsaturation (U.S.) : -0.5 - 20.0

|   | Observed m/z | Int%   | Err [ppm / mmu] | U.S. Composition |
|---|--------------|--------|-----------------|------------------|
| 1 | 422.1727     | 100.00 | -0.6 / -0.2     | 13.0 C25 H26 O6  |

Figure 32. EIMS and HREIMS data of compound 16

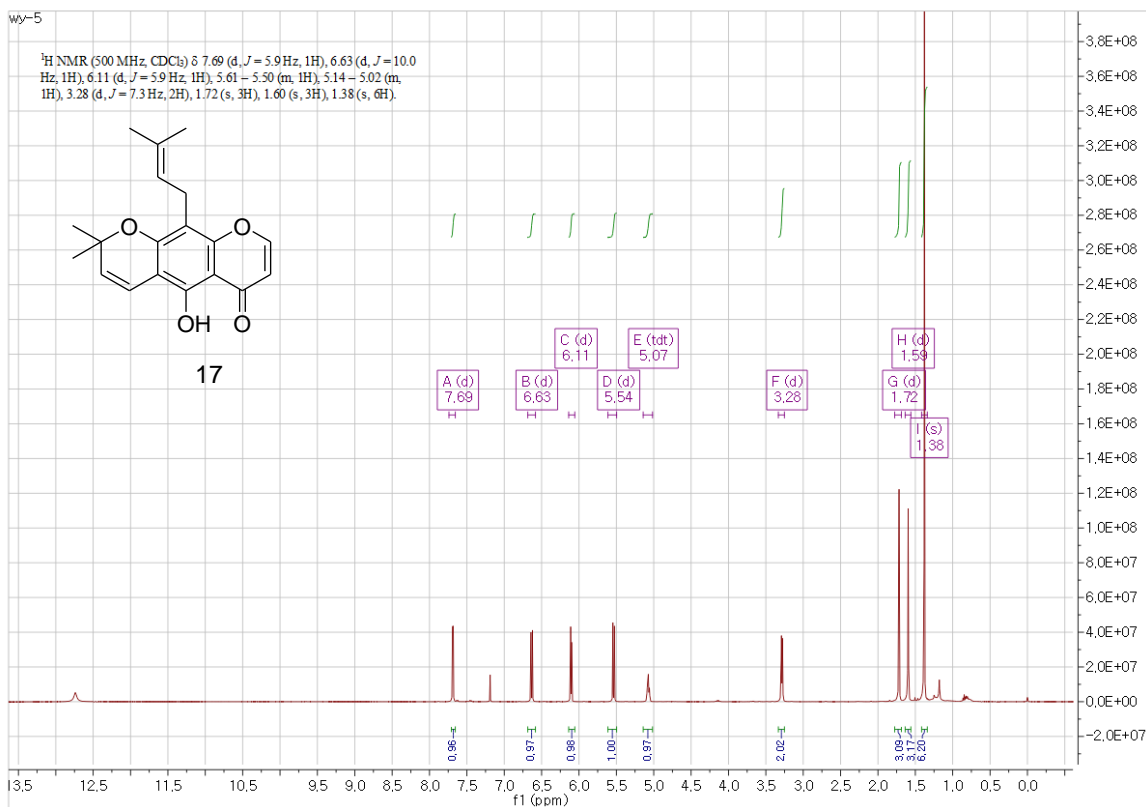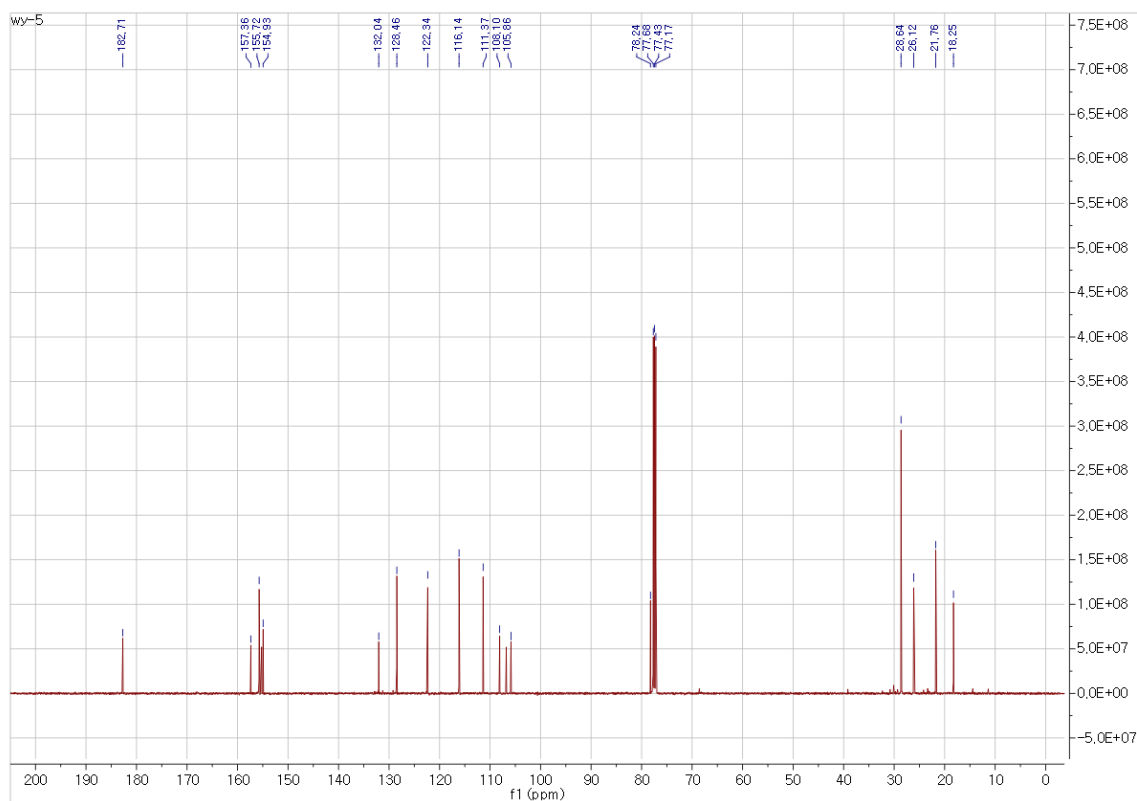

**Figure 33.** <sup>1</sup>H-NMR (500 MHz) and <sup>13</sup>C-NMR (125 MHz) spectrums of compound **17** (CDCl<sub>3</sub>)



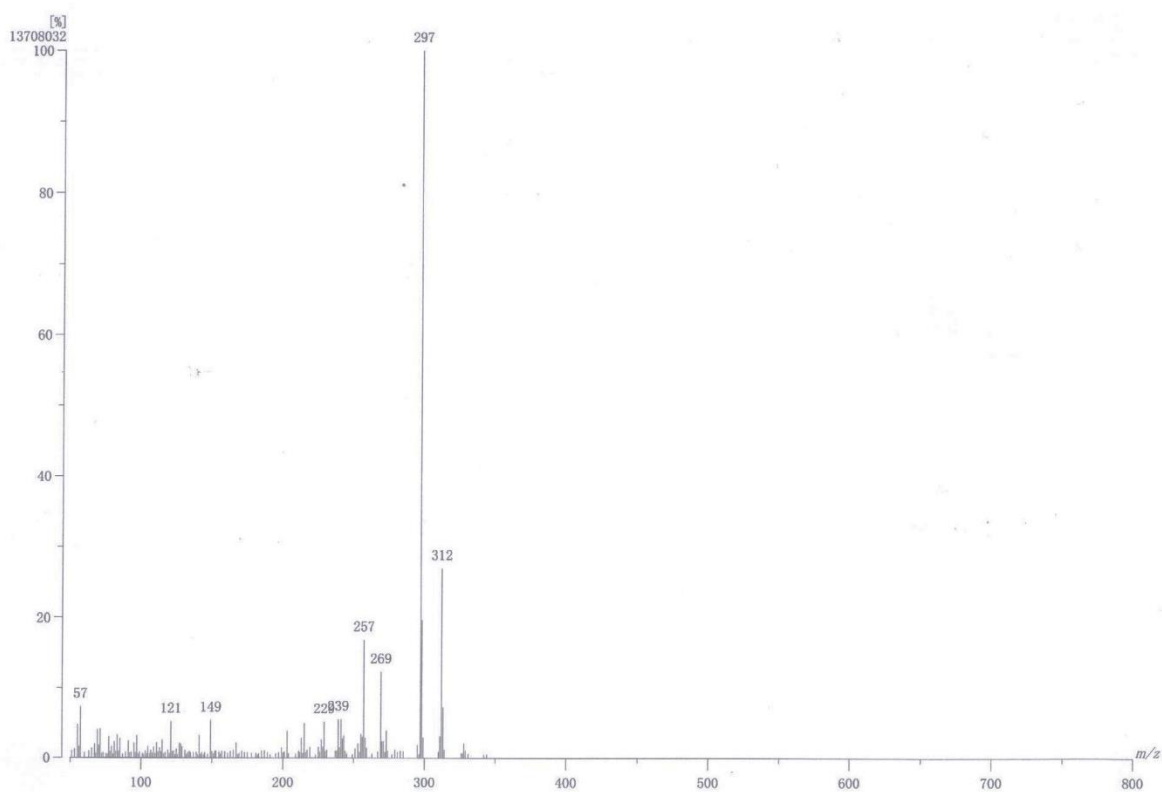

Instrument : MStation

Sample : -

Note : -

Inlet : Direct Ion Mode : EI+

RT : 0.27 min Scan# : 9

Elements : C 100/1, H 100/1, O 10/1

Mass Tolerance : 1000ppm, 3mmu if m/z > 3

Unsaturation (U.S.) : -0.5 - 20.0

| Observed m/z | Int%   | Err [ppm / mmu] | U.S. Composition |
|--------------|--------|-----------------|------------------|
| 1 312.1361   | 100.00 | -0.2 / -0.1     | 10.0 C19 H20 O4  |

Figure 34. EIMS and HREIMS data of compound 17

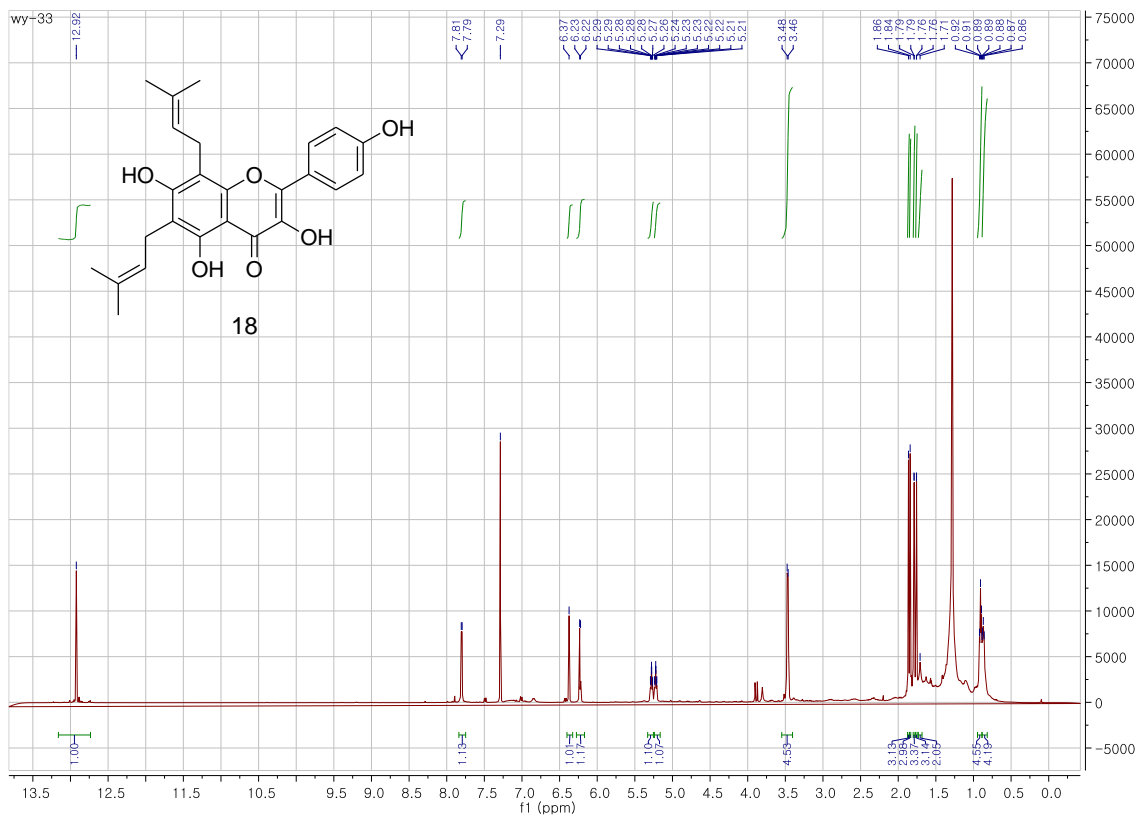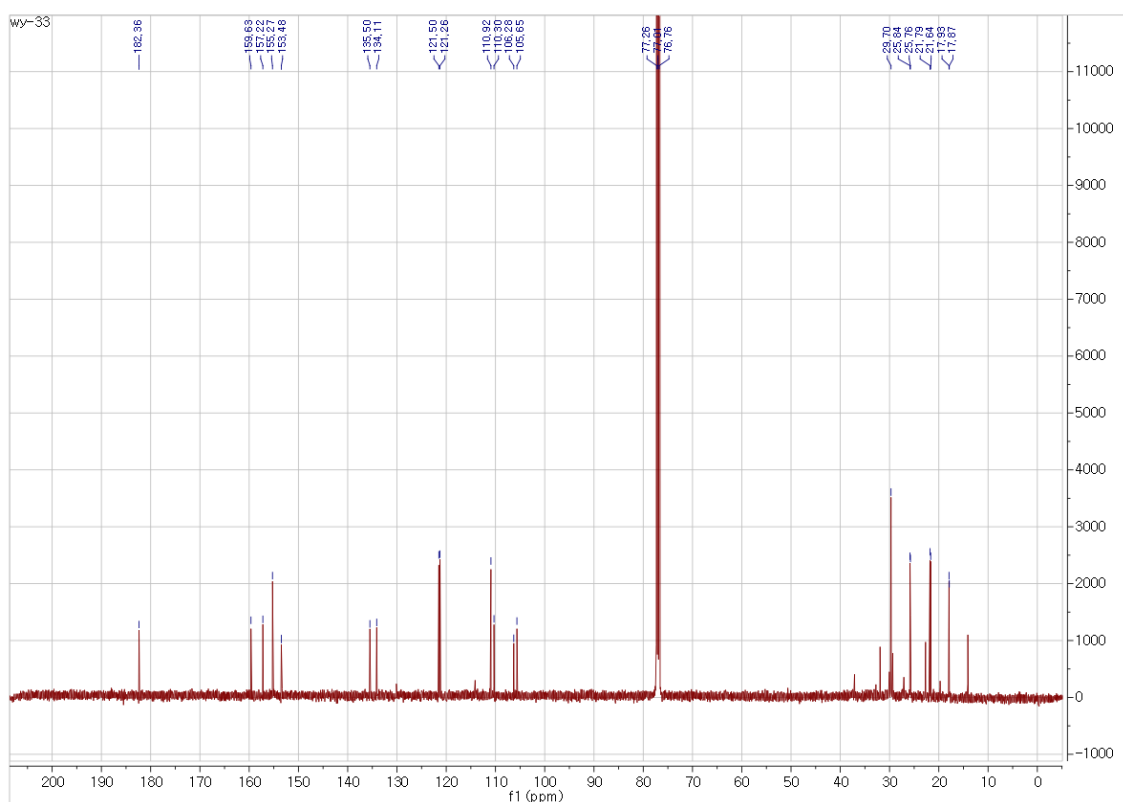

**Figure 35.** <sup>1</sup>H-NMR (500 MHz) and <sup>13</sup>C-NMR (125 MHz) spectra of compound **18** (CDCl<sub>3</sub>)



Sample: -  
 Note: -  
 Inlet: Direct  
 RT: 2.65 min  
 Elements: C 100/1, H 100/1, O 10/1  
 Mass Tolerance: 3mmu  
 Unsaturation (U.S.): 0.0 - 20.0  
 Ion Mode: EI+  
 Scan#: 54

| Observed m/z | Int%  | Err [ppm / mmu] | U.S. Composition   |
|--------------|-------|-----------------|--------------------|
| 422.1727     | 100.0 | -0.6 / -0.3     | 13.0 C 25 H 26 O 6 |

**Figure 36.** EIMS and HREIMS data of compound **18**

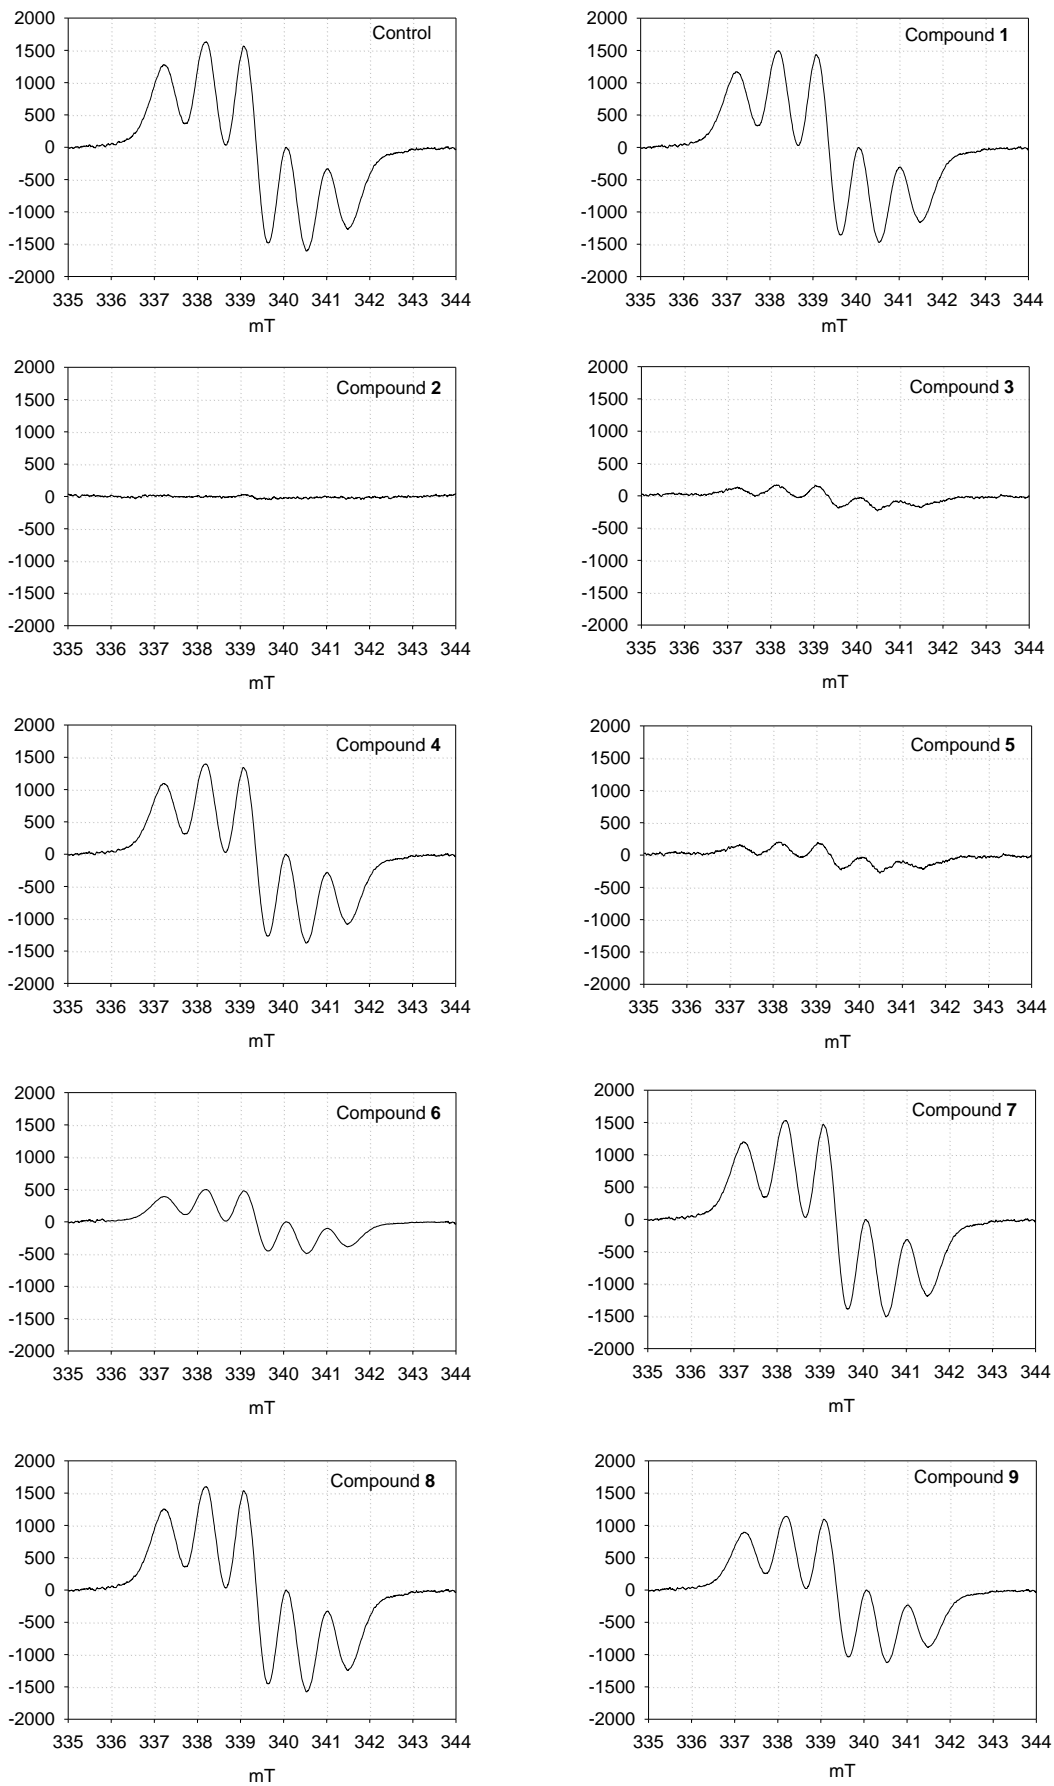

**Figure 37.** ESR spectra of DPPH radical scavenging effect of compounds 1-9 (7.0 mg/ml)

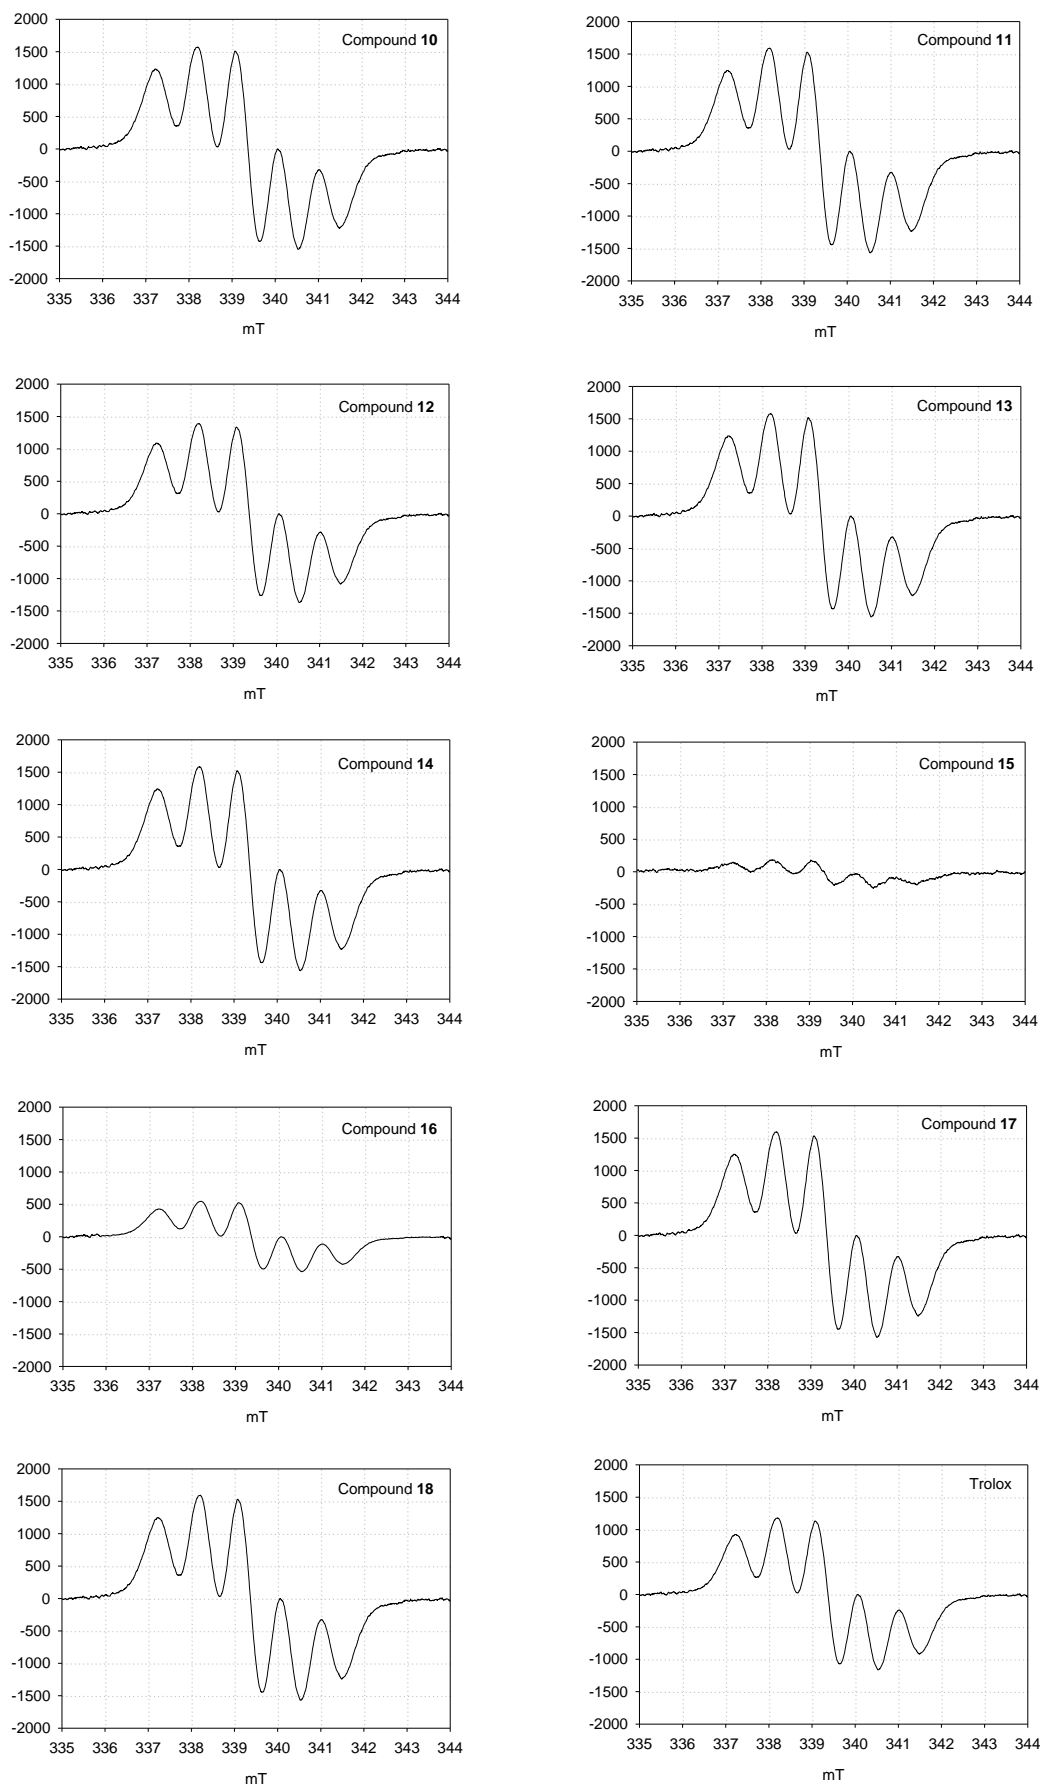

**Figure 38.** ESR spectra of DPPH radical scavenging effect of compounds 10-18 (7.0 mg/ml)

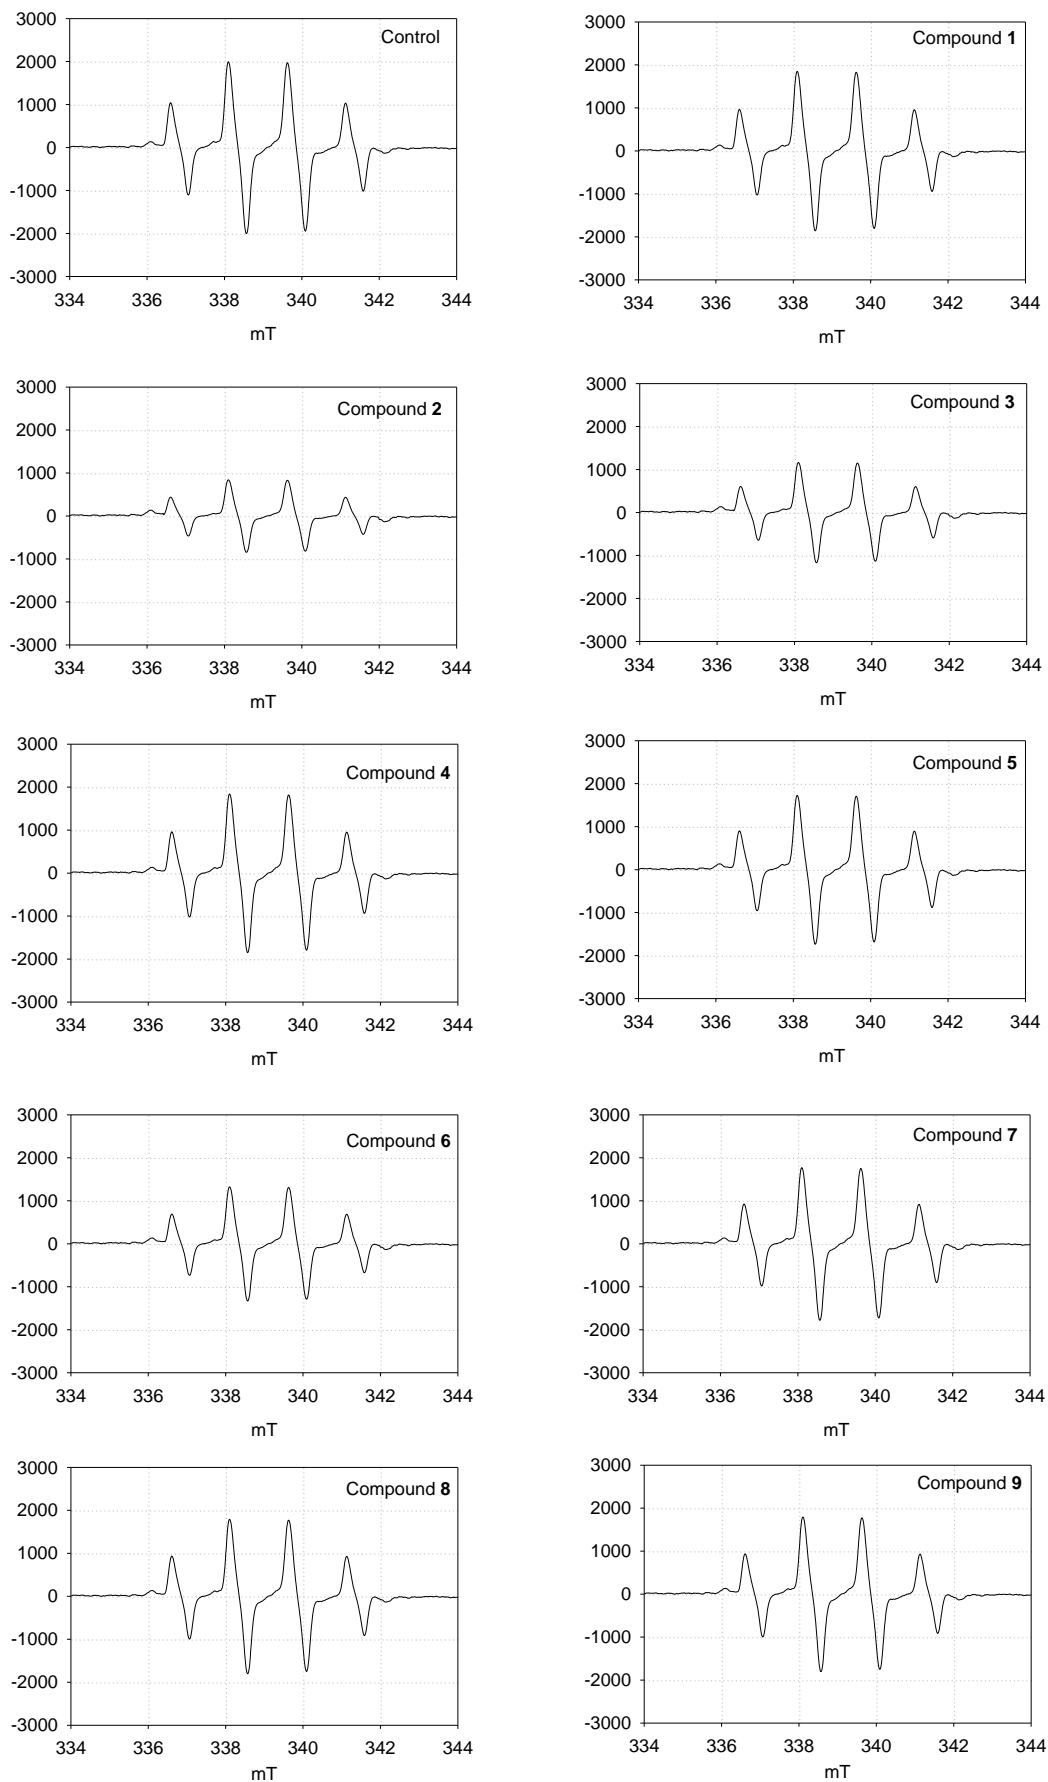

**Figure 39.** ESR spectra of hydroxyl radical scavenging effect of compounds 1-9 (7.5 mg/ml)

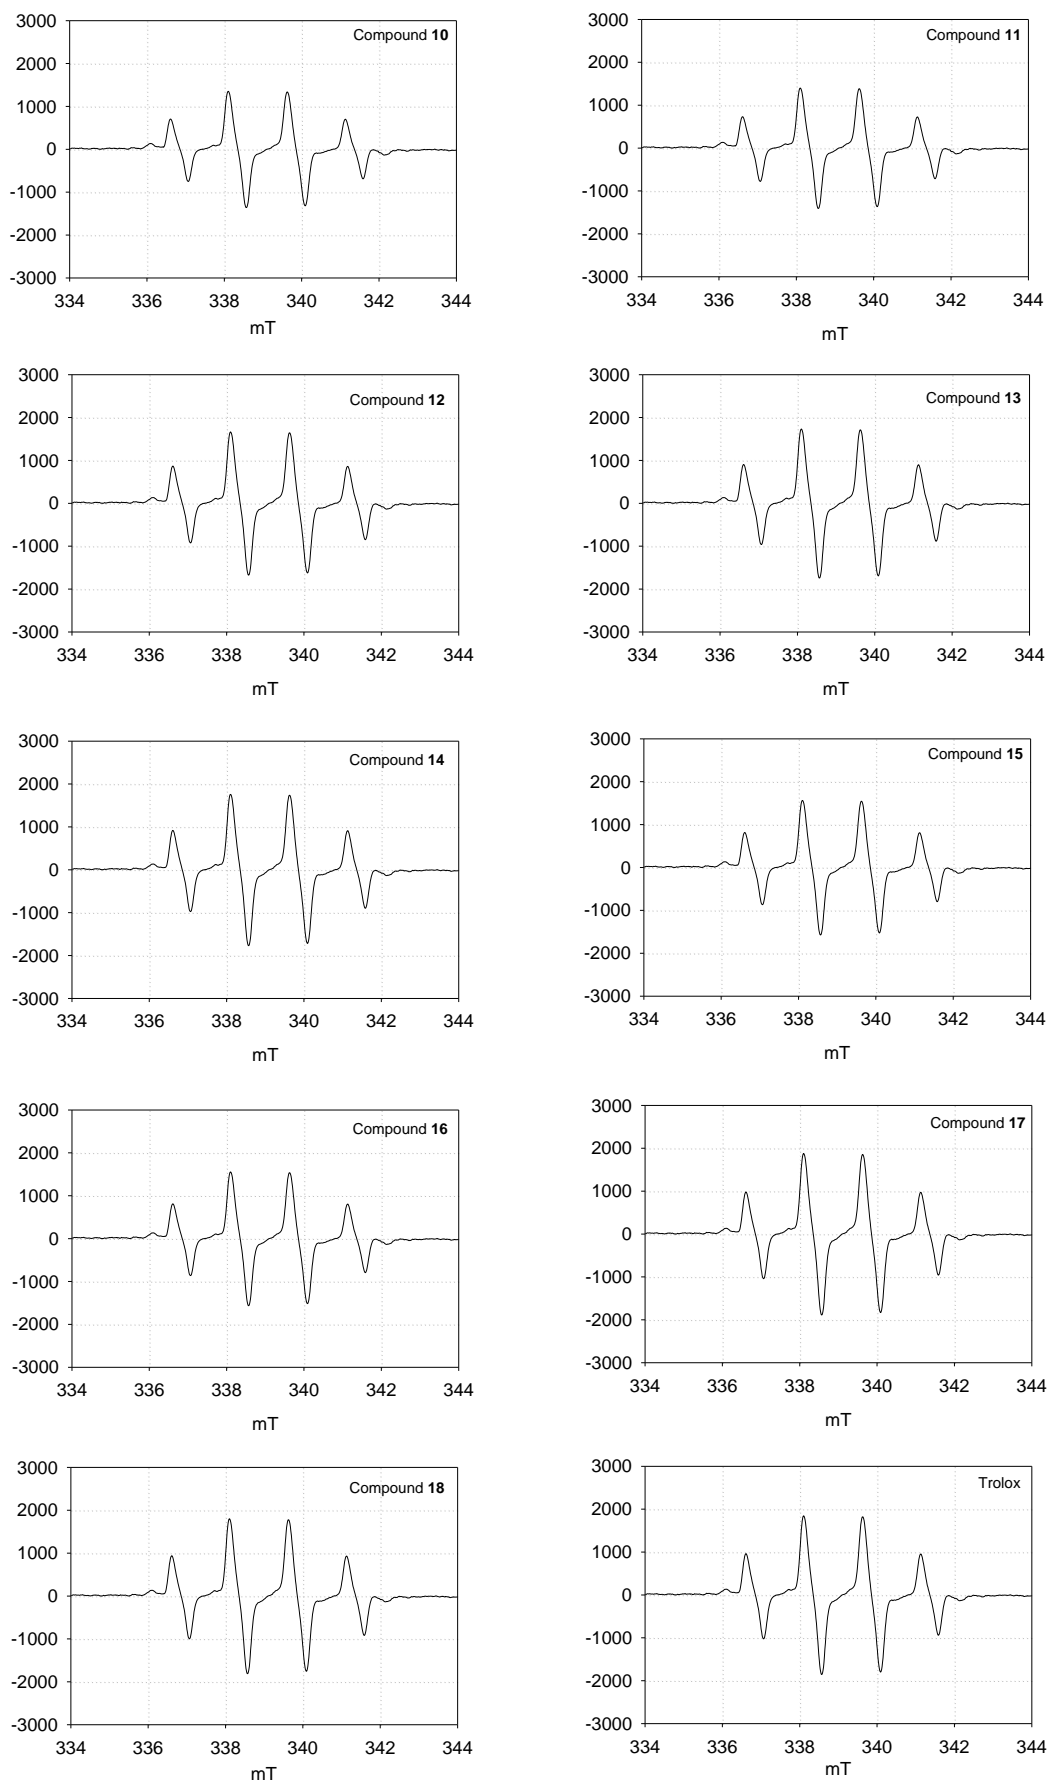

**Figure 40.** ESR spectra of hydroxyl radical scavenging effect of compounds 10-18 (7.5 mg/ml)

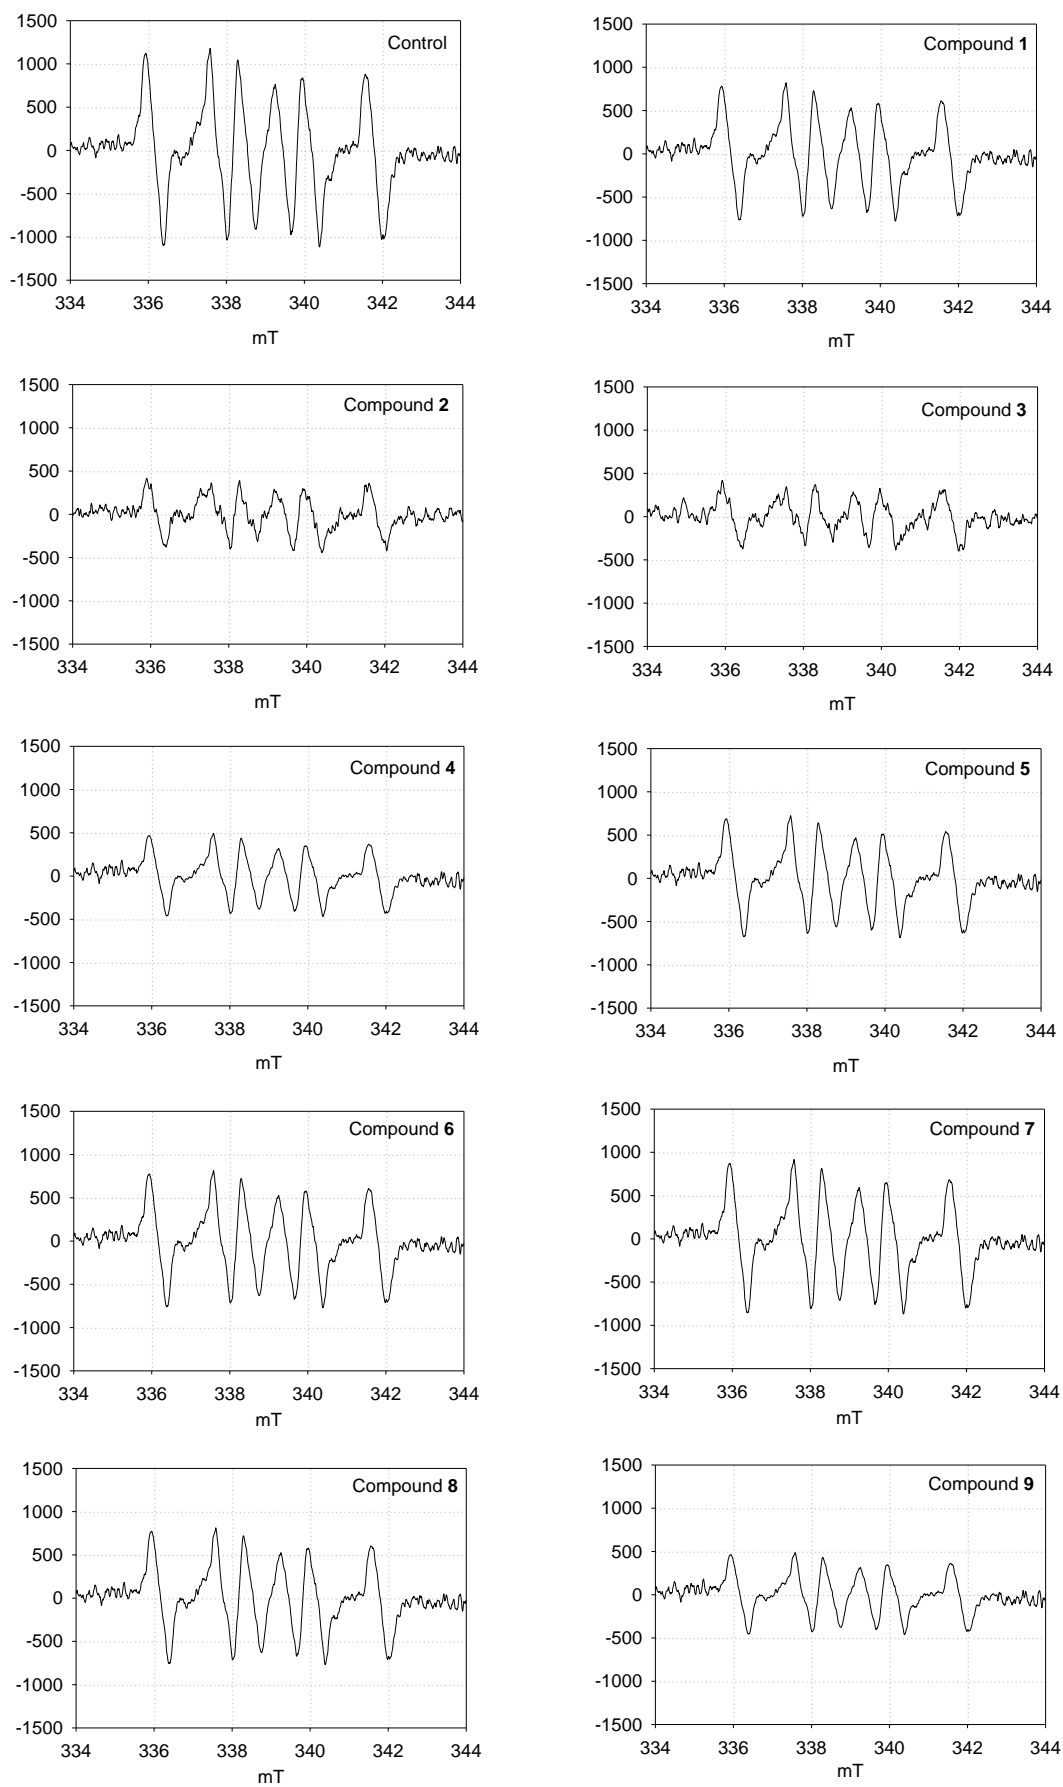

**Figure 41.** ESR spectra of superoxide radical scavenging effect of compounds 1-9 (25 mg/ml)



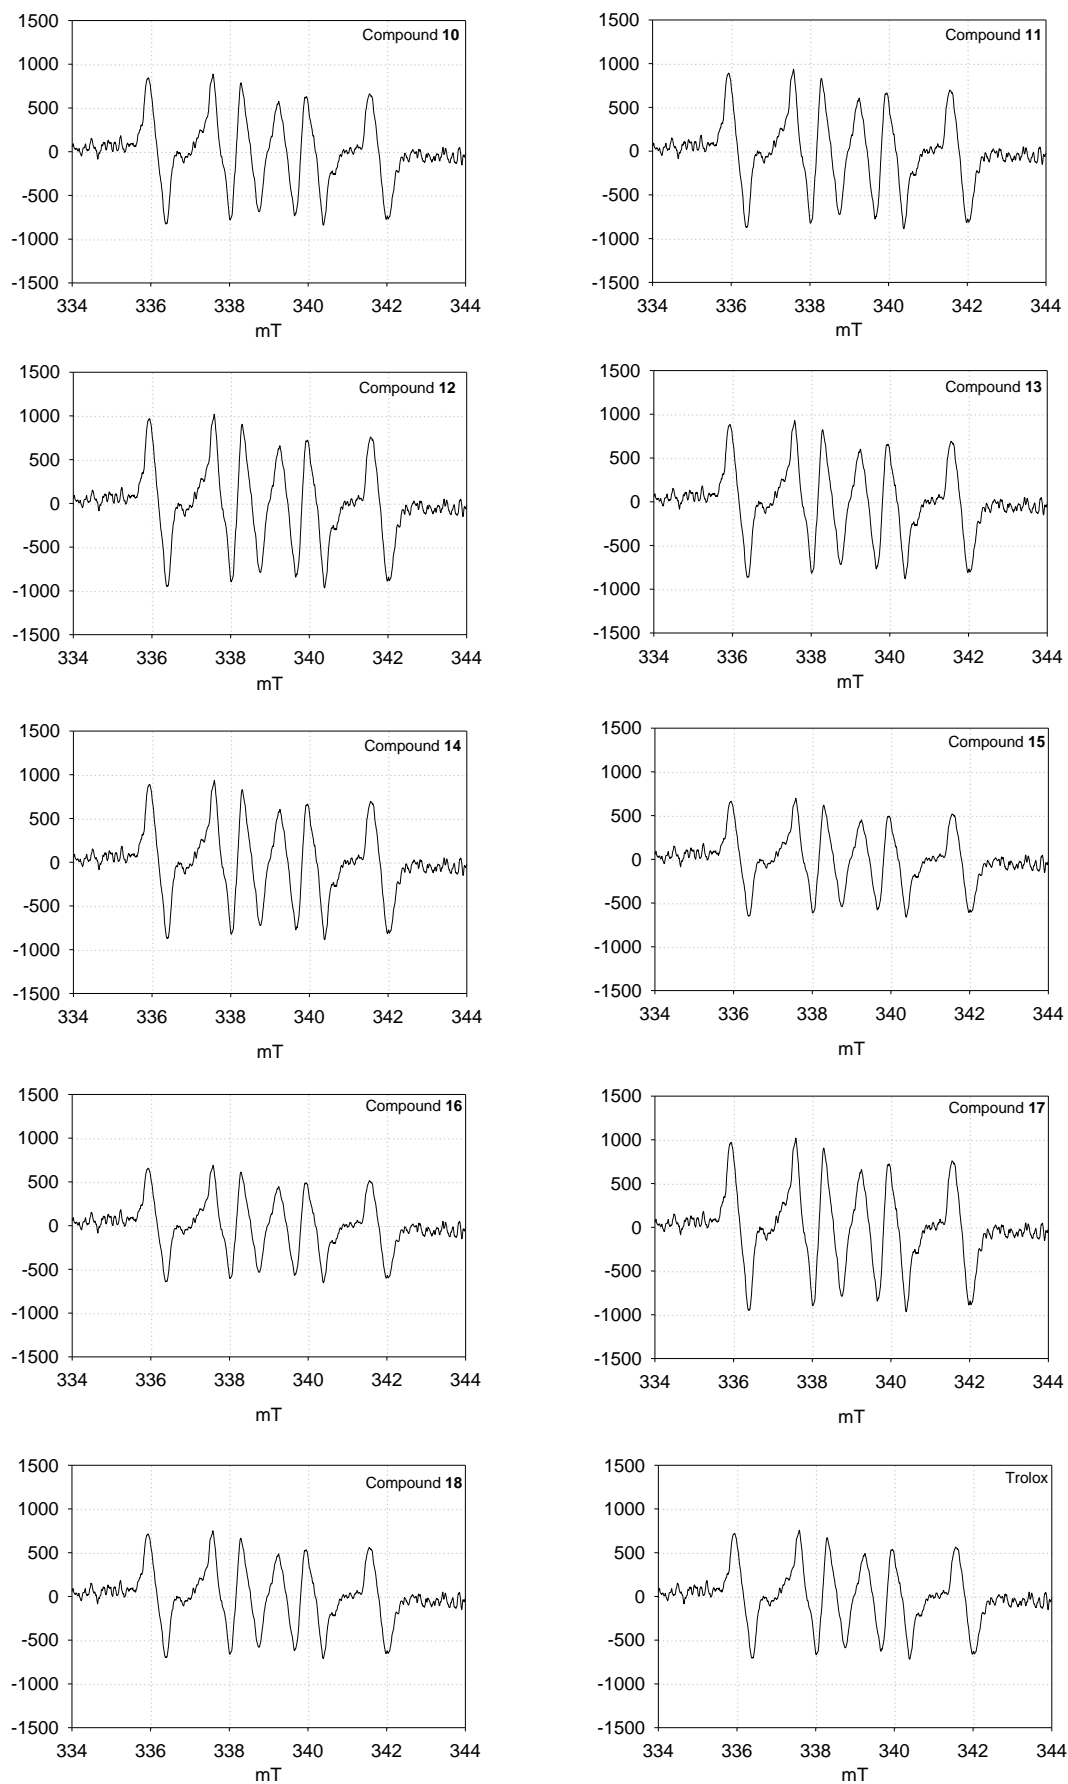

**Figure 42.** ESR spectra of superoxide radical scavenging effect of compounds 10-18 (25 mg/ml)

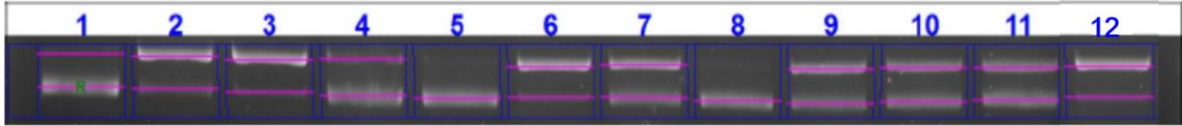

**Lane And Band Analysis**

**Lane 1**

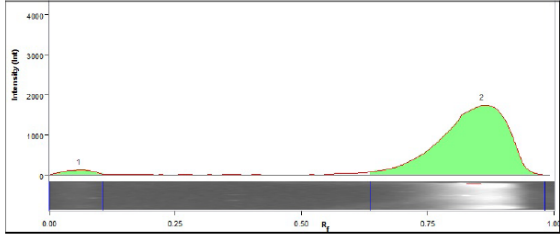

| Band No. | Band Label | Mol. Wt. (KDa) | Relative Front | Volume (Int) | Abs. Quant. | Rel. Quant. | Band % | Lane % |
|----------|------------|----------------|----------------|--------------|-------------|-------------|--------|--------|
| 1        |            | N/A            | 0.067          | 77,343       | N/A         | 0.03        | 3.0    | 3.0    |
| 2        |            | N/A            | 0.865          | 2,472,192    | N/A         | 1.00        | 97.0   | 94.6   |

**Lane 2**

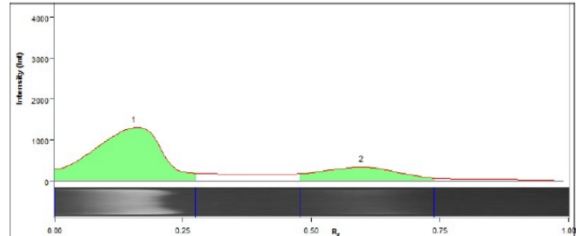

| Band No. | Band Label | Mol. Wt. (KDa) | Relative Front | Volume (Int) | Abs. Quant. | Rel. Quant. | Band % | Lane % |
|----------|------------|----------------|----------------|--------------|-------------|-------------|--------|--------|
| 1        |            | N/A            | 0.167          | 1,767,252    | N/A         | 1.00        | 77.1   | 67.8   |
| 2        |            | N/A            | 0.607          | 399,000      | N/A         | 0.30        | 22.9   | 20.1   |

**Lane 3**

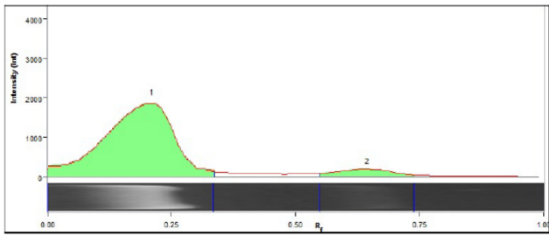

| Band No. | Band Label | Mol. Wt. (KDa) | Relative Front | Volume (Int) | Abs. Quant. | Rel. Quant. | Band % | Lane % |
|----------|------------|----------------|----------------|--------------|-------------|-------------|--------|--------|
| 1        |            | N/A            | 0.214          | 2,155,794    | N/A         | 1.02        | 89.3   | 82.4   |
| 2        |            | N/A            | 0.655          | 215,812      | N/A         | 0.12        | 10.7   | 9.9    |

**Lane 4**

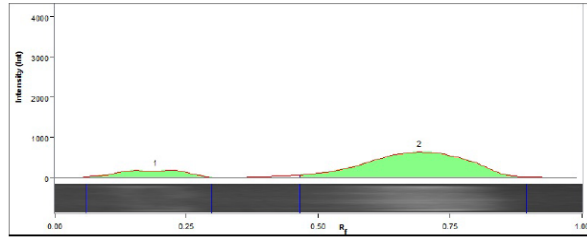

| Band No. | Band Label | Mol. Wt. (KDa) | Relative Front | Volume (Int) | Abs. Quant. | Rel. Quant. | Band % | Lane % |
|----------|------------|----------------|----------------|--------------|-------------|-------------|--------|--------|
| 1        |            | N/A            | 0.202          | 226,134      | N/A         | 0.13        | 15.3   | 15.0   |
| 2        |            | N/A            | 0.702          | 1,251,642    | N/A         | 0.71        | 84.7   | 83.1   |

**Lane 5**

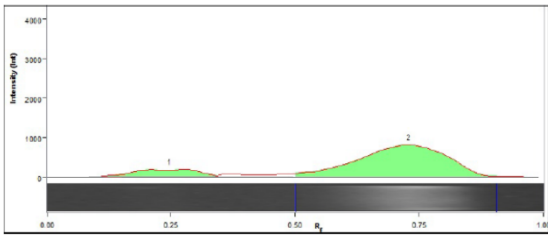

| Band No. | Band Label | Mol. Wt. (KDa) | Relative Front | Volume (Int) | Abs. Quant. | Rel. Quant. | Band % | Lane % |
|----------|------------|----------------|----------------|--------------|-------------|-------------|--------|--------|
| 1        |            | N/A            | 0.202          | 284,152      | N/A         | 0.13        | 10.4   | 7.2    |
| 2        |            | N/A            | 0.738          | 1,471,044    | N/A         | 0.83        | 87.5   | 88.2   |

**Lane 6**

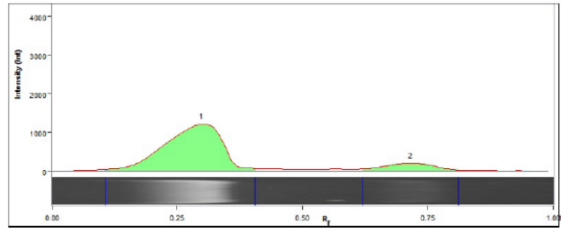

| Band No. | Band Label | Mol. Wt. (KDa) | Relative Front | Volume (Int) | Abs. Quant. | Rel. Quant. | Band % | Lane % |
|----------|------------|----------------|----------------|--------------|-------------|-------------|--------|--------|
| 1        |            | N/A            | 0.310          | 1,998,383    | N/A         | 0.79        | 87.5   | 82.5   |
| 2        |            | N/A            | 0.726          | 198,798      | N/A         | 0.11        | 12.5   | 11.8   |

Lane 7

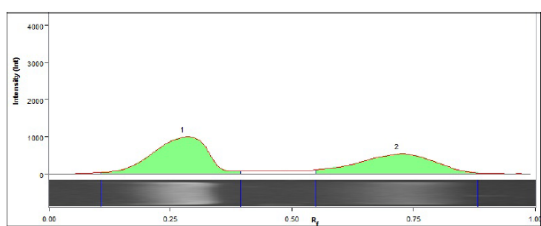

| Band No. | Band Label | Mol. Wt. (kDa) | Relative Front | Volume (Int) | Abs. Quant. | Rel. Quant. | Band % | Lane % |
|----------|------------|----------------|----------------|--------------|-------------|-------------|--------|--------|
| 1        |            | N/A            | 0.286          | 1,133,424    | N/A         | 0.64        | 56.9   | 53.9   |
| 2        |            | N/A            | 0.726          | 858,738      | N/A         | 0.49        | 43.1   | 40.8   |

Lane 8

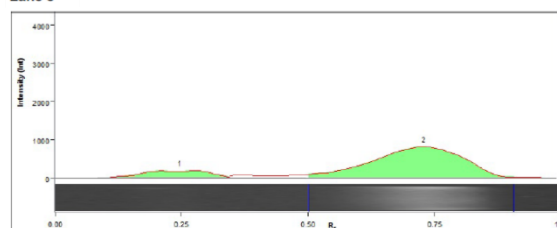

| Band No. | Band Label | Mol. Wt. (kDa) | Relative Front | Volume (Int) | Abs. Quant. | Rel. Quant. | Band % | Lane % |
|----------|------------|----------------|----------------|--------------|-------------|-------------|--------|--------|
| 1        |            | N/A            | 0.202          | 383,045      | N/A         | 0.13        | 8.8    | 11.5   |
| 2        |            | N/A            | 0.738          | 1,251,980    | N/A         | 0.83        | 92.3   | 88.2   |

Lane 9

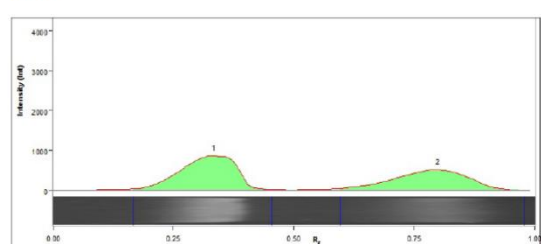

| Band No. | Band Label | Mol. Wt. (kDa) | Relative Front | Volume (Int) | Abs. Quant. | Rel. Quant. | Band % | Lane % |
|----------|------------|----------------|----------------|--------------|-------------|-------------|--------|--------|
| 1        |            | N/A            | 0.345          | 1,504,484    | N/A         | 0.58        | 56.3   | 55.3   |
| 2        |            | N/A            | 0.810          | 793,560      | N/A         | 0.45        | 43.7   | 43.0   |

Lane 10

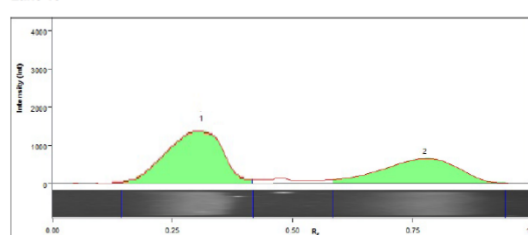

| Band No. | Band Label | Mol. Wt. (kDa) | Relative Front | Volume (Int) | Abs. Quant. | Rel. Quant. | Band % | Lane % |
|----------|------------|----------------|----------------|--------------|-------------|-------------|--------|--------|
| 1        |            | N/A            | 0.321          | 1,789,887    | N/A         | 0.60        | 53.8   | 50.2   |
| 2        |            | N/A            | 0.786          | 1,067,184    | N/A         | 0.52        | 46.2   | 43.2   |

Lane 11

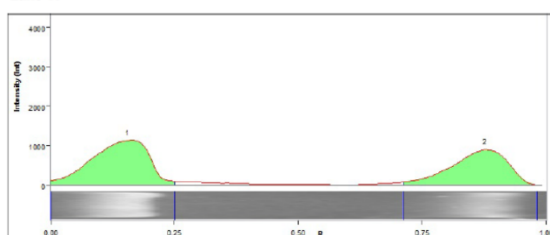

| Band No. | Band Label | Mol. Wt. (kDa) | Relative Front | Volume (Int) | Abs. Quant. | Rel. Quant. | Band % | Lane % |
|----------|------------|----------------|----------------|--------------|-------------|-------------|--------|--------|
| 1        |            | N/A            | 0.163          | 1,800,574    | N/A         | 0.57        | 56.8   | 54.0   |
| 2        |            | N/A            | 0.885          | 1,115,133    | N/A         | 0.43        | 43.2   | 41.1   |

**Figure 43.** Results of electrophoresis by pBR322 plasmid DNA band intensity; Lane 1, pBR322 plasmid DNA; Lane 2, oxidative DNA; Lane 3, compound 1; Lane 4, compound 2; Lane 5, compound 3; Lane 6, compound 4; Lane 7, compound 5; Lane 8, compound 6; Lane 9, compound 7; Lane 10, compound 8; Lane 11, compound 9.

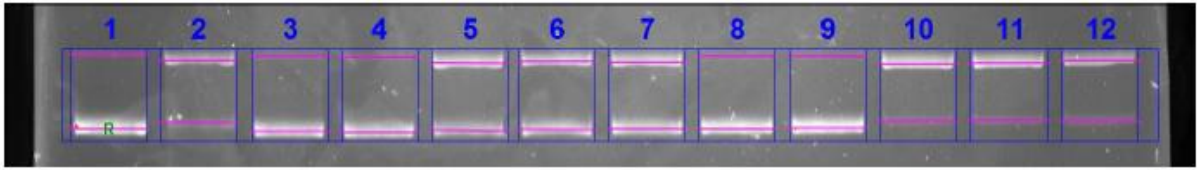

Lane 3

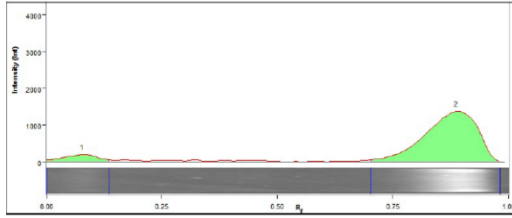

| Band No. | Band Label | Mol. Wt. (KDa) | Relative Front | Volume (Int) | Abs. Quant. | Rel. Quant. | Band % | Lane % |
|----------|------------|----------------|----------------|--------------|-------------|-------------|--------|--------|
| 1        |            | N/A            | 0.087          | 384,875      | N/A         | 0.06        | 8.6    | 8.0    |
| 2        |            | N/A            | 0.894          | 1,648,911    | N/A         | 0.67        | 91.4   | 85.1   |

Lane 4

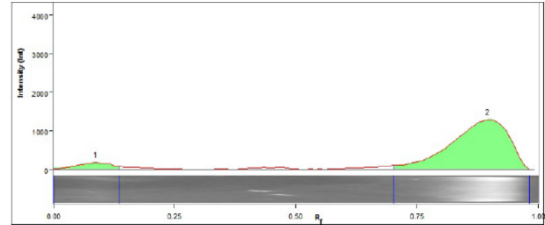

| Band No. | Band Label | Mol. Wt. (KDa) | Relative Front | Volume (Int) | Abs. Quant. | Rel. Quant. | Band % | Lane % |
|----------|------------|----------------|----------------|--------------|-------------|-------------|--------|--------|
| 1        |            | N/A            | 0.096          | 430,499      | N/A         | 0.05        | 7.6    | 7.1    |
| 2        |            | N/A            | 0.904          | 1,619,940    | N/A         | 0.66        | 92.4   | 85.9   |

Lane 5

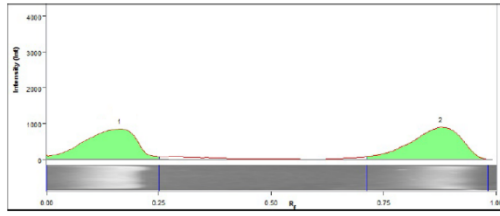

| Band No. | Band Label | Mol. Wt. (KDa) | Relative Front | Volume (Int) | Abs. Quant. | Rel. Quant. | Band % | Lane % |
|----------|------------|----------------|----------------|--------------|-------------|-------------|--------|--------|
| 1        |            | N/A            | 0.163          | 914,188      | N/A         | 0.43        | 43.2   | 41.1   |
| 2        |            | N/A            | 0.885          | 1,074,885    | N/A         | 0.57        | 56.8   | 54.0   |

Lane 6

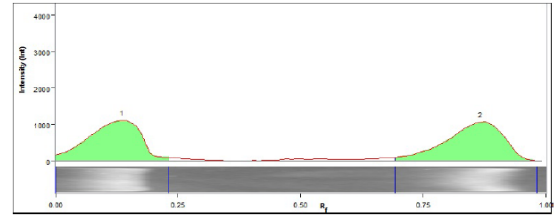

| Band No. | Band Label | Mol. Wt. (KDa) | Relative Front | Volume (Int) | Abs. Quant. | Rel. Quant. | Band % | Lane % |
|----------|------------|----------------|----------------|--------------|-------------|-------------|--------|--------|
| 1        |            | N/A            | 0.144          | 1,273,941    | N/A         | 0.52        | 49.2   | 46.6   |
| 2        |            | N/A            | 0.875          | 1,315,875    | N/A         | 0.53        | 50.8   | 48.1   |

Lane 7

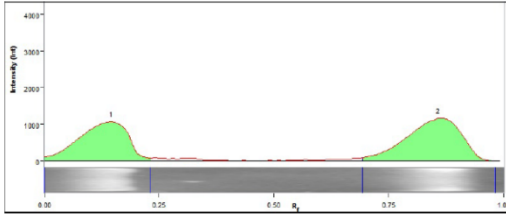

| Band No. | Band Label | Mol. Wt. (KDa) | Relative Front | Volume (Int) | Abs. Quant. | Rel. Quant. | Band % | Lane % |
|----------|------------|----------------|----------------|--------------|-------------|-------------|--------|--------|
| 1        |            | N/A            | 0.154          | 1,218,609    | N/A         | 0.49        | 45.5   | 43.4   |
| 2        |            | N/A            | 0.865          | 1,462,557    | N/A         | 0.59        | 54.5   | 52.0   |

Lane 8

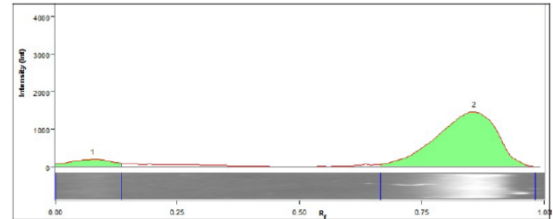

| Band No. | Band Label | Mol. Wt. (KDa) | Relative Front | Volume (Int) | Abs. Quant. | Rel. Quant. | Band % | Lane % |
|----------|------------|----------------|----------------|--------------|-------------|-------------|--------|--------|
| 1        |            | N/A            | 0.087          | 532,171      | N/A         | 0.07        | 8.5    | 8.0    |
| 2        |            | N/A            | 0.865          | 1,919,829    | N/A         | 0.78        | 91.5   | 85.7   |

Lane 9

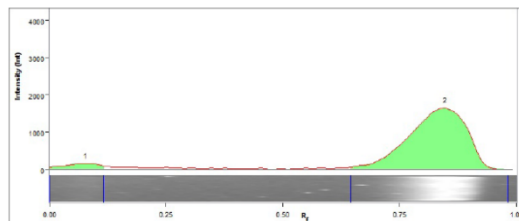

| Band No. | Band Label | Mol. Wt. (KDa) | Relative Front | Volume (Int) | Abs. Quant. | Rel. Quant. | Band % | Lane % |
|----------|------------|----------------|----------------|--------------|-------------|-------------|--------|--------|
| 1        |            | N/A            | 0.087          | 505,487      | N/A         | 0.05        | 5.6    | 5.3    |
| 2        |            | N/A            | 0.856          | 2,153,511    | N/A         | 0.87        | 94.4   | 89.0   |

Lane 10

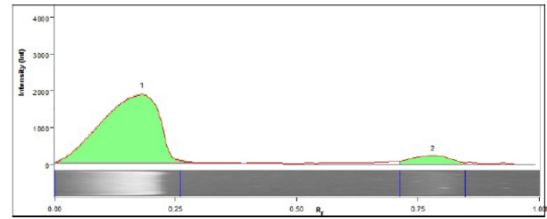

| Band No. | Band Label | Mol. Wt. (KDa) | Relative Front | Volume (Int) | Abs. Quant. | Rel. Quant. | Band % | Lane % |
|----------|------------|----------------|----------------|--------------|-------------|-------------|--------|--------|
| 1        |            | N/A            | 0.173          | 2,300,434    | N/A         | 0.61        | 88.1   | 82.1   |
| 2        |            | N/A            | 0.788          | 204,798      | N/A         | 0.08        | 11.9   | 11.1   |

Lane 11

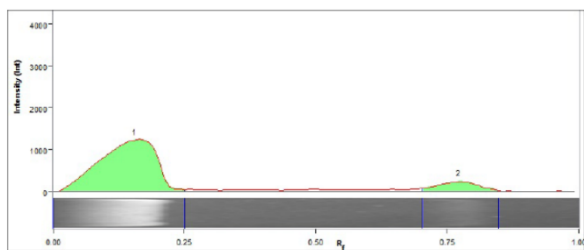

| Band No. | Band Label | Mol. Wt. (kDa) | Relative Front | Volume (Int) | Abs. Quant. | Rel. Quant. | Band % | Lane % |
|----------|------------|----------------|----------------|--------------|-------------|-------------|--------|--------|
| 1        |            | N/A            | 0.163          | 1,847,533    | N/A         | 0.57        | 88.1   | 80.5   |
| 2        |            | N/A            | 0.779          | 190,791      | N/A         | 0.08        | 11.9   | 10.8   |

Lane 12

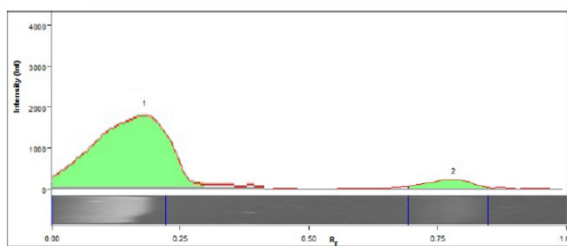

| Band No. | Band Label | Mol. Wt. (kDa) | Relative Front | Volume (Int) | Abs. Quant. | Rel. Quant. | Band % | Lane % |
|----------|------------|----------------|----------------|--------------|-------------|-------------|--------|--------|
| 1        |            | N/A            | 0.135          | 2,000,494    | N/A         | 0.43        | 83.4   | 78.0   |
| 2        |            | N/A            | 0.788          | 213,150      | N/A         | 0.09        | 16.6   | 15.6   |

**Figure 44.** Results of electrophoresis by pBR322 plasmid DNA band intensity; Lane 3, compound **10**; Lane 4, compound **11**; Lane 5, compound **12**; Lane 6, compound **13**; Lane 7, compound **14**; Lane 8, compound **15**; Lane 9, compound **16**; Lane 10, compound **17**; Lane 11, compound **18**; Lane 12, trolox.

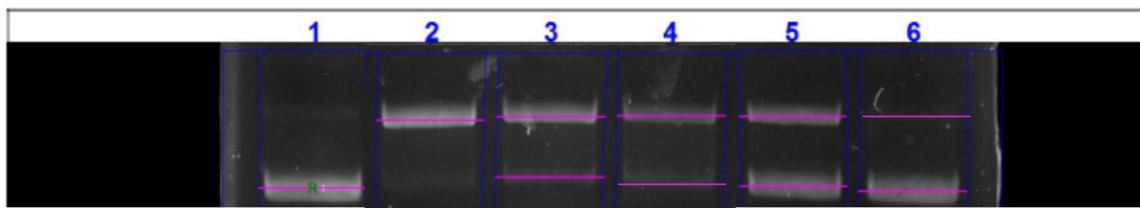

Lane 1

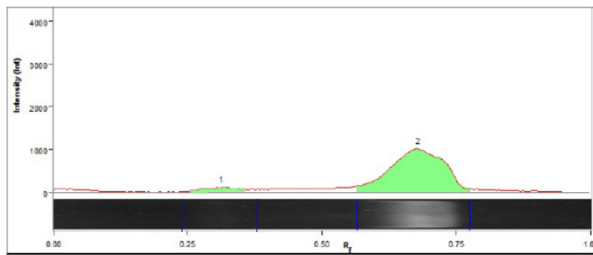

| Band No. | Band Label | Mol. Wt. (KDa) | Relative Front | Volume (Int) | Abs. Quant. | Rel. Quant. | Band % | Lane % |
|----------|------------|----------------|----------------|--------------|-------------|-------------|--------|--------|
| 1        |            | N/A            | 0.329          | 21,489       | N/A         | 0.06        | 2.64   | 1.2    |
| 2        |            | N/A            | 0.675          | 2,854,032    | N/A         | 0.87        | 89.9   | 92.2   |

Lane 2

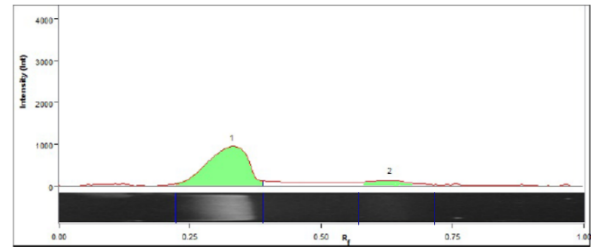

| Band No. | Band Label | Mol. Wt. (KDa) | Relative Front | Volume (Int) | Abs. Quant. | Rel. Quant. | Band % | Lane % |
|----------|------------|----------------|----------------|--------------|-------------|-------------|--------|--------|
| 1        |            | N/A            | 0.317          | 2,488,197    | N/A         | 0.49        | 83.3   | 70.0   |
| 2        |            | N/A            | 0.613          | 104,681      | N/A         | 0.08        | 14.1   | 11.8   |

Lane 3

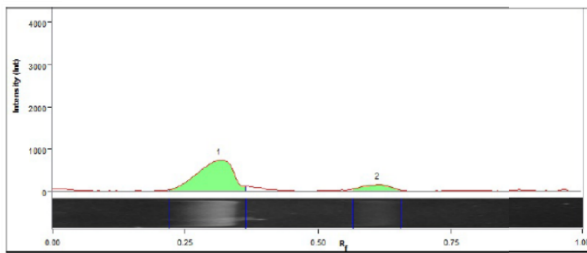

| Band No. | Band Label | Mol. Wt. (KDa) | Relative Front | Volume (Int) | Abs. Quant. | Rel. Quant. | Band % | Lane % |
|----------|------------|----------------|----------------|--------------|-------------|-------------|--------|--------|
| 1        |            | N/A            | 0.317          | 2,124,835    | N/A         | 0.49        | 83.3   | 70.0   |
| 2        |            | N/A            | 0.613          | 501,365      | N/A         | 0.08        | 14.1   | 11.8   |

Lane 4

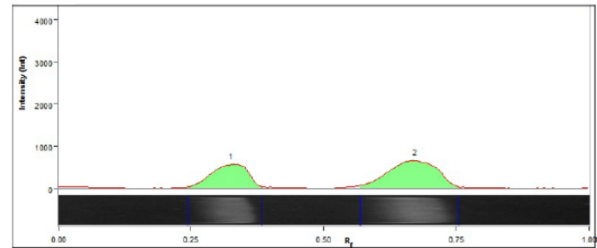

| Band No. | Band Label | Mol. Wt. (KDa) | Relative Front | Volume (Int) | Abs. Quant. | Rel. Quant. | Band % | Lane % |
|----------|------------|----------------|----------------|--------------|-------------|-------------|--------|--------|
| 1        |            | N/A            | 0.329          | 1,474,330    | N/A         | 0.39        | 39.4   | 36.4   |
| 2        |            | N/A            | 0.675          | 1,033,238    | N/A         | 0.60        | 60.6   | 56.1   |

Lane 5

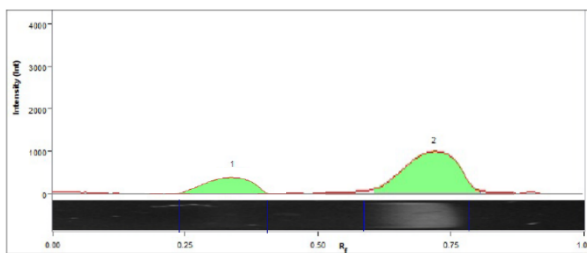

| Band No. | Band Label | Mol. Wt. (KDa) | Relative Front | Volume (Int) | Abs. Quant. | Rel. Quant. | Band % | Lane % |
|----------|------------|----------------|----------------|--------------|-------------|-------------|--------|--------|
| 1        |            | N/A            | 0.087          | 780,512      | N/A         | 0.23        | 28.8   | 20.5   |
| 2        |            | N/A            | 0.894          | 1,844,338    | N/A         | 0.67        | 66.2   | 71.7   |

Lane 6

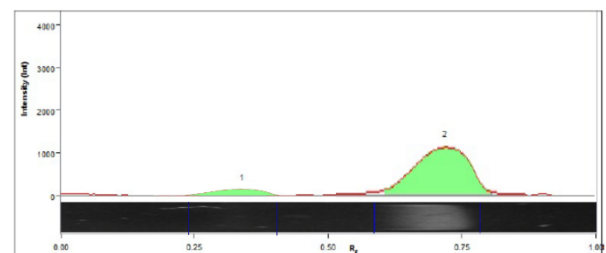

| Band No. | Band Label | Mol. Wt. (KDa) | Relative Front | Volume (Int) | Abs. Quant. | Rel. Quant. | Band % | Lane % |
|----------|------------|----------------|----------------|--------------|-------------|-------------|--------|--------|
| 1        |            | N/A            | 0.087          | 312,394      | N/A         | 0.06        | 8.6    | 8.0    |
| 2        |            | N/A            | 0.894          | 2,740,371    | N/A         | 0.67        | 91.4   | 85.1   |

**Figure 45.** Results of electrophoresis by pBR322 plasmid DNA band intensity against dose-dependent with compound **2**; Lane 1, pBR322 plasmid DNA (control); Lane 2, oxidative DNA; Lane 3, 7.5  $\mu\text{M}$ ; Lane 4, 15.0  $\mu\text{M}$ ; Lane 5, 30.0  $\mu\text{M}$ ; Lane 6, 60.0  $\mu\text{M}$ .

**Table 1.** pBR322 plasmid DNA damage protective effect of **1-18**.

|               | scDNA<br>band intensity | ocDNA<br>band intensity | DNA damage<br>(%) | DNA protective<br>effect (%) |
|---------------|-------------------------|-------------------------|-------------------|------------------------------|
| pBR322 DNA    | 2472.2                  | 77.3                    | -                 | -                            |
| oxidative DNA | 399.2                   | 1767.2                  | -                 | -                            |
| <b>1</b>      | 215.8                   | 2155.8                  | 87.2              | 12.8                         |
| <b>2</b>      | 1251.6                  | 226.1                   | 9.1               | 90.9                         |
| <b>3</b>      | 1471.0                  | 284.15                  | 11.5              | 88.5                         |
| <b>4</b>      | 198.8                   | 1998.4                  | 80.8              | 19.2                         |
| <b>5</b>      | 858.7                   | 1133.4                  | 45.8              | 54.2                         |
| <b>6</b>      | 1250.2                  | 383.1                   | 15.5              | 84.5                         |
| <b>7</b>      | 793.5                   | 1504.5                  | 60.9              | 39.1                         |
| <b>8</b>      | 1067.2                  | 1789.9                  | 72.4              | 27.6                         |
| <b>9</b>      | 1115.1                  | 1800.6                  | 72.8              | 27.2                         |
| <b>10</b>     | 1648.9                  | 384.9                   | 15.6              | 84.4                         |
| <b>11</b>     | 1619.9                  | 430.5                   | 17.4              | 82.6                         |
| <b>12</b>     | 1074.9                  | 914.2                   | 37.0              | 63.0                         |
| <b>13</b>     | 1315.9                  | 1273.9                  | 51.5              | 48.5                         |
| <b>14</b>     | 1462.6                  | 1218.6                  | 49.3              | 50.7                         |
| <b>15</b>     | 1919.8                  | 532.2                   | 21.5              | 78.5                         |
| <b>16</b>     | 2153.5                  | 505.5                   | 20.4              | 79.6                         |
| <b>17</b>     | 204.8                   | 2300.5                  | 93.1              | 6.9                          |
| <b>18</b>     | 190.8                   | 1847.5                  | 74.7              | 25.3                         |
| Trolox        | 213.2                   | 2000.5                  | 80.9              | 19.1                         |

**Table 2.** Protective effect of pBR322 plasmid DNA by dose dependent of compound 2

|               | scDNA<br>band intensity | ocDNA<br>band intensity | DNA damage<br>(%) | DNA protective<br>effect (%) |
|---------------|-------------------------|-------------------------|-------------------|------------------------------|
| pBR322 DNA    | 2854.0                  | 21.5                    | -                 | -                            |
| oxidative DNA | 104.7                   | 2488.2                  | -                 | -                            |
| 7.5 $\mu$ M   | 501.4                   | 2125.4                  | 74.5              | 25.5                         |
| 15.0 $\mu$ M  | 1033.2                  | 1494.3                  | 52.4              | 47.6                         |
| 30.0 $\mu$ M  | 1844.3                  | 780.5                   | 27.3              | 72.7                         |
| 60.0 $\mu$ M  | 2740.4                  | 312.4                   | 10.9              | 89.1                         |
